# Supplementary material for: Bioactive peptides of plant origin: distribution, functionality, and evidence of benefits in food and health
Source: Royal Society of Chemistry journal article supplement (doi:10.1039/d1fo04077d), 2022-01-01
Supplement: d1fo04077d1.pdf [file d1fo04077d1.pdf]

**Supplementary Table 1.** List of plant, functional peptides and their bioactivities.

| Plant                                                                                                                                                             | Peptides                                                                        | Bioactivity                                        | References                                                                                                                                                 |
|-------------------------------------------------------------------------------------------------------------------------------------------------------------------|---------------------------------------------------------------------------------|----------------------------------------------------|------------------------------------------------------------------------------------------------------------------------------------------------------------|
| <i>Actinidia chinensis</i>                                                                                                                                        | Thaumatococin-like protein, Actc2                                               | Antifungal, Antiviral                              | Gavrović-Jankulović <i>et al.</i> , (2002) <sup>91</sup> ; Wang & Ng, (2002) <sup>383</sup>                                                                |
| <i>Actinidia deliciosa</i>                                                                                                                                        | Kiwellin                                                                        | Pore-forming                                       | Ciardello <i>et al.</i> , (2007) <sup>48</sup>                                                                                                             |
| <i>Adzuckia angularia, Medicago sativa</i>                                                                                                                        | AB2, red bean antifungal peptide, Putative defensin 3.1                         | Antiviral, Antifungal                              | Ye & Ng, (2001) <sup>424</sup>                                                                                                                             |
| <i>Adzuckia angularia, Medicago sativa</i>                                                                                                                        | AB2, red bean antifungal peptide, Putative defensin 3.1                         | Antiviral, Antifungal                              | Ye & Ng, (2001) <sup>424</sup>                                                                                                                             |
| <i>Aegilops-splendens</i>                                                                                                                                         | WAMP-4                                                                          | Antimicrobial                                      | Slavokhotova, Naumann, <i>et al.</i> , (2014) <sup>329</sup>                                                                                               |
| <i>Aesculus hippocastanum</i>                                                                                                                                     | Defensin-like protein 1, Defensin AMP1, Ah-Amp1                                 | Antibacterial, Antifungal                          | Fant <i>et al.</i> , (1999) <sup>74</sup> ; Osborn <i>et al.</i> , (1995) <sup>267</sup>                                                                   |
| <i>Aesculus hippocastanum</i>                                                                                                                                     | Ah-AMP 1                                                                        | Antimicrobial                                      | Osborn <i>et al.</i> , (1995) <sup>267</sup>                                                                                                               |
| <i>Allium cepa</i>                                                                                                                                                | Antimicrobial protein Ace-AMP1                                                  | Antibacterial, Antifungal, Hemolytic, Cytotoxic    | Phillippe <i>et al.</i> , (1995) <sup>283</sup> ; Tassin <i>et al.</i> , (1998) <sup>350</sup>                                                             |
| <i>Allium cepa var. aggregatum</i>                                                                                                                                | Ascalin                                                                         | Antifungal, Hemolytic, Cytotoxic                   | Wang & Ng, (2002) <sup>384</sup>                                                                                                                           |
| <i>Allium sativum</i>                                                                                                                                             | Alliumin                                                                        | Antibacterial, Anticancer, Antifungal              | Xia & Ng, (2005) <sup>b413</sup>                                                                                                                           |
| <i>Allium sativum</i>                                                                                                                                             | Angiotensin I-converting enzyme inhibitor 4                                     | Enzyme-inhibitor, Antihypertensive, Taste          | Neuropeptide, ACE-inhibitor, García <i>et al.</i> , (2013) <sup>90</sup> ; Puchalska <i>et al.</i> , (2015) <sup>298</sup>                                 |
| <i>Allium sativum</i>                                                                                                                                             | Angiotensin I-converting enzyme inhibitor 5                                     | Enzyme-inhibitor, Antihypertensive, Taste          | Neuropeptide, ACE-inhibitor, García <i>et al.</i> , (2013) <sup>90</sup> ; Puchalska <i>et al.</i> , (2015) <sup>298</sup>                                 |
| <i>Allium sativum</i>                                                                                                                                             | Angiotensin I-converting enzyme inhibitor 2                                     | Enzyme-inhibitor, Antihypertensive, ACE-inhibitor  | Neuropeptide, García <i>et al.</i> , (2013) <sup>90</sup> ; Puchalska <i>et al.</i> , (2015) <sup>298</sup>                                                |
| <i>Allium sativum</i>                                                                                                                                             | dipeptides<br>Ser-Tyr, Gly-Tyr, Phe-Tyr, Asn-Tyr, Ser-Phe, Gly-Phe, and Asn-Phe | Antihypertensive, Antioxidant                      | Suetsuna, (1998) <sup>341</sup>                                                                                                                            |
| <i>Amaranthus caudatus, Amaranthus hypochondriacus</i>                                                                                                            | Antimicrobial peptide Ac-AMP2                                                   | Antibacterial, Antifungal, Alpha-amylase-inhibitor | Broekaert <i>et al.</i> , (1992) <sup>25</sup> ; Chagolla-Lopez <i>et al.</i> , (1994) <sup>35</sup> ; Van den Bergh <i>et al.</i> , (2002) <sup>371</sup> |
| <i>Amaranthus caudatus, Amaranthus hypochondriacus, Amaranthus tricolor, Amaranthus retroflexus, Amaranthus hybridus, Amaranthus blitum, Amaranthus cruentus,</i> | AC-AMP1                                                                         | Antifungal, Antibacterial                          | Broekaert <i>et al.</i> , (1992) <sup>25</sup> ; De Bolle <i>et al.</i> , (1993) <sup>63</sup>                                                             |

|                                                     |                                                                                                                                                |                                                            |                |                                                                                          |
|-----------------------------------------------------|------------------------------------------------------------------------------------------------------------------------------------------------|------------------------------------------------------------|----------------|------------------------------------------------------------------------------------------|
| <i>Amaranthus albus</i>                             |                                                                                                                                                |                                                            |                |                                                                                          |
| <i>Amaranthus hypochondriacus</i>                   | Seed glutenin fragment 75                                                                                                                      | Anti-inflammatory                                          |                | Silva-Sánchez <i>et al.</i> , (2008) <sup>325</sup>                                      |
| <i>Amaranthus hypochondriacus</i>                   | peptide matched more than 60% of the soybean lunasin peptide sequence                                                                          | Antihypertensive                                           |                | Silva-Sánchez <i>et al.</i> , (2008) <sup>325</sup>                                      |
| <i>Amaranthus hypochondriacus</i>                   | tripeptides were detected: IKP and LEP, ALEP and VIKP                                                                                          | Antihypertensive                                           |                | Vecchi & Añón, (2009) <sup>373</sup>                                                     |
| <i>Amaranthus retroflexus</i>                       | Ar-AMP                                                                                                                                         | Antimicrobial, Antifungal                                  | Antibacterial, | Lipkin <i>et al.</i> , (2005) <sup>182</sup>                                             |
| <i>Amaryllis belladonna</i>                         | Amaryllin                                                                                                                                      | Antifungal                                                 |                | Kumar <i>et al.</i> , (2009) <sup>162</sup>                                              |
| <i>Ambrosia artemisiifolia</i> var. <i>elatiior</i> | Pollen allergen Amb a 5 [L2]<br>Pollen allergen Amb a 5 [V2]                                                                                   | Allergen                                                   |                | Mole <i>et al.</i> , (1975) <sup>218</sup>                                               |
| <i>Angelica sinensis</i>                            | AsiPeps                                                                                                                                        | Antioxidant                                                |                | Wang <i>et al.</i> , (2016) <sup>388</sup>                                               |
| <i>Annona cherimola</i>                             | cherimolacyclopeptide B                                                                                                                        | Cytotoxic                                                  |                | Osipov <i>et al.</i> , (2004) <sup>269</sup>                                             |
| <i>Annona cherimola</i>                             | cherimolacyclopeptide A                                                                                                                        | Cytotoxic                                                  |                | Wélé, Landon, <i>et al.</i> , (2004) <sup>397</sup>                                      |
| <i>Annona cherimola</i>                             | Cyclopeptide E                                                                                                                                 | Antimicrobial, Anticancer                                  |                | Wélé, Zhang, <i>et al.</i> , (2005) <sup>399</sup>                                       |
| <i>Annona cherimola</i>                             | Cyclopeptide F                                                                                                                                 | Antimicrobial, Anticancer                                  |                | Wélé, Zhang, <i>et al.</i> , (2005) <sup>399</sup>                                       |
| <i>Annona cherimola</i>                             | Cherimolacyclopeptide G                                                                                                                        | NA                                                         |                | Wele <i>et al.</i> , (2006) <sup>400</sup>                                               |
| <i>Annona cherimola</i>                             | Cherimolacyclopeptide D                                                                                                                        | NA                                                         |                | Wélé, Ndoye, <i>et al.</i> , (2005) <sup>398</sup>                                       |
| <i>Annona cherimola</i>                             | Cherimolacyclopeptide C                                                                                                                        | Cytotoxic                                                  |                | Wélé, Zhang, <i>et al.</i> , (2004) <sup>401</sup>                                       |
| <i>Annona glabra</i>                                | glabrin B                                                                                                                                      | Anticancer                                                 |                | Li <i>et al.</i> , (1998) <sup>174</sup>                                                 |
| <i>Annona glabra</i>                                | Glabrin A                                                                                                                                      | Anticancer                                                 |                | Li <i>et al.</i> , (1998) <sup>174</sup>                                                 |
| <i>Annona glabra</i>                                | glabrin C                                                                                                                                      | Anticancer                                                 |                | Li <i>et al.</i> , (1998) <sup>174</sup>                                                 |
| <i>Annona glabra</i>                                | Glabrin D                                                                                                                                      | Anticancer                                                 |                | Li <i>et al.</i> , (1998) <sup>174</sup>                                                 |
| <i>Annona montana</i>                               | Cyclomontanin C, Cyclomontanin A/<br>Cyclomontanin B, Cyclomontanin D                                                                          | Anti-inflammatory                                          |                | Chuang <i>et al.</i> , (2008) <sup>47</sup>                                              |
| <i>Annona squamosa</i>                              | Annosquamosin A                                                                                                                                | Anticancer, Antiparasitic                                  |                | Chao-Ming <i>et al.</i> , (1997) <sup>39</sup>                                           |
| <i>Annona squamosa</i>                              | Cyclosquamosin A,<br>Cyclosquamosin B,<br>Cyclosquamosin C,<br>Cyclosquamosin D,<br>Cyclosquamosin E,<br>Cyclosquamosin F,<br>Cyclosquamosin G | Antimalarial, Immunosuppressive,<br>Antifeedant, Cytotoxic |                | Morita <i>et al.</i> , (1999) <sup>230</sup>                                             |
| <i>Annona squamosa</i>                              | Cyclosquamosin I                                                                                                                               | Anti-inflammatory                                          |                | Yang <i>et al.</i> , (2008) <sup>422</sup>                                               |
| <i>Aquilegia olympica</i>                           | Putative defensin 1                                                                                                                            | Antimicrobial                                              |                | Whittall <i>et al.</i> , (2006) <sup>402</sup>                                           |
| <i>Arabidopsis thaliana</i>                         | Defensin AtPDF2.3                                                                                                                              | Antifungal, Antimicrobial                                  |                | Epple <i>et al.</i> , (1997) <sup>70</sup> ; Lin <i>et al.</i> , (1999) <sup>180</sup> ; |
| <i>Arabidopsis lyrata</i>                           |                                                                                                                                                |                                                            |                | Vanoosthuysse <i>et al.</i> , (2001) <sup>372</sup> ; Vriens <i>et al.</i> ,             |

|                                                                                                          |                                                                                               |                                                                              |                                                                                                 |
|----------------------------------------------------------------------------------------------------------|-----------------------------------------------------------------------------------------------|------------------------------------------------------------------------------|-------------------------------------------------------------------------------------------------|
| <i>Arachis diogoi</i>                                                                                    | Thaumatococcal protein                                                                        | Antifungal                                                                   | (2016) <sup>378</sup> ; Yamada <i>et al.</i> , (2003) <sup>416</sup>                            |
| <i>Arachis diogoi</i> , <i>Cicer arietinum</i> , <i>Cajanus cajan</i> , <i>Trigonella foenum-graccum</i> | Coccinin                                                                                      | Antifungal, Antiproliferative, HIV-1-reverse-transcriptase-inhibition        | Singh <i>et al.</i> , (2013) <sup>327</sup><br>Ngai & Ng, (2004) <sup>c249</sup>                |
| <i>Arachis hypogaea</i>                                                                                  | Flour angiotensin I-converting enzyme inhibitor                                               | Enzyme-inhibitor, Neuropeptide, ACE-inhibitor                                | Guang & Phillips, (2009) <sup>102</sup>                                                         |
| <i>Arachis hypogaea</i>                                                                                  | ACE inhibitory peptide                                                                        | ACE-inhibitor, Antihypertensive                                              | Jimsheena & Gowda, (2010) <sup>141</sup>                                                        |
| <i>Arenaria oreophila</i>                                                                                | Arenariphilin A                                                                               | Antihypertensive                                                             | Cavazos & Gonzalez de Mejia, (2013) <sup>34</sup>                                               |
| <i>Asparagus officinalis</i> , <i>Daucus carota</i>                                                      | Phytosulfokine beta                                                                           | Development-regulator                                                        | Matsubayashi & Sakagami, (1996) <sup>202</sup>                                                  |
| <i>Astragalus mongholicus</i>                                                                            | Antifungal lectin AMML                                                                        | Antifungal                                                                   | Yan <i>et al.</i> , (2005) <sup>417</sup>                                                       |
| <i>Avena sativa</i>                                                                                      | Thionin Asthi4, Thionin Asthi5, Leaf thionin Asthi2, Leaf thionin Asthi1, Leaf thionin Asthi3 | Antimicrobial                                                                | Iwai <i>et al.</i> , (2002) <sup>136</sup>                                                      |
| <i>Avena sativa</i>                                                                                      | Endochitinase                                                                                 | Antifungal                                                                   | Sørensen <i>et al.</i> , (2010) <sup>335</sup>                                                  |
| <i>Bambusa vulgaris</i>                                                                                  | Asp-Tyr was identified as the key active component                                            | ACE-inhibitor                                                                | Liu <i>et al.</i> , (2013) <sup>186</sup>                                                       |
| <i>Basella alba</i>                                                                                      | Alpha-basrubrin, Beta-basrubin                                                                | Antifungal, Antiviral                                                        | Wang & Ng, (2001) <sup>382</sup>                                                                |
| <i>Benincasa hispida</i>                                                                                 | Hispidalin                                                                                    | Antibacterial, Antifungal, Antioxidant                                       | Sharma <i>et al.</i> , (2014) <sup>320</sup>                                                    |
| <i>Benincasa hispida</i>                                                                                 | transPro24 Serine proteinase inhibitor                                                        | Enzyme-inhibitor                                                             | Atiwetin <i>et al.</i> , (2006) <sup>8</sup>                                                    |
| <i>Benincasa hispida</i>                                                                                 | Alpha-benincasin                                                                              | Antifungal                                                                   | Ng <i>et al.</i> , (2003) <sup>246</sup> ; Zhu <i>et al.</i> , (2018) <sup>441</sup>            |
| <i>Beta vulgaris</i>                                                                                     | AX2, AX1                                                                                      | Antibacterial, Antifungal                                                    | Kragh <i>et al.</i> , (1995) <sup>159</sup>                                                     |
| <i>Beta vulgaris</i>                                                                                     | IWF4                                                                                          | Antifungal                                                                   | Nielsen <i>et al.</i> , (1997) <sup>256</sup>                                                   |
| <i>Beta vulgaris</i>                                                                                     | IWF2 (Bv-LTP2), IWF1 (Bv-LTP1)                                                                | Antifungal                                                                   | Nielsen <i>et al.</i> , (1996) <sup>255</sup>                                                   |
| <i>Brassica napus</i>                                                                                    | Cysteine-rich antifungal protein 1 (Bn-AFP1)                                                  | Antifungal                                                                   | Terras <i>et al.</i> , (1993) <sup>353</sup>                                                    |
| <i>Brassica napus</i>                                                                                    | Pro-rich peptide BnPRP1                                                                       | Antibacterial, Antifungal                                                    | Cao <i>et al.</i> , (2015) <sup>30</sup>                                                        |
| <i>Brassica napus</i>                                                                                    | Metallothionein-like peptide LSC54                                                            | Heavy-metal-binding                                                          | Buchanan-Wollaston, (1994) <sup>28</sup>                                                        |
| <i>Brassica napus</i>                                                                                    | ACE inhibitory peptide                                                                        | ACE-inhibitor                                                                | Lee & Hur, (2017) <sup>a170</sup>                                                               |
| <i>Brassica napus</i> , <i>Raphanus sativus</i>                                                          | Cysteine-rich antifungal protein 2 (Bn-AFP2), Rs-AFP-1                                        | Antifungal, Antibacterial                                                    | Kraszewska <i>et al.</i> , (2016) <sup>160</sup> ; Terras <i>et al.</i> , (1993) <sup>353</sup> |
| <i>Brassica oleracea</i>                                                                                 | Broccoli protein fragment                                                                     | Enzyme-inhibitor, Neuropeptide, ACE-inhibitor, Hypotensive, Antihypertensive | García <i>et al.</i> , (2013) <sup>90</sup> ; Lee <i>et al.</i> , (2006) <sup>168</sup>         |
| <i>Brassica oleracea</i> var.                                                                            | Napin-like polypeptide                                                                        | Antibacterial                                                                | Ngai & Ng, (2004) <sup>b248</sup>                                                               |

|                                               |               |                                                                                            |                                                                                    |                                                                                                                                        |
|-----------------------------------------------|---------------|--------------------------------------------------------------------------------------------|------------------------------------------------------------------------------------|----------------------------------------------------------------------------------------------------------------------------------------|
| <i>alboglabra</i>                             |               |                                                                                            |                                                                                    |                                                                                                                                        |
| <i>Brassica rapa</i>                          |               | Cysteine-rich antifungal protein 1 (Br-AFP1), Cysteine-rich antifungal protein 2 (Br-AFP2) | Antifungal                                                                         | Terras <i>et al.</i> , (1993) <sup>353</sup>                                                                                           |
| <i>Brassica rapa</i>                          |               | BrD1                                                                                       | Insecticidal                                                                       | Choi <i>et al.</i> , (2009) <sup>45</sup>                                                                                              |
| <i>Brassica rapa</i>                          | <i>subsp.</i> | Antibacterial napin                                                                        | Antibacterial                                                                      | Ngai & Ng, (2004) <sup>a247</sup>                                                                                                      |
| <i>Chinensis</i>                              |               |                                                                                            |                                                                                    |                                                                                                                                        |
| <i>Broussonetia papyrifera</i>                |               | PMAPII, PMAPI                                                                              | Antifungal                                                                         | Zhao <i>et al.</i> , (2011) <sup>438</sup>                                                                                             |
| <i>Bryonia dioica</i>                         |               | Trypsin inhibitor BDTI-II                                                                  | Enzyme-inhibitor                                                                   | Otlewska <i>et al.</i> , (1987) <sup>271</sup>                                                                                         |
| <i>Calotropis procera</i>                     |               | Osmotin (Fragment)                                                                         | Antifungal                                                                         | Freitas <i>et al.</i> , (2011) <sup>80</sup>                                                                                           |
| <i>Canavalia ensiformis</i>                   |               | Jaburetox                                                                                  | Insecticidal, Antifungal                                                           | Postal <i>et al.</i> , (2012) <sup>292</sup>                                                                                           |
| <i>Cannabis sativa</i>                        |               | ACE inhibitory peptide                                                                     | ACE-inhibitor                                                                      | Girgih, He, & Aluko, (2014) <sup>95</sup>                                                                                              |
| <i>Cannabis sativa</i>                        |               | hemp seed protein hydrolysate (HPH)                                                        | Antioxidant, Antihypertensive                                                      | Girgih, He, Malomo, <i>et al.</i> , (2014) <sup>96</sup>                                                                               |
| <i>Cannabis sativa</i>                        |               | ACE inhibitory peptide (HPH)                                                               | Antioxidant, Antihypertensive, ACE-inhibitor                                       | Girgih, He, & Aluko, (2014) <sup>95</sup> ; Girgih, He, Malomo, <i>et al.</i> , (2014) <sup>96</sup>                                   |
| <i>Capsella bursa pastoris</i>                |               | Shepherin II, Antimicrobial peptide shep-GRP                                               | Antibacterial, Antifungal                                                          | Park <i>et al.</i> , (2000) <sup>272</sup>                                                                                             |
| <i>Capsella bursa pastoris</i>                |               | Shepherin I, Antimicrobial peptide shep-GRP                                                | Antibacterial, Antifungal, Hemolytic                                               | Park <i>et al.</i> , (2000) <sup>272</sup> ; Remuzgo <i>et al.</i> , (2014) <sup>302</sup>                                             |
| <i>Capsicum annuum</i>                        |               | Osmotin-like protein                                                                       | Antimicrobial                                                                      | Kim <i>et al.</i> , (2002) <sup>149</sup>                                                                                              |
| <i>Capsicum annuum</i>                        |               | Defensin J1-1                                                                              | Antimicrobial, Antifungal                                                          | Meyer <i>et al.</i> , (1996) <sup>212</sup>                                                                                            |
| <i>Capsicum annuum</i>                        |               | Defensin J1-2                                                                              |                                                                                    |                                                                                                                                        |
| <i>Capsicum annuum</i>                        |               | Proteinase inhibitor PSI-1.2, HyPep                                                        | Antifungal, Serine-protease-inhibitor                                              | Vieira Bard <i>et al.</i> , (2015) <sup>375</sup>                                                                                      |
| <i>Capsicum baccatum</i>                      |               | BCH4a                                                                                      | Antifungal, Alpha-amylase-inhibitor                                                | Bard <i>et al.</i> , (2014) <sup>16</sup>                                                                                              |
| <i>Capsicum chinense</i>                      |               | CcD1                                                                                       | Antifungal                                                                         | Anaya-López <i>et al.</i> , (2006) <sup>4</sup>                                                                                        |
| <i>Castanopsis chinensis</i>                  |               | Thaumatococin-like protein                                                                 | Antifungal, Antiviral                                                              | Chu & Ng, (2003) <sup>46</sup>                                                                                                         |
| <i>Chassalia chartacea</i>                    |               | Cyclotide chassatides                                                                      | Antimicrobial, Cytotoxic, Hemolytic                                                | Nguyen <i>et al.</i> , (2012) <sup>251</sup>                                                                                           |
| <i>Chassalia curviflora</i> , <i>tricolor</i> | <i>Viola</i>  | Chacur 1                                                                                   | Antimicrobial                                                                      | Hellinger, Koehbach, Soltis, <i>et al.</i> , (2015) <sup>125</sup> ; Koehbach <i>et al.</i> , (2013) <sup>151</sup>                    |
| <i>Chassalia parvifolia</i>                   |               | Circulin-C                                                                                 | Antiviral, Anti-HIV                                                                | Gustafson <i>et al.</i> , (2000) <sup>103</sup>                                                                                        |
|                                               |               | Circulin D                                                                                 |                                                                                    |                                                                                                                                        |
|                                               |               | Circulin-E                                                                                 |                                                                                    |                                                                                                                                        |
|                                               |               | Circulin F                                                                                 |                                                                                    |                                                                                                                                        |
| <i>Chassalia parvifolia</i>                   |               | Circulin-B, CIRB                                                                           | Antibacterial, Antifungal, Hemolytic, Cytotoxic, Antiviral, Insecticidal, Anti-HIV | Derua <i>et al.</i> , (1996) <sup>65</sup> ; Hayashi <i>et al.</i> , (1966) <sup>116</sup> ; Tam <i>et al.</i> , (1999) <sup>347</sup> |

|                                                      |                                                                                             |                                                                                |                                                                                                                                                                                                                                       |
|------------------------------------------------------|---------------------------------------------------------------------------------------------|--------------------------------------------------------------------------------|---------------------------------------------------------------------------------------------------------------------------------------------------------------------------------------------------------------------------------------|
| <i>Chassalia parvifolia</i>                          | Circulin-A, CIRA                                                                            | Antibacterial, Antifungal, Hemolytic, Cytotoxic, Anti-HIV                      | Daly <i>et al.</i> , (1999) <sup>58</sup> ; Derua <i>et al.</i> , (1996) <sup>65</sup> ; Fujikawa <i>et al.</i> , (1965) <sup>81</sup> ; Kraszewska <i>et al.</i> , (2016) <sup>160</sup> ; Tam <i>et al.</i> , (1999) <sup>347</sup> |
| <i>Chlorella vulgaris</i>                            | Angiotensin I-converting enzyme inhibitor                                                   | Antihypertensive                                                               | He <i>et al.</i> , (2013) <sup>119</sup>                                                                                                                                                                                              |
| <i>Citrullus vulgaris</i> , <i>Citrullus lanatus</i> | Trypsin inhibitor CVTI-I                                                                    | Enzyme-inhibitor                                                               | Otlewska <i>et al.</i> , (1987) <sup>271</sup>                                                                                                                                                                                        |
| <i>Citrus aurantium</i>                              | CA26-C1-002-103-F06-CT.F<br>CA26-C1-002-078-G08-CT.F                                        | Estrogen-like-activity                                                         | Condie <i>et al.</i> , (2011) <sup>52</sup>                                                                                                                                                                                           |
| <i>Citrus medica</i>                                 | Noname-671<br>Noname-672                                                                    | Antibiotic, Anti-inflammatory, Cytotoxic                                       | Matsumoto <i>et al.</i> , (2002) <sup>204</sup>                                                                                                                                                                                       |
| <i>Citrus natsudaoidai</i>                           | a_2_H09/ Cyclonatsudamine A                                                                 | Estrogen-like-activity, Neuropeptide                                           | Condie <i>et al.</i> , (2011) <sup>52</sup> ; Luo <i>et al.</i> , (2007) <sup>190</sup>                                                                                                                                               |
| <i>Citrus natsudaoidai</i> , <i>Citrus sinensis</i>  | citrusin II<br>citrusin III<br>citrusin IV                                                  | Anticancer                                                                     | Matsubara <i>et al.</i> , (1991) <sup>201</sup>                                                                                                                                                                                       |
| <i>Citrus unshiu</i>                                 | citrusin I                                                                                  | Anticancer                                                                     | Matsubara <i>et al.</i> , (1991) <sup>201</sup>                                                                                                                                                                                       |
| <i>Clitoria ternatea</i>                             | Cyclotide cliotide T8<br>Cyclotide cliotide T9<br>Cyclotide cliotide T2<br>Cyclotide cter B | Antimicrobial                                                                  | Nguyen, Zhang, Nguyen, <i>et al.</i> , (2011) <sup>252</sup>                                                                                                                                                                          |
| <i>Clitoria ternatea</i>                             | Ct-AMP1                                                                                     | Antifungal, Antimicrobial                                                      | Osborn <i>et al.</i> , (1995) <sup>267</sup>                                                                                                                                                                                          |
| <i>Clitoria ternatea</i>                             | Cter L<br>Cter K                                                                            | Antimicrobial, Insecticidal, Hemolytic, Anthelmintic, Antibacterial, Cytotoxic | Poth <i>et al.</i> , (2011) <sup>293</sup>                                                                                                                                                                                            |
| <i>Clitoria ternatea</i>                             | cT22                                                                                        | Antibacterial                                                                  | Nguyen <i>et al.</i> , (2016) <sup>254</sup>                                                                                                                                                                                          |
| <i>Clitoria ternatea</i>                             | cT45                                                                                        | Antimicrobial                                                                  | Serra <i>et al.</i> , (2016) <sup>317</sup>                                                                                                                                                                                           |
| <i>Clitoria ternatea</i>                             | cliotide T8                                                                                 | Antimicrobial, Cytotoxic                                                       | Nguyen, Zhang, Nguyen, <i>et al.</i> , (2011) <sup>252</sup>                                                                                                                                                                          |
| <i>Cocos nucifera</i>                                | Antimicrobial peptide 1                                                                     | Antibacterial                                                                  | Mandal <i>et al.</i> , (2009) <sup>193</sup>                                                                                                                                                                                          |
| <i>Cocos nucifera</i>                                | Antifungal protein from coconut                                                             | Antifungal, Antiviral, Anti-HIV                                                | Wang & Ng, (2005) <sup>387</sup>                                                                                                                                                                                                      |
| <i>Cocos nucifera</i>                                | Cn-AMP3                                                                                     | Antimicrobial                                                                  | Mandal <i>et al.</i> , (2009) <sup>193</sup>                                                                                                                                                                                          |
| <i>Cocos nucifera</i>                                | Cn-AMP1                                                                                     | Antimicrobial, Antifungal                                                      | Mandal <i>et al.</i> , (2009) <sup>193</sup>                                                                                                                                                                                          |
| <i>Cocos nucifera</i>                                | Cn-AMP2                                                                                     | Antibacterial, Antifungal, Antimicrobial                                       | Mandal <i>et al.</i> , (2009) <sup>193</sup>                                                                                                                                                                                          |
| <i>Coffea arabica</i>                                | 50S ribosomal peptide L36                                                                   | Ribonucleoprotein                                                              | Samson <i>et al.</i> , (2012) <sup>310</sup>                                                                                                                                                                                          |
| <i>Coffea canephora</i>                              | Cc-GRP                                                                                      | Antifungal                                                                     | Zottich <i>et al.</i> , (2013) <sup>443</sup>                                                                                                                                                                                         |
| <i>Coffea canephora</i>                              | Cc-LTP1                                                                                     | Alpha-amylase-inhibitor, Antifungal                                            | Zottich <i>et al.</i> , (2011) <sup>444</sup>                                                                                                                                                                                         |
| <i>Coix lachryma</i>                                 | most potent peptide GAAGGAF                                                                 | ACE-inhibitor                                                                  | B. Li <i>et al.</i> , (2017) <sup>172</sup>                                                                                                                                                                                           |
| <i>Coix lachryma</i>                                 | oligopeptides                                                                               | ACE-inhibitor, Antihypertensive                                                | Qiao <i>et al.</i> , (2016) <sup>299</sup>                                                                                                                                                                                            |

|                                                         |                                                                                                                                               |                                      |                                                                                                                                                                                                                                                                                          |
|---------------------------------------------------------|-----------------------------------------------------------------------------------------------------------------------------------------------|--------------------------------------|------------------------------------------------------------------------------------------------------------------------------------------------------------------------------------------------------------------------------------------------------------------------------------------|
| <i>Corylus heterophylla</i>                             | novel ACE inhibitory peptides Ala-Val-Lys-Val-Leu (AVKVL), Tyr-Leu-Val-Arg (YLVR), and Thr-Leu-Val-Gly-Arg (TLVGR)                            | ACE-inhibitor                        | Liu <i>et al.</i> , (2018) <sup>183</sup>                                                                                                                                                                                                                                                |
| <i>Cryptomeria japonica</i>                             | Putative Rapid alkalization factor, RALF                                                                                                      | RALF-Rapid-alkalinization-factor     | Pearce <i>et al.</i> , (2001) <sup>277</sup>                                                                                                                                                                                                                                             |
| <i>Cucumis melo</i>                                     | Trypsin inhibitor CMeTI-A'<br>Trypsin inhibitor CMeTI-B'                                                                                      | Enzyme-inhibitor                     | Lee & Lin, (1995) <sup>167</sup>                                                                                                                                                                                                                                                         |
| <i>Cucumis melo</i>                                     | Trypsin inhibitor CMeTI-B<br>Trypsin inhibitor CMCTI-I<br>Trypsin inhibitor CMCTI-II<br>Trypsin inhibitor CMCTI-III<br>Trypsin inhibitor HMTI | Enzyme-inhibitor                     | Takeshi, (1977) <sup>346</sup>                                                                                                                                                                                                                                                           |
| <i>Cucurbita maxima</i>                                 | Antifungal protein Pr-2                                                                                                                       | Antifungal                           | Park <i>et al.</i> , (2009) <sup>273</sup>                                                                                                                                                                                                                                               |
| <i>Cucurbita maxima</i>                                 | Cucurmoschin                                                                                                                                  | Antimicrobial, Antifungal            | Wang & Ng, (2003) <sup>b386</sup>                                                                                                                                                                                                                                                        |
| <i>Cucurbita maxima</i>                                 | Trypsin inhibitor CMTI-IV                                                                                                                     | Enzyme-inhibitor                     | Wieczorek <i>et al.</i> , (1985) <sup>403</sup>                                                                                                                                                                                                                                          |
| <i>Cucurbita maxima</i>                                 | Basic peptide                                                                                                                                 | Toxin                                | Naisbitt <i>et al.</i> , (1988) <sup>240</sup>                                                                                                                                                                                                                                           |
| <i>Cucurbita maxima</i>                                 | Trypsin inhibitor CMTI-I                                                                                                                      | Enzyme-inhibitor                     | Wilusz <i>et al.</i> , (1983) <sup>404</sup>                                                                                                                                                                                                                                             |
| <i>Cucurbita maxima</i>                                 | Trypsin inhibitor CMTI-III                                                                                                                    | Enzyme-inhibitor                     | Wieczorek <i>et al.</i> , (1985) <sup>403</sup>                                                                                                                                                                                                                                          |
| <i>Cucurbita pepo</i>                                   | Trypsin inhibitor CPTI II<br>Trypsin inhibitor CPTI-III                                                                                       | Enzyme-inhibitor                     | Wieczorek <i>et al.</i> , (1985) <sup>403</sup>                                                                                                                                                                                                                                          |
| <i>Cullen corylifolia</i>                               | Antifungal protein, Psc-AFP                                                                                                                   | Antifungal                           | Yang <i>et al.</i> , (2006) <sup>420</sup>                                                                                                                                                                                                                                               |
| <i>Cuminum cyminum</i>                                  | Alpha-amylase inhibitor                                                                                                                       | Alpha-amylase-inhibitor, Antioxidant | Siow & Gan, (2016) <sup>328</sup>                                                                                                                                                                                                                                                        |
| <i>Cuscuta exaltata</i>                                 | Plastid 50S ribosomal peptide L36                                                                                                             | Ribonucleoprotein                    | McNeal <i>et al.</i> , (2007) <sup>209</sup>                                                                                                                                                                                                                                             |
| <i>Cuscuta gronovii</i> ,<br><i>Cuscuta obtusiflora</i> | Plastid 50S ribosomal peptide L36                                                                                                             | Ribonucleoprotein                    | Funk <i>et al.</i> , (2007) <sup>85</sup>                                                                                                                                                                                                                                                |
| <i>Cycas revoluta</i>                                   | Anticancerous peptide 1                                                                                                                       | Antibacterial, Anticancer            | Mandal <i>et al.</i> , (2012) <sup>194</sup>                                                                                                                                                                                                                                             |
| <i>Cycas revoluta</i>                                   | Cy-AMP3                                                                                                                                       | Antibacterial, Antifungal            | Yokoyama <i>et al.</i> , (2008) <sup>430</sup>                                                                                                                                                                                                                                           |
| <i>Cycas revoluta</i>                                   | Cy-AMP1                                                                                                                                       | Antibacterial, Antifungal            | Yokoyama <i>et al.</i> , (2008) <sup>430</sup> ; (2009) <sup>429</sup>                                                                                                                                                                                                                   |
| <i>Cycas revoluta</i>                                   | Cy-AMP2                                                                                                                                       | Antibacterial, Antifungal            | Yokoyama <i>et al.</i> , (2008) <sup>430</sup>                                                                                                                                                                                                                                           |
| <i>Cycas taitungensis</i> ,<br><i>Cycas taiwaniana</i>  | 50S ribosomal peptide L36                                                                                                                     | Ribonucleoprotein                    | Wu <i>et al.</i> , (2007) <sup>410</sup>                                                                                                                                                                                                                                                 |
| <i>Dahlia merckii</i>                                   | Defensin AMP2 / DmAMP2                                                                                                                        | Antibacterial, Antifungal            | Osborn <i>et al.</i> , (1995) <sup>267</sup> ; Thevissen, Cammue, <i>et al.</i> , (2000) <sup>354</sup> ; Thevissen, Osborn, <i>et al.</i> , (2000) <sup>357</sup> ; Thevissen <i>et al.</i> , (2003) <sup>356</sup> ; (2004) <sup>358</sup> ; Zhu <i>et al.</i> , (2007) <sup>442</sup> |
| <i>Dahlia merckii</i>                                   | Defensin Dm-AMP2                                                                                                                              | Antimicrobial, Antifungal            | Osborn <i>et al.</i> , (1995) <sup>267</sup>                                                                                                                                                                                                                                             |

|                                                          |                                                       |                                                   |                                                                                                                   |
|----------------------------------------------------------|-------------------------------------------------------|---------------------------------------------------|-------------------------------------------------------------------------------------------------------------------|
| <i>Dahlia merckii</i>                                    | Dm-AMP1                                               | Antimicrobial                                     | Osborn <i>et al.</i> , (1995) <sup>267</sup>                                                                      |
| <i>Datura stramonium</i>                                 | Datucin                                               | Antifungal, Antibiofilm                           | Mandal, (2012) <sup>192</sup>                                                                                     |
| <i>Dendrobium findlayanum</i>                            | Mannose-specific lectin                               | Antifungal                                        | Sudmoon <i>et al.</i> , (2008) <sup>340</sup>                                                                     |
| <i>Dendrocalamus latiflora</i><br>Munro                  | Dendrocin                                             | Antifungal, Antimicrobial                         | Wang & Ng, (2003) <sup>a385</sup>                                                                                 |
| <i>Dendrophthora clavata</i> ,<br><i>Hordeum vulgare</i> | Denclatoxin-B                                         | Antimicrobial, Toxin                              | (Samuelsson <i>et al.</i> , 1977)                                                                                 |
| <i>Dianthus caryophyllus</i>                             | IAA16-like,<br>Dc004                                  | Estrogen-like-activity                            | Condie <i>et al.</i> , (2011) <sup>52</sup>                                                                       |
| <i>Dianthus superbus</i>                                 | dianthin F, dianthin C, dianthin E, dianthin D        | Cytotoxic                                         | Hsieh <i>et al.</i> , (2004) <sup>128</sup>                                                                       |
| <i>Dianthus superbus</i>                                 | dianthin B                                            | Diuretic, Anti-inflammatory                       | Wang <i>et al.</i> , (1998) <sup>394</sup>                                                                        |
| <i>Dianthus superbus</i>                                 | dianthin A                                            | Diuretic, Anti-inflammatory                       | Wang <i>et al.</i> , (1998) <sup>394</sup>                                                                        |
| <i>Dianthus superbus</i>                                 | Longicalycinin A                                      | Antibacterial, Anticancer, Antifungal, Nematocide | Dahiya, (2007) <sup>57</sup>                                                                                      |
| <i>Diospyros texana</i>                                  | Antifungal protein                                    | Antifungal                                        | (Vu <i>et al.</i> , 1977)                                                                                         |
| <i>Dorstenia contrajerva</i>                             | Anti-HIV peptide, Contrajervin                        | Antiviral                                         | Bokesch <i>et al.</i> , (2004) <sup>23</sup>                                                                      |
| <i>Ecballium elaterium</i>                               | Trypsin inhibitor EETI-II                             | Enzyme-inhibitor                                  | FAVEL <i>et al.</i> , (1989) <sup>75</sup>                                                                        |
| <i>Echinochloa crus-galli</i>                            | EcLTP                                                 | Antibacterial, Antifungal, Anti-protist           | Rogozhin <i>et al.</i> , (2012) <sup>306</sup>                                                                    |
| <i>Echinochloa crus-galli</i>                            | Defensin Ec-AMP-D1, Defensin Ec-AMP-D2                | Antimicrobial, Antifungal                         | Odintsova <i>et al.</i> , (2008) <sup>262</sup>                                                                   |
| <i>Echinochloa crus-galli</i>                            | Antimicrobial peptide EcAMP2.1                        | Antifungal, Anti-protist                          | Rogozhin <i>et al.</i> , (2012) <sup>306</sup> ; Ryazantsev <i>et al.</i> , (2014) <sup>308</sup>                 |
| <i>Echinochloa crus-galli</i>                            | Antimicrobial peptide EcAMP3                          | Antibacterial, Antifungal                         | Ryazantsev <i>et al.</i> , (2014) <sup>308</sup>                                                                  |
| <i>Echinochloa crus-galli</i>                            | EcAMP2                                                | Antifungal, Antimicrobial, Anti-protist           | Rogozhin <i>et al.</i> , (2012) <sup>306</sup> ; Ryazantsev <i>et al.</i> , (2014) <sup>308</sup>                 |
| <i>Echinochloa crus-galli</i>                            | EcAMP1                                                | Antifungal, Antimicrobial, Anti-protist           | Nolde <i>et al.</i> , (2011) <sup>260</sup> ; Ryazantsev <i>et al.</i> , (2014) <sup>308</sup>                    |
| <i>Echinocystis lobata</i>                               | Trypsin inhibitor ELTI-I<br>Trypsin inhibitor ELTI-II | Enzyme-inhibitor                                  | Stachowiak <i>et al.</i> , (1996) <sup>337</sup>                                                                  |
| <i>Echinopsis pachanoi</i>                               | Ep-AMP1                                               | Antibacterial, Anticancer, Antifungal             | Aboye <i>et al.</i> , (2015) <sup>1</sup>                                                                         |
| <i>Elaeis guineensis</i>                                 | EGAD1, Defensin EGAD                                  | Antimicrobial                                     | Tregearm <i>et al.</i> , (2002) <sup>363</sup>                                                                    |
| <i>Engelmannia peristenia</i>                            | 30 kDa antifungal protein                             | Antifungal                                        | Huynh <i>et al.</i> , (1996) <sup>132</sup>                                                                       |
| <i>Eucommia ulmoides</i>                                 | Antifungal peptide 2, EAFP2                           | Antifungal                                        | Huang <i>et al.</i> , (2002) <sup>130</sup>                                                                       |
| <i>Eucommia ulmoides</i>                                 | Antifungal peptide 1, EAFP1<br>EAFP2                  | Antifungal                                        | Huang <i>et al.</i> , (2002) <sup>130</sup> ; (2004) <sup>131</sup> ; Xiang <i>et al.</i> , (2009) <sup>414</sup> |

|                                                                                                                                                        |                                                                                                                            |                                                   |                                                                                                                                                                                                                                                                      |
|--------------------------------------------------------------------------------------------------------------------------------------------------------|----------------------------------------------------------------------------------------------------------------------------|---------------------------------------------------|----------------------------------------------------------------------------------------------------------------------------------------------------------------------------------------------------------------------------------------------------------------------|
| <i>Euonymus europaeus</i>                                                                                                                              | Hevein-like antimicrobial peptide, Hevein-like peptide Ee-chib/1, Hevein-like peptide Ee-CBPb, Hevein-like peptide Ee-CBPI | Antimicrobial, Antifungal                         | Van Den Bergh <i>et al.</i> , (2004) <sup>370</sup>                                                                                                                                                                                                                  |
| <i>Euonymus europaeus</i>                                                                                                                              | Ee-CBP (leaves)                                                                                                            | Antifungal                                        | Van Den Bergh <i>et al.</i> , (2004) <sup>370</sup>                                                                                                                                                                                                                  |
| <i>Euonymus europaeus</i>                                                                                                                              | Ee-CBP (Bark)                                                                                                              | Antibacterial, Antifungal                         | Kraszewska <i>et al.</i> , (2016) <sup>160</sup> ; Van den Bergh <i>et al.</i> , (2002) <sup>371</sup> ; Van Den Bergh <i>et al.</i> , (2004) <sup>370</sup>                                                                                                         |
| <i>Fagopyrum esculentum</i>                                                                                                                            | Fa-AMP2<br>Fa-AMP1                                                                                                         | Antibacterial, Antifungal                         | Fujimura <i>et al.</i> , (2003) <sup>84</sup> ; (2005) <sup>83</sup>                                                                                                                                                                                                 |
| <i>Fagopyrum esculentum</i>                                                                                                                            | Bioactive peptide                                                                                                          | Immunoregulator                                   | Liu <i>et al.</i> , (1998) <sup>185</sup>                                                                                                                                                                                                                            |
| <i>Fagopyrum esculentum</i>                                                                                                                            | ACE inhibitor from <i>Fagopyrum esculentum</i>                                                                             | ACE-inhibitor                                     | Koyama <i>et al.</i> , (2013) <sup>158</sup>                                                                                                                                                                                                                         |
| <i>Fagopyrum esculentum</i>                                                                                                                            | ACE inhibitor from wheat gliadin                                                                                           | Antihypertensive, ACE-inhibitor                   | García <i>et al.</i> , (2013) <sup>90</sup> ; Lee & Hur, (2017) <sup>b171</sup> ; Li <i>et al.</i> , (2002) <sup>173</sup> ; Ma <i>et al.</i> , (2006) <sup>191</sup> ; Murray & FitzGerald, (2007) <sup>236</sup> ; Puchalska <i>et al.</i> , (2015) <sup>298</sup> |
| <i>Fagopyrum esculentum</i>                                                                                                                            | Angiotensin I-converting enzyme inhibitor 9                                                                                | ACE-inhibitor, Antihypertensive, Enzyme-inhibitor | Lee & Hur, (2017) <sup>b171</sup> ; Li <i>et al.</i> , (2002) <sup>173</sup> ; Puchalska <i>et al.</i> , (2015) <sup>298</sup>                                                                                                                                       |
| <i>Fagopyrum tataricum</i>                                                                                                                             | Angiotensin I-converting enzyme inhibitor 6                                                                                | Enzyme-inhibitor, Antihypertensive                | Li <i>et al.</i> , (2002) <sup>173</sup> ; Puchalska <i>et al.</i> , (2015) <sup>298</sup>                                                                                                                                                                           |
| <i>Fagopyrum tataricum</i>                                                                                                                             | Angiotensin I-converting enzyme inhibitor 7                                                                                | Enzyme-inhibitor, Antihypertensive                | García <i>et al.</i> , (2013) <sup>90</sup> ; Li <i>et al.</i> , (2002) <sup>173</sup> ; Puchalska <i>et al.</i> , (2015) <sup>298</sup>                                                                                                                             |
| <i>Fagopyrum tataricum</i>                                                                                                                             | Angiotensin I-converting enzyme inhibitor 11                                                                               | Enzyme-inhibitor, Antihypertensive, ACE-inhibitor | Lee & Hur, (2017) <sup>b171</sup> ; Li <i>et al.</i> , (2002) <sup>173</sup> ; Puchalska <i>et al.</i> , (2015) <sup>298</sup>                                                                                                                                       |
| <i>Fagopyrum tataricum</i>                                                                                                                             | Angiotensin I-converting enzyme inhibitor 8                                                                                | Enzyme-inhibitor, Antihypertensive, ACE-inhibitor | García <i>et al.</i> , (2013) <sup>90</sup> ; Lee & Hur, (2017) <sup>b171</sup> ; Li <i>et al.</i> , (2002) <sup>173</sup> ; Puchalska <i>et al.</i> , (2015) <sup>298</sup> ; Wang & Mejia, (2005) <sup>391</sup>                                                   |
| <i>Fagopyrum tataricum</i>                                                                                                                             | Trypsin inhibitor                                                                                                          | Antifungal                                        | Ruan <i>et al.</i> , (2011) <sup>307</sup>                                                                                                                                                                                                                           |
| <i>Fagopyrum tataricum</i> , <i>Zea mays</i> , <i>Triticum aestivum</i> , <i>Amaranthus hypochondriacus</i> , <i>Oryza sativa</i> , <i>Glycine max</i> | Angiotensin I-converting enzyme inhibitor 3                                                                                | Antihypertensive                                  | (García <i>et al.</i> , 2013; C. H. Li <i>et al.</i> , 2002; Nakahara <i>et al.</i> , 2010; Puchalska <i>et al.</i> , 2015; Silva-Sánchez <i>et al.</i> , 2008; Y. Yang <i>et al.</i> , 2007; Yokomizo <i>et al.</i> , 2002)                                         |
| <i>Fragaria ananassa</i>                                                                                                                               | Osmotin-like protein                                                                                                       | Antimicrobial                                     | Wu <i>et al.</i> , (2001) <sup>411</sup>                                                                                                                                                                                                                             |
| <i>Ginkgo biloba</i>                                                                                                                                   | Ginkbilobin                                                                                                                | Antibacterial, Antifungal, Antiviral, Anti-HIV    | Wang & Ng, (2000) <sup>381</sup>                                                                                                                                                                                                                                     |
| <i>Ginkgo biloba</i>                                                                                                                                   | Antifungal protein ginkbilobin-2                                                                                           | Antifungal                                        | Sawano <i>et al.</i> , (2007) <sup>314</sup>                                                                                                                                                                                                                         |
| <i>Gnetum parvifolium</i>                                                                                                                              | 50S ribosomal peptide L36                                                                                                  | Ribonucleoprotein                                 | Wu <i>et al.</i> , (2007) <sup>410</sup>                                                                                                                                                                                                                             |
| <i>Goniothalamus griffithii</i>                                                                                                                        | grifficyclacin A                                                                                                           | Anticancer                                        | Mu <i>et al.</i> , (2003) <sup>233</sup>                                                                                                                                                                                                                             |

|                                                                                   |                                                                                                                                          |                                                   |                                                                                                                                                        |
|-----------------------------------------------------------------------------------|------------------------------------------------------------------------------------------------------------------------------------------|---------------------------------------------------|--------------------------------------------------------------------------------------------------------------------------------------------------------|
| <i>Gossypium herbaceum</i>                                                        | Putative Rapid alkalization factor, RALF                                                                                                 | RALF-Rapid-alkalinization-factor                  | Pearce <i>et al.</i> , (2001) <sup>277</sup>                                                                                                           |
| <i>Griffithsia sp.</i>                                                            | Griffithsin                                                                                                                              | Antiviral                                         | Mori <i>et al.</i> , (2005) <sup>220</sup>                                                                                                             |
| <i>Gymnema sylvestre</i>                                                          | Gurmarin                                                                                                                                 | Taste                                             | Kamei <i>et al.</i> , (1992) <sup>144</sup> ; Ota & Ariyoshi, (1995) <sup>270</sup>                                                                    |
| <i>Gymnocladus chinensis</i>                                                      | Gymnin                                                                                                                                   | Antiviral, Anticancer, Antifungal                 | Wong & Ng, (2003) <sup>407</sup>                                                                                                                       |
| <i>Gynura pseudochina</i>                                                         | Gynurin                                                                                                                                  | Anticancer                                        | Chaichana <i>et al.</i> , (2019) <sup>36</sup>                                                                                                         |
| <i>Gypsophila oldhamiana</i>                                                      | Gyposophin                                                                                                                               | Enzyme-inhibitor                                  | Luo <i>et al.</i> , (2007) <sup>190</sup>                                                                                                              |
| <i>Helianthus annuus</i>                                                          | Ha-DEF1                                                                                                                                  | Antifungal                                        | Zélicourt <i>et al.</i> , (2007) <sup>435</sup>                                                                                                        |
| <i>Helianthus annuus</i>                                                          | 11S globulin seed storage protein G3 [308-325]                                                                                           | Enzyme-inhibitor, ACE-inhibitor, Antihypertensive | García <i>et al.</i> , (2013) <sup>90</sup> ; Megías <i>et al.</i> , (2004) <sup>210</sup> ; Yonder Haar <i>et al.</i> , (1988) <sup>431</sup>         |
| <i>Helianthus annuus</i> , <i>Helianthus argophyllus</i>                          | SFT-L1                                                                                                                                   | Trypsin-inhibitor                                 | Mylne <i>et al.</i> , (2011) <sup>238</sup>                                                                                                            |
| <i>Helianthus annuus</i> , <i>Helianthus exilis</i> , <i>Helianthus tuberosus</i> | SFTI-1                                                                                                                                   | Protease-inhibitor, digestion                     | Korsinczky <i>et al.</i> , (2001) <sup>154</sup> ; Mulvenna, Foley, <i>et al.</i> , (2005) <sup>234</sup>                                              |
| <i>Heliophila coronopifolia</i>                                                   | Antifungal peptide 1<br>Antifungal peptide 2<br>Antifungal peptide 3<br>Antifungal peptide 4<br>Hc-AFP1<br>Hc-AFP2<br>Hc-AFP3<br>Hc-AFP4 | Antifungal                                        | De Beer & Vivier, (2011) <sup>62</sup>                                                                                                                 |
| <i>Helleborus purpurascens</i>                                                    | Hellethionin-D                                                                                                                           | Antimicrobial, Toxin                              | Milbradt <i>et al.</i> , (2003) <sup>213</sup>                                                                                                         |
| <i>Helleborus purpurascens</i>                                                    | Hellethionin E<br>Hellethionin A                                                                                                         | Toxin                                             | Milbradt <i>et al.</i> , (2003) <sup>213</sup>                                                                                                         |
| <i>Heuchera sanguinea</i>                                                         | Defensin AFP1 / Hs-AFP1                                                                                                                  | Antibacterial, Antifungal, Antibiofilm            | Nawrot <i>et al.</i> , (2014) <sup>244</sup> ; Osborn <i>et al.</i> , (1995) <sup>267</sup>                                                            |
| <i>Heuchera sanguinea</i>                                                         | Hs-AFP 1                                                                                                                                 | Antimicrobial                                     | Hegedüs & Marx, (2013) <sup>122</sup> ; Osborn <i>et al.</i> , (1995) <sup>267</sup>                                                                   |
| <i>Hevea brasiliensis</i>                                                         | Fungal growth inhibitor, Pseudo-hevein                                                                                                   | Antimicrobial, Antifungal                         | Soedjanaatmadja <i>et al.</i> , (1994) <sup>332</sup>                                                                                                  |
| <i>Hevea brasiliensis</i>                                                         | Fungal growth inhibitor, Hevein, PR-4                                                                                                    | Antimicrobial, Antifungal                         | Broekaert <i>et al.</i> , (1990) <sup>26</sup> ; Prabhu <i>et al.</i> , (2013) <sup>295</sup> ; Rodríguez-Romero <i>et al.</i> , (1991) <sup>304</sup> |
| <i>Hordeum vulgare</i>                                                            | Leaf-specific thionin                                                                                                                    | Antimicrobial                                     | Bohlmann <i>et al.</i> , (1988) <sup>22</sup>                                                                                                          |
| <i>Hordeum vulgare</i>                                                            | Pathogenesis-related protein 1A/1B,<br>Pathogenesis-related protein 1C                                                                   | Antimicrobial                                     | Hahn <i>et al.</i> , (1993) <sup>106</sup>                                                                                                             |
| <i>Hybanthus calycinus</i>                                                        | Hyca A<br>Cyclotide A (Fragment)                                                                                                         | Antimicrobial                                     | Simonsen <i>et al.</i> , (2005) <sup>326</sup>                                                                                                         |
| <i>Hybanthus debilissimus</i>                                                     | Hyde A                                                                                                                                   | Antimicrobial                                     | Simonsen <i>et al.</i> , (2005) <sup>326</sup>                                                                                                         |

|                                |                                                                                                                                                                                                                                                |                                                 |                                                                                                                    |
|--------------------------------|------------------------------------------------------------------------------------------------------------------------------------------------------------------------------------------------------------------------------------------------|-------------------------------------------------|--------------------------------------------------------------------------------------------------------------------|
| <i>Hybanthus enneaspermus</i>  | Cyclotide A (Fragment)<br>Hyde A                                                                                                                                                                                                               | Antimicrobial                                   | Simonsen <i>et al.</i> , (2005) <sup>326</sup>                                                                     |
| <i>Hybanthus epacroides</i>    | Cyclotide A (Fragment)<br>Hyen B<br>Hyde A                                                                                                                                                                                                     | Antimicrobial                                   | Simonsen <i>et al.</i> , (2005) <sup>326</sup>                                                                     |
| <i>Hybanthus floribundus</i>   | Cyclotide A (Fragment)<br>Hyen B<br>Cyclotide B (Fragment)<br>Cyclotide Hyfl A<br>Cyclotide Hyfl B<br>Cyclotide Hyfl C<br>Cyclotide Hyfl D<br>Cyclotide Hyfl E<br>Cyclotide Hyfl F<br>Cyclotide Hyfl I<br>Cyclotide Hyfl J<br>Cyclotide Hyfl M | Insecticidal, Antimicrobial                     | Simonsen <i>et al.</i> , (2005) <sup>326</sup>                                                                     |
| <i>Hybanthus monopetalus</i>   | Hymo A<br>Cyclotide A (Fragment)<br>Hymo B<br>Cyclotide B (Fragment)                                                                                                                                                                           | Antimicrobial                                   | Simonsen <i>et al.</i> , (2005) <sup>326</sup>                                                                     |
| <i>Hybanthus parviflorus</i>   | Cyclotide hypa A                                                                                                                                                                                                                               | Antimicrobial                                   | Broussalis <i>et al.</i> , (2001) <sup>27</sup>                                                                    |
| <i>Hybanthus stellarioides</i> | Hyst A<br>Cyclotide A (Fragment)                                                                                                                                                                                                               | Antimicrobial                                   | Simonsen <i>et al.</i> , (2005) <sup>326</sup>                                                                     |
| <i>Hybanthus vernonii</i>      | Cyclotide A (Fragment)                                                                                                                                                                                                                         | Antimicrobial                                   | Simonsen <i>et al.</i> , (2005) <sup>326</sup>                                                                     |
| <i>Hydrangea macrophylla</i>   | Chitin-binding protein HM30 (Fragment)                                                                                                                                                                                                         | Antifungal                                      | Yang & Gong, (2002) <sup>419</sup>                                                                                 |
| <i>Impatiens balsamina</i>     | Basic peptide AMP4, Ib-AMP4                                                                                                                                                                                                                    | Antibacterial, Antifungal, Hemolytic, Cytotoxic | Tailor <i>et al.</i> , (1997) <sup>344</sup> ; Thevissen <i>et al.</i> , (2005) <sup>355</sup>                     |
| <i>Impatiens balsamina</i>     | Basic peptide AMP1-1, Ib-AMP1                                                                                                                                                                                                                  | Antibacterial, Antifungal                       | Tailor <i>et al.</i> , (1997) <sup>344</sup>                                                                       |
| <i>Impatiens balsamina</i>     | Basic peptide AMP2, Ib-AMP2                                                                                                                                                                                                                    | Antifungal, Hemolytic, Cytotoxic                | Tailor <i>et al.</i> , (1997) <sup>344</sup>                                                                       |
| <i>Impatiens balsamina</i>     | Basic peptide AMP3, Ib-AMP3                                                                                                                                                                                                                    | Antifungal                                      | Tailor <i>et al.</i> , (1997) <sup>344</sup>                                                                       |
| <i>Impatiens balsamina</i>     | Ib-AMP4                                                                                                                                                                                                                                        | Antibacterial, Hemolytic, Cytotoxic, Antifungal | (Gilevich <i>et al.</i> , 1986; Fan <i>et al.</i> , 2013; Patel <i>et al.</i> , 1998; Tailor <i>et al.</i> , 1997) |
| <i>Impatiens balsamina</i>     | Ib-AMP1, Ib-AMP2, Ib-AMP3                                                                                                                                                                                                                      | Antimicrobial, Antibacterial, Antifungal        | Patel <i>et al.</i> , (1998) <sup>275</sup> ; Tailor <i>et al.</i> , (1997) <sup>344</sup>                         |
| <i>Ipomoea batatas</i>         | Peptide IbACP                                                                                                                                                                                                                                  | RALF-Rapid-alkalinization-factor                | Chang <i>et al.</i> , (2013) <sup>38</sup>                                                                         |
| <i>Ipomoea nil</i>             | Pn-AMP2                                                                                                                                                                                                                                        | Antibacterial, Antifungal                       | Koo <i>et al.</i> , (1998) <sup>153</sup>                                                                          |

|                                                                                                     |                                       |                                 |                                                                                                |
|-----------------------------------------------------------------------------------------------------|---------------------------------------|---------------------------------|------------------------------------------------------------------------------------------------|
|                                                                                                     | Pn-AMP1                               |                                 |                                                                                                |
|                                                                                                     | PN-AMP1                               |                                 |                                                                                                |
|                                                                                                     | PN-AMP2                               |                                 |                                                                                                |
| <i>Jatropha curcas</i>                                                                              | Trypsin inhibitor 1 (JcTI-I)          | Antibacterial                   | Turner, (2014) <sup>364</sup>                                                                  |
| <i>Jatropha curcas</i>                                                                              | curcacycline A                        | Immunosuppressive               | van den Berg <i>et al.</i> , (1995) <sup>369</sup>                                             |
| <i>Jatropha curcas</i>                                                                              | jatrophidin I                         | Protease-inhibitor              | Altei <i>et al.</i> , (2014) <sup>3</sup>                                                      |
| <i>Jatropha curcas</i>                                                                              | curcacycline B                        | Immunosuppressive               | Auvin <i>et al.</i> , (1997) <sup>11</sup>                                                     |
| <i>Jatropha curcas</i>                                                                              | JCpep7                                | Antibacterial, Antifungal       | Kraszewska <i>et al.</i> , (2016) <sup>160</sup> ; Xiao <i>et al.</i> , (2011) <sup>415</sup>  |
| <i>Jatropha curcas</i>                                                                              | Curcacycline A                        | Immunoregulator                 | van den Berg <i>et al.</i> , (1995) <sup>369</sup>                                             |
| <i>Jatropha mahafalensis</i>                                                                        | mahafacyclin A                        | Antimalarial, Antiproliferative | Baraguey <i>et al.</i> , (2000) <sup>14</sup>                                                  |
| <i>Jatropha multifida</i>                                                                           | Labaditin                             | Immunomodulatory                | Kosasi <i>et al.</i> , (1989) <sup>155</sup>                                                   |
| <i>Jatropha multifida</i>                                                                           | Labaditin                             | Antimicrobial, Antibacterial    | Barbosa <i>et al.</i> , (2016) <sup>15</sup>                                                   |
| <i>Jatropha Podagrica</i>                                                                           | Podacycline B                         | Immunomodulatory                | Berg <i>et al.</i> , (1996) <sup>18</sup>                                                      |
|                                                                                                     | Podacycline A                         |                                 |                                                                                                |
| <i>Jatropha pohliana</i>                                                                            | pohlianin C                           | Antiparasitic                   | Auvin-Guette <i>et al.</i> , (1999) <sup>10</sup>                                              |
|                                                                                                     | pohlianin A                           |                                 |                                                                                                |
|                                                                                                     | pohlianin B                           |                                 |                                                                                                |
| <i>Jatropha ribifolia</i>                                                                           | ribifolin                             | Cytotoxic                       | Pinto <i>et al.</i> , (2015) <sup>284</sup>                                                    |
| <i>Juglans regia</i>                                                                                | Seed storage protein                  | ACE-inhibitor                   | Wang <i>et al.</i> , (2018) <sup>380</sup>                                                     |
|                                                                                                     | Legumin OS                            |                                 |                                                                                                |
| <i>Lagenaria luecantha</i> Rusby<br>var. <i>Depressa makina</i> , <i>Luffa</i><br><i>cylindrica</i> | Trypsin inhibitor LLDTI-I             | Enzyme-inhibitor                | Matsuo <i>et al.</i> , (1992) <sup>206</sup>                                                   |
| <i>Lagenaria luecantha</i> Rusby<br>var. <i>Gourda makina</i> ,<br><i>Lagenaria siceraria</i>       | Protease inhibitor LLTI-III           | Enzyme-inhibitor                | Hayashi <i>et al.</i> , (1994) <sup>117</sup>                                                  |
| <i>Lagenaria luecantha</i> Rusby<br>var. <i>Gourda makina</i> ,<br><i>Lagenaria siceraria</i>       | Trypsin inhibitor LLTI-I              | Enzyme-inhibitor                | Takeshi, (1977) <sup>346</sup>                                                                 |
| <i>Lagenaria siceraria</i>                                                                          | Trypsin inhibitor LLTI-II             |                                 |                                                                                                |
| <i>Lagenaria luecantha</i> Rusby<br>var. <i>Gourda makina</i> ,<br><i>Lagenaria siceraria</i>       | Trypsin inhibitor LLTI-III            | Enzyme-inhibitor                | Hayashi <i>et al.</i> , (1994) <sup>117</sup>                                                  |
| <i>Lens culinaris</i>                                                                               | Protease inhibitor LLTI-III           |                                 |                                                                                                |
|                                                                                                     | Non-specific lipid-transfer protein 6 | Antibacterial                   | Finkina <i>et al.</i> , (2007) <sup>76</sup>                                                   |
|                                                                                                     | Non-specific lipid-transfer protein 4 |                                 |                                                                                                |
|                                                                                                     | Non-specific lipid-transfer protein 5 |                                 |                                                                                                |
|                                                                                                     | Non-specific lipid-transfer protein 2 |                                 |                                                                                                |
| <i>Lens culinaris</i>                                                                               | Defensin Lc-def                       | Antibacterial, Antifungal       | Finkina <i>et al.</i> , (2008) <sup>77</sup> ; Shenkarev <i>et al.</i> , (2014) <sup>321</sup> |

|                                                                                     |  |                                          |                                       |                   |                                                                                                                                                                                                        |
|-------------------------------------------------------------------------------------|--|------------------------------------------|---------------------------------------|-------------------|--------------------------------------------------------------------------------------------------------------------------------------------------------------------------------------------------------|
| <i>Lens culinaris</i>                                                               |  | lentil peptides                          | ACE-inhibitor                         |                   | García-Mora <i>et al.</i> , (2017) <sup>88</sup>                                                                                                                                                       |
| <i>Leonia cymosa</i>                                                                |  | Cycloviolin D                            | Antimicrobial, Antiviral, Anti-HIV    |                   | Hallock <i>et al.</i> , (2000) <sup>108</sup>                                                                                                                                                          |
|                                                                                     |  | Cycloviolin A                            |                                       |                   |                                                                                                                                                                                                        |
|                                                                                     |  | Cycloviolin C                            |                                       |                   |                                                                                                                                                                                                        |
|                                                                                     |  | Cycloviolin B                            |                                       |                   |                                                                                                                                                                                                        |
| <i>Leonurus heterophyllus</i>                                                       |  | Cycloleonuripeptide E                    | Neuropeptide                          |                   | Morita, Iizuka, <i>et al.</i> , (2006) <sup>225</sup>                                                                                                                                                  |
|                                                                                     |  | Cycloleonuripeptide F                    |                                       |                   |                                                                                                                                                                                                        |
| <i>Leonurus japonicus</i>                                                           |  | Cycloleonuripeptide D                    | Cyclooxygenase-inhibitor              |                   | Morita, Gonda, Takeya, Itokawa, & Iitaka, (1997) <sup>223</sup>                                                                                                                                        |
| <i>Leonurus japonicus</i>                                                           |  | Cycloleonuripeptide B                    | Anticancer                            |                   | García-Mora <i>et al.</i> , (2017) <sup>88</sup>                                                                                                                                                       |
|                                                                                     |  | Cycloleonuripeptide A                    |                                       |                   |                                                                                                                                                                                                        |
| <i>Leonurus japonicus</i> , <i>Leonorus sibiricus</i>                               |  | Cycloleonurinin                          | Immunosuppressive                     |                   | Morita, Gonda, Takeya, Itokawa, Hirano, <i>et al.</i> , (1997) <sup>222</sup>                                                                                                                          |
| <i>Leptopetalum biflorum</i> , <i>Hedyotis biflora</i>                              |  | Hedyotide B2                             | Antimicrobial, degradation            | Enzymatic-        | Nguyen, Zhang, Wang, <i>et al.</i> , (2011) <sup>253</sup>                                                                                                                                             |
| <i>Leptopetalum biflorum</i> , <i>Hedyotis biflora</i>                              |  | Hedyotide B1                             | Antimicrobial, degradation            | Enzymatic-        | Nguyen, Zhang, Wang, <i>et al.</i> , (2011) <sup>253</sup> ; Wong <i>et al.</i> , (2011) <sup>406</sup>                                                                                                |
| <i>Linum usitatissimum</i>                                                          |  | Cyclolinopeptide G                       | Immunosuppressive                     |                   | Matsumoto <i>et al.</i> , (2001) <sup>205</sup>                                                                                                                                                        |
| <i>Lippia sidoides</i>                                                              |  | Putative antimicrobial peptide 2         | Antifungal                            |                   | Moreira <i>et al.</i> , (2011) <sup>219</sup>                                                                                                                                                          |
| <i>Luffa acutangula</i>                                                             |  | Trypsin inhibitor LATI-I                 | Enzyme-inhibitor                      |                   | Haldar <i>et al.</i> , (1996) <sup>107</sup>                                                                                                                                                           |
|                                                                                     |  | Trypsin inhibitor LATI-II                |                                       |                   |                                                                                                                                                                                                        |
| <i>Luffa aegyptiaca</i>                                                             |  | Ribosome-inactivating protein luffacylin | Antifungal                            |                   | Parkash <i>et al.</i> , (2002) <sup>274</sup>                                                                                                                                                          |
| <i>Luffa cylindrica</i>                                                             |  | Trypsin inhibitor TGTI-II                | Enzyme-inhibitor                      |                   | Ling <i>et al.</i> , (1993) <sup>181</sup>                                                                                                                                                             |
| <i>Luffa cylindrica</i>                                                             |  | Luffin P1c                               | Ribosome-inactivating                 |                   | Li <i>et al.</i> , (2003) <sup>176</sup>                                                                                                                                                               |
| <i>Luffa cylindrica</i>                                                             |  | Trypsin inhibitor TGTI-I                 | Enzyme-inhibitor                      |                   | Ling <i>et al.</i> , (1993) <sup>181</sup>                                                                                                                                                             |
| <i>Luffa cylindrica</i>                                                             |  | Protease inhibitor LCTI-III              | Enzyme-inhibitor                      |                   | Hayashi <i>et al.</i> , (1994) <sup>117</sup>                                                                                                                                                          |
| <i>Luffa cylindrica</i>                                                             |  | Trypsin inhibitor LCTI-I                 | Enzyme-inhibitor                      |                   | Hatakeyama <i>et al.</i> , (1991) <sup>115</sup>                                                                                                                                                       |
|                                                                                     |  | Trypsin inhibitor LCTI-II                |                                       |                   |                                                                                                                                                                                                        |
| <i>lycine max</i> , <i>Amaranthus hypochondriacus</i> , <i>Fagopyrum esculentum</i> |  | Diffusable bitter peptide 2              | Taste, Neuropeptide, Antihypertensive | Enzyme-inhibitor, | Cavazos & Gonzalez de Mejia, (2013) <sup>34</sup> ; Puchalska <i>et al.</i> , (2015) <sup>298</sup> ; Silva-Sánchez <i>et al.</i> , (2008) <sup>325</sup> ; Yano <i>et al.</i> , (1996) <sup>423</sup> |
| <i>Lycopersicon esculentum</i>                                                      |  | gamma-Thionin-like peptide TPP3          | Antimicrobial                         |                   | Milligan & Gasser, (1995) <sup>214</sup>                                                                                                                                                               |
| <i>Lycopersicon esculentum</i>                                                      |  | Metalloproteinase inhibitor-37, MCPI-37  | Enzyme-inhibitor                      |                   | Hass & Hermodson, (1981) <sup>114</sup> ; Martineau <i>et al.</i> , (1991) <sup>200</sup>                                                                                                              |
| <i>Lycopersicon esculentum</i> , <i>Solanum chacoense</i>                           |  | Putative Rapid alkalization factor, RALF | RALF-Rapid-alkalinization-factor      |                   | Pearce <i>et al.</i> , (2001) <sup>277</sup>                                                                                                                                                           |
| <i>Macadamia integrifolia</i>                                                       |  | Vicin-like antimicrobial peptide 2a      | Antibacterial, Antifungal             |                   | Marcus <i>et al.</i> , (1999) <sup>198</sup>                                                                                                                                                           |
|                                                                                     |  | Vicin-like antimicrobial peptide 2c-1    |                                       |                   |                                                                                                                                                                                                        |

|                                      |                                                                 |                                      |  |                                                                                                                                                                                          |
|--------------------------------------|-----------------------------------------------------------------|--------------------------------------|--|------------------------------------------------------------------------------------------------------------------------------------------------------------------------------------------|
|                                      | Vicin-like antimicrobial peptide 2c-2                           |                                      |  |                                                                                                                                                                                          |
|                                      | Vicin-like antimicrobial peptide 2c-3                           |                                      |  |                                                                                                                                                                                          |
|                                      | MiAMP2d                                                         |                                      |  |                                                                                                                                                                                          |
|                                      | Vicilin-like Antimicrobial peptide 2c-1 /                       |                                      |  |                                                                                                                                                                                          |
|                                      | MiAMP2c-1                                                       |                                      |  |                                                                                                                                                                                          |
| <i>Macadamia integrifolia</i>        | MiAMP1                                                          | Antibacterial, Antifungal, Antiyeast |  | Marcus <i>et al.</i> , (1997) <sup>197</sup> ; McManus <i>et al.</i> , (1999) <sup>208</sup>                                                                                             |
| <i>Maclura pomifera</i>              | peptide sequences-one, YQEPVLGPVRGPFPIIV, the other, RFFVAPFPE, | ACE-inhibitor                        |  | Corrons <i>et al.</i> , (2017) <sup>55</sup>                                                                                                                                             |
| <i>Malus domestica</i>               | Thaumatococin-like protein                                      | Antimicrobial                        |  | Krebitz <i>et al.</i> , (2003) <sup>161</sup>                                                                                                                                            |
| <i>Malva parviflora</i>              | Antifungal protein 1 small subunit                              | Antifungal                           |  | Wang & Bunkers, (2000) <sup>392</sup>                                                                                                                                                    |
|                                      | Antifungal protein 2 large subunit                              |                                      |  |                                                                                                                                                                                          |
|                                      | Antifungal protein 2 small subunit                              |                                      |  |                                                                                                                                                                                          |
|                                      | Antifungal protein 1 large subunit                              |                                      |  |                                                                                                                                                                                          |
|                                      | Antifungal protein 4                                            |                                      |  |                                                                                                                                                                                          |
|                                      | Antifungal protein 5                                            |                                      |  |                                                                                                                                                                                          |
| <i>Malva parviflora</i>              | Antifungal protein 3                                            | Antifungal                           |  | Wang <i>et al.</i> , (2001) <sup>393</sup>                                                                                                                                               |
| <i>Medicago sativa</i>               | MsDef1 (defensin 1.3)                                           | Antifungal                           |  | Gao <i>et al.</i> , (2000) <sup>87</sup> ; Hanks <i>et al.</i> , (2005) <sup>110</sup> ; Sagaram <i>et al.</i> , (2011) <sup>309</sup> ; Spelbrink <i>et al.</i> , (2004) <sup>336</sup> |
| <i>Medicago sativa</i>               | Antifungal peptide                                              | Antimicrobial, Antifungal            |  | Gao <i>et al.</i> , (2000) <sup>87</sup>                                                                                                                                                 |
| <i>Melicytus chathamicus</i>         | Mech 1                                                          | Cytotoxic, Antibacterial             |  | Ravipati <i>et al.</i> , (2015) <sup>300</sup>                                                                                                                                           |
|                                      | Mech 2                                                          | Anticancer                           |  |                                                                                                                                                                                          |
|                                      | Mech 3                                                          |                                      |  |                                                                                                                                                                                          |
|                                      | Mech 4                                                          |                                      |  |                                                                                                                                                                                          |
|                                      | Mech 5                                                          |                                      |  |                                                                                                                                                                                          |
|                                      | Mech 6                                                          |                                      |  |                                                                                                                                                                                          |
|                                      | Mech 7                                                          |                                      |  |                                                                                                                                                                                          |
| <i>Melicytus latifolius</i>          | Mela 1                                                          | Antibacterial, Anticancer, Cytotoxic |  | Ravipati <i>et al.</i> , (2015) <sup>300</sup>                                                                                                                                           |
|                                      | Mela 2                                                          |                                      |  |                                                                                                                                                                                          |
|                                      | Mela 3                                                          |                                      |  |                                                                                                                                                                                          |
|                                      | Mela 4                                                          |                                      |  |                                                                                                                                                                                          |
|                                      | Mela 5                                                          |                                      |  |                                                                                                                                                                                          |
|                                      | Mela 6                                                          |                                      |  |                                                                                                                                                                                          |
|                                      | Mela 7                                                          |                                      |  |                                                                                                                                                                                          |
| <i>Mesembryanthemum crystallinum</i> | Putative Rapid alkalization factor,                             | RALF-Rapid-alkalinization-factor     |  | Pearce <i>et al.</i> , (2001) <sup>277</sup>                                                                                                                                             |
|                                      | RALF                                                            |                                      |  |                                                                                                                                                                                          |
| <i>Mesembryanthemum</i>              | Mc-AMP1                                                         | Antibacterial, Antifungal            |  | Cammue <i>et al.</i> , (1992) <sup>29</sup> ; De Bolle <i>et al.</i> , (1995) <sup>64</sup>                                                                                              |

|                                                                                                      |                                                                                                                       |  |  |                                                           |                                                                                                                                                                                   |
|------------------------------------------------------------------------------------------------------|-----------------------------------------------------------------------------------------------------------------------|--|--|-----------------------------------------------------------|-----------------------------------------------------------------------------------------------------------------------------------------------------------------------------------|
| <i>crystallinum</i>                                                                                  |                                                                                                                       |  |  |                                                           |                                                                                                                                                                                   |
| <i>Microtoena prainiana</i>                                                                          | Microtoenin C<br>Microtoenin A<br>Microtoenin B                                                                       |  |  | ACE-inhibitor                                             | Li <i>et al.</i> , (2004) <sup>175</sup>                                                                                                                                          |
| <i>Mirabilis jalapa</i>                                                                              | Antimicrobial peptide 1, MJ-AMP1, AMP1                                                                                |  |  | Antibacterial, Antifungal, Hemolytic, Cytotoxic           | Cammue <i>et al.</i> , (1992) <sup>29</sup>                                                                                                                                       |
| <i>Mirabilis jalapa</i>                                                                              | MJ-AMP2                                                                                                               |  |  | Antibacterial, Antifungal, Hemolytic, Cytotoxic           | Cammue <i>et al.</i> , (1992) <sup>29</sup> ; De Bolle <i>et al.</i> , (1995) <sup>64</sup> ; Gristwood, (1990) <sup>100</sup> ; Kraszewska <i>et al.</i> , (2016) <sup>160</sup> |
| <i>Mirabilis jalapa</i>                                                                              | Trypsin inhibitor, MJTI I                                                                                             |  |  | Enzyme-inhibitor                                          | Kowalska <i>et al.</i> , (2007) <sup>157</sup>                                                                                                                                    |
| <i>Mirabilis jalapa</i>                                                                              | Antimicrobial peptide Mj-AMP1                                                                                         |  |  | Antimicrobial, Antibacterial, Antifungal                  | Cammue <i>et al.</i> , (1992) <sup>29</sup>                                                                                                                                       |
| <i>Momordica charantia</i>                                                                           | Elastase inhibitor MCEI-IV<br>Elastase inhibitor MCEI-III<br>Trypsin inhibitor MCTI-III<br>Elastase inhibitor MCEI-II |  |  | Enzyme-inhibitor                                          | Hamato <i>et al.</i> , (1995) <sup>109</sup>                                                                                                                                      |
| <i>Momordica charantia</i>                                                                           | Trypsin inhibitor MCTI-I                                                                                              |  |  | Enzyme-inhibitor                                          | Hara <i>et al.</i> , (1989) <sup>111</sup>                                                                                                                                        |
| <i>Momordica charantia</i>                                                                           | Inhibitor cystine knot peptide MCh-2<br>Inhibitor cystine knot peptide MCh-1                                          |  |  | Enzyme-inhibitor                                          | He <i>et al.</i> , (2013) <sup>120</sup>                                                                                                                                          |
| <i>Momordica charantia</i>                                                                           | Protease inhibitor MCTI-III<br>Protease inhibitor MCTI-I                                                              |  |  | Enzyme-inhibitor                                          | He <i>et al.</i> , (2013) <sup>120</sup>                                                                                                                                          |
| <i>Momordica cochinchinensis</i>                                                                     | McoTI-VII<br>McoTI-IV<br>McoTI-VIII<br>McoTI-III<br>McoTI-V<br>McoTI-VI                                               |  |  | Protease-inhibitor                                        | Mylne <i>et al.</i> , (2012) <sup>237</sup>                                                                                                                                       |
| <i>Momordica cochinchinensis</i>                                                                     | MCoTI-I, Two inhibitor peptide topologies 1 (21-54)                                                                   |  |  | Antibacterial, Anticancer, Antifungal, Protease-inhibitor | Avrutina <i>et al.</i> , (2005) <sup>12</sup> ; Strömstedt <i>et al.</i> , (2017) <sup>a338</sup>                                                                                 |
| <i>Momordica cochinchinensis</i>                                                                     | Peptide MCo-6<br>Peptide MCo-3                                                                                        |  |  | Antimicrobial                                             | Chan <i>et al.</i> , (2013) <sup>37</sup>                                                                                                                                         |
| <i>Momordica cochinchinensis</i> ,<br><i>Momordica macrophylla</i> ,<br><i>Momordica sphaeroidea</i> | MCoTI-II, Two inhibitor peptide topologies 2 (121-154)                                                                |  |  | Antibacterial, Anticancer, Antifungal                     | Heitz <i>et al.</i> , (2001) <sup>123</sup> ; Strömstedt <i>et al.</i> , (2017) <sup>a338</sup>                                                                                   |
| <i>Moringa oleifera</i>                                                                              | Morintides (mO2)<br>Morintides (mO1)<br>Chitin-binding protein 3                                                      |  |  | Antifungal                                                | Kini <i>et al.</i> , (2017) <sup>150</sup>                                                                                                                                        |
| <i>Morus alba</i>                                                                                    | Germin-like protein                                                                                                   |  |  | Antibacterial, Antifungal                                 | Patnaik <i>et al.</i> , (2012) <sup>276</sup>                                                                                                                                     |

|                                                       |                                                |                                                       |                                                                                                                                                                                          |
|-------------------------------------------------------|------------------------------------------------|-------------------------------------------------------|------------------------------------------------------------------------------------------------------------------------------------------------------------------------------------------|
| <i>Morus sp.</i>                                      | Hevein-like peptide 2<br>Hevein-like peptide 1 | Antimicrobial, Antifungal                             | Wasano <i>et al.</i> , (2009) <sup>395</sup>                                                                                                                                             |
| <i>Mucuna pruriens</i>                                | peptide fraction (PF)                          | Antihypertensive, Antithrombotic, Hypocholesterolemic | Antioxidant, Herrera-Chalé <i>et al.</i> , (2016) <sup>126</sup>                                                                                                                         |
| <i>Nicotiana glauca</i>                               | Class I defensin, NaD2                         | Anticancer, Antifungal                                | Bleackley <i>et al.</i> , (2016) <sup>19</sup> ; Dracatos <i>et al.</i> , (2014) <sup>66</sup>                                                                                           |
| <i>Nicotiana glauca</i>                               | Flower-specific defensin / NaD1                | Anticancer, Antifungal, Insecticidal                  | Bleackley <i>et al.</i> , (2016) <sup>19</sup> ; Dracatos <i>et al.</i> , (2014) <sup>66</sup> ; Hayes <i>et al.</i> , (2013) <sup>118</sup> ; Lay <i>et al.</i> , (2003) <sup>166</sup> |
| <i>Nicotiana glauca</i>                               | Fabatin-1                                      | Antimicrobial                                         | Weinhold <i>et al.</i> , (2015) <sup>396</sup>                                                                                                                                           |
| <i>Nicotiana glauca</i>                               | Esculentin-1                                   | Antimicrobial                                         | Weinhold <i>et al.</i> , (2015) <sup>396</sup>                                                                                                                                           |
| <i>Nicotiana glauca</i>                               | Spheniscin-2                                   | Antibacterial, Antifungal                             | Weinhold <i>et al.</i> , (2015) <sup>396</sup>                                                                                                                                           |
| <i>Nicotiana glauca</i>                               | SP1-1                                          | Antimicrobial                                         | Zeitler <i>et al.</i> , (2013) <sup>434</sup>                                                                                                                                            |
| <i>Nicotiana glauca</i>                               | NmDef02                                        | Antifungal, Antimicrobial                             | Portieles <i>et al.</i> , (2010) <sup>291</sup>                                                                                                                                          |
| <i>Nicotiana glauca</i>                               | Osmotin                                        | Antimicrobial                                         | Woloshuk <i>et al.</i> , (1991) <sup>405</sup>                                                                                                                                           |
| <i>Nicotiana glauca</i>                               | Pathogenesis-related protein R minor form      | Antimicrobial                                         | Cornelissen <i>et al.</i> , (1986) <sup>54</sup>                                                                                                                                         |
| <i>Nicotiana glauca</i>                               | Cecropin A-melittin hybrid                     | Antimicrobial                                         | Yevtushenko <i>et al.</i> , (2005) <sup>427</sup>                                                                                                                                        |
| <i>Nicotiana glauca</i> , <i>Nicotiana glauca</i>     | Rapid alkalinization factor, RALF              | RALF-Rapid-alkalinization-factor                      | Pearce <i>et al.</i> , (2001) <sup>277</sup>                                                                                                                                             |
| <i>Nicotiana glauca</i>                               | Defensin D2, Ns-D2                             | Antibacterial, Antifungal                             | Rogozhin <i>et al.</i> , (2011) <sup>305</sup>                                                                                                                                           |
| <i>Nicotiana glauca</i>                               | Defensin D1, Ns-D1                             | Antifungal                                            | Oshchepkova <i>et al.</i> , (2009) <sup>268</sup>                                                                                                                                        |
| <i>Nicotiana glauca</i>                               | Non-specific lipid-transfer protein 1          | Enzymatic-degradation, Antimicrobial                  | Bobey <i>et al.</i> , (2018) <sup>21</sup> ; Serra <i>et al.</i> , (2016) <sup>317</sup>                                                                                                 |
| <i>Nicotiana glauca</i>                               | NorA/ cliotide T55                             | Antimicrobial                                         |                                                                                                                                                                                          |
| <i>Oldenlandia affinis</i>                            | Cyclotide Oak10 (Fragment)                     | Antimicrobial                                         | Mylne <i>et al.</i> , (2010) <sup>239</sup>                                                                                                                                              |
| <i>Oldenlandia affinis</i>                            | Cyclotide Oak9 (Fragment)                      |                                                       |                                                                                                                                                                                          |
| <i>Oldenlandia affinis</i>                            | Cyclotide Oak8 (Fragment)                      |                                                       |                                                                                                                                                                                          |
| <i>Oldenlandia affinis</i>                            | Kalata-B1 precursor                            | Antibacterial, Antifungal                             | Tam <i>et al.</i> , (1999) <sup>347</sup>                                                                                                                                                |
| <i>Oldenlandia affinis</i>                            | Kalata B6                                      | Antimicrobial, Antiparasitic                          | Kamimori <i>et al.</i> , (2005) <sup>145</sup>                                                                                                                                           |
| <i>Oldenlandia affinis</i>                            | kalata B15                                     | Antimicrobial, Insecticidal                           | M. R. R. Plan <i>et al.</i> , (2007) <sup>288</sup>                                                                                                                                      |
| <i>Oldenlandia affinis</i>                            | kalata B14                                     |                                                       |                                                                                                                                                                                          |
| <i>Oldenlandia affinis</i>                            | kalata B11                                     |                                                       |                                                                                                                                                                                          |
| <i>Oldenlandia affinis</i>                            | Kalata-B4                                      | Antimicrobial, Insecticidal                           | Craik <i>et al.</i> , (1999) <sup>56</sup> ; Plan <i>et al.</i> , (2007) <sup>288</sup> ; Trabi & Craik, (2004) <sup>361</sup>                                                           |
| <i>Olea europaea</i>                                  | ACE inhibitor from <i>Olea europaea</i>        | ACE-inhibitor                                         | Esteve <i>et al.</i> , (2015) <sup>72</sup>                                                                                                                                              |
| <i>Olea europaea</i>                                  | Antioxidant peptide from <i>Olea europaea</i>  | Antioxidant                                           | Esteve <i>et al.</i> , (2015) <sup>72</sup>                                                                                                                                              |
| <i>Opuntia streptacantha</i> , <i>Opuntia cardona</i> | Trypsin inhibitor 2                            | Enzyme-inhibitor                                      | Torres-Castillo <i>et al.</i> , (2009) <sup>360</sup>                                                                                                                                    |

|                                                      |                                                                                                        |                                                                                                         |                                                                                            |
|------------------------------------------------------|--------------------------------------------------------------------------------------------------------|---------------------------------------------------------------------------------------------------------|--------------------------------------------------------------------------------------------|
| <i>Oryza sativa</i> subsp. <i>Indica</i>             | Thionin                                                                                                | Antimicrobial                                                                                           | Experimental evidence at transcript level                                                  |
| <i>Oryza sativa</i> subsp. <i>Japonica</i>           | Thaumatococin-like protein                                                                             | Antimicrobial                                                                                           | Experimental evidence at transcript level                                                  |
| <i>Ostreococcus tauri</i>                            | Histone chaperone involved in gene silencing, ISS                                                      | Chromatin-assembly-or-disassembly                                                                       | McAdams, (2006) <sup>207</sup>                                                             |
| <i>Pachyrhizus erosus</i>                            | Defensin SPE10                                                                                         | Antimicrobial, Antifungal                                                                               | Song <i>et al.</i> , (2005) <sup>334</sup>                                                 |
| <i>Palicourea condensata</i>                         | Palicourein                                                                                            | Antiviral, Anti-HIV                                                                                     | Barry <i>et al.</i> , (2004) <sup>17</sup> ; Bokesch <i>et al.</i> , (2001) <sup>24</sup>  |
| <i>Palicourea rigida</i>                             | Parigidin-br1                                                                                          | Antibacterial, Insecticidal                                                                             | Pinto <i>et al.</i> , (2012) <sup>286</sup>                                                |
| <i>Panicum laxum</i>                                 | Panitide L2                                                                                            | Antimicrobial                                                                                           | Nguyen <i>et al.</i> , (2013) <sup>250</sup>                                               |
| <i>Panicum laxum</i>                                 | Panitide L3, Panitide L7, Panitide L2, Panitide L5, Panitide L6, Panitide L4, Panitide L8, Panitide L1 | Antimicrobial, Cytotoxic                                                                                | Nguyen, Zhang, Nguyen, <i>et al.</i> , (2011) <sup>252</sup>                               |
| <i>Passiflora alata</i>                              | Antifungal protein 1                                                                                   | Antifungal                                                                                              | Ribeiro <i>et al.</i> , (2011) <sup>303</sup>                                              |
| <i>Passiflora edulis</i>                             | Antifungal protein 1                                                                                   | Antifungal                                                                                              | Pelegri <i>et al.</i> , (2006) <sup>281</sup>                                              |
| <i>Pentadiplandra brazzeana</i>                      | Brazzein                                                                                               | Antibacterial, Antifungal                                                                               | Yount & Yeaman, (2004) <sup>432</sup>                                                      |
| <i>Perilla frutescens</i>                            | Tyr-Leu (YL) and Phe-Tyr (FY)                                                                          | Antihypertensive, Antioxidant                                                                           | J. Yang <i>et al.</i> , (2018) <sup>418</sup>                                              |
| <i>Persea americana</i> var. <i>drymifolia</i>       | PaDef                                                                                                  | Antimicrobial                                                                                           | Guzmán-Rodríguez <i>et al.</i> , (2013) <sup>104</sup>                                     |
| <i>Petunia hybrida</i>                               | Floral defensin-like protein 1 / PhD1                                                                  | Antibacterial, Antifungal                                                                               | Janssen <i>et al.</i> , (2003) <sup>139</sup> ; Lay <i>et al.</i> , (2003) <sup>166</sup>  |
| <i>Petunia hybrida</i>                               | Expression of defensive gene activator, PhHypSys III                                                   | Gene-expression-activator                                                                               | Pearce <i>et al.</i> , (2007) <sup>278</sup>                                               |
| <i>Petunia inflata</i> , <i>Petunia integrifolia</i> | Gamma-thionin homolog PPT                                                                              | Antimicrobial                                                                                           | Karunanandaa <i>et al.</i> , (1994) <sup>146</sup>                                         |
| <i>Petunia x hybrida</i> , <i>Petunia axillaris</i>  | Phyb I                                                                                                 | Insecticidal                                                                                            | Poth <i>et al.</i> , (2012) <sup>294</sup>                                                 |
| <i>Pharbitis nil</i>                                 | Antifungal peptide PN-AMP2<br>Antifungal peptide PN-AMP1<br>PN-AMP2<br>PN-AMP1                         | Antimicrobial, Antibacterial, Antifungal                                                                | Koo <i>et al.</i> , (1998) <sup>153</sup>                                                  |
| <i>Pharbitis nil</i>                                 | Antifungal peptide pnAMP-h1<br>Antifungal peptide pnAMP-h2                                             | Antimicrobial, Antibacterial, Antifungal                                                                | Koo <i>et al.</i> , (2002) <sup>152</sup>                                                  |
| <i>Phaseolus aureus</i> , <i>Vigna radiata</i>       | Pa-LTP1                                                                                                | Antibacterial, Antifungal                                                                               | Lin <i>et al.</i> , (2005) <sup>179</sup> ; Wang <i>et al.</i> , (2004) <sup>390</sup>     |
| <i>Phaseolus coccineus</i>                           | Coccinin                                                                                               | Antiviral, Anticancer, Antifungal, Hemolytic, Antiproliferative, HIV-1-reverse-transcriptase-inhibition | Guzmán-Rodríguez <i>et al.</i> , (2015) <sup>105</sup> ; Ngai & Ng, (2004) <sup>c249</sup> |
| <i>Phaseolus limensis</i>                            | Limylin                                                                                                | Antimicrobial, Anticancer, Antifungal                                                                   | Hegedüs & Marx, (2013) <sup>122</sup>                                                      |

|                                                      |                                                   |                                   |                        |                                                                                                   |
|------------------------------------------------------|---------------------------------------------------|-----------------------------------|------------------------|---------------------------------------------------------------------------------------------------|
| <i>Phaseolus lunatus</i> , <i>Phaseolus limensis</i> | Defensin-like peptide, Limentin                   | Antimicrobial, Antifungal         | Antibacterial,         | Wong & Ng, (2006) <sup>408</sup>                                                                  |
| <i>Phaseolus vulgaris</i>                            | White cloud bean defensin                         | Antibacterial, Antifungal         | Antiviral, Anticancer, | Wong <i>et al.</i> , (2006) <sup>409</sup>                                                        |
| <i>Phaseolus vulgaris</i>                            | PvD1                                              | Antifungal                        |                        | Games <i>et al.</i> , (2008) <sup>86</sup>                                                        |
| <i>Phaseolus vulgaris</i>                            | PTA2c, pinto bean antifungal peptide, Defensin D1 | Antiviral, Antifungal             |                        | Ye & Ng, (2001) <sup>424</sup>                                                                    |
| <i>Phaseolus vulgaris</i>                            | ntifungal lectin PVAP                             | Antiviral, Anticancer, Antifungal |                        | Xia & Ng, (2005) <sup>a412</sup>                                                                  |
| <i>Phaseolus vulgaris</i>                            | gamma-glutamyl-cysteinyl-alanine                  | Taste                             |                        | Dunkel <i>et al.</i> , (2007) <sup>67</sup>                                                       |
| <i>Phaseolus vulgaris</i>                            | Defensin PvD1                                     | Antimicrobial, Antifungal         |                        | Games <i>et al.</i> , (2008) <sup>86</sup>                                                        |
| <i>Phaseolus vulgaris</i>                            | gamma-glutamyl-leucine                            | Taste, ACE-inhibitor              |                        | Dunkel <i>et al.</i> , (2007) <sup>67</sup> ; Gu & Wu, (2013) <sup>101</sup>                      |
| <i>Phellodendron amurense</i>                        | Glutathione S-transferase-activating peptide      | Enzyme-inhibitor                  |                        | Lee <i>et al.</i> , (2006) <sup>169</sup>                                                         |
| <i>Phleum pratense</i>                               | phl p 4                                           | Allergen                          |                        | Fischer <i>et al.</i> , (1996) <sup>78</sup>                                                      |
| <i>Phoradendron liga</i>                             | Ligatoxin-A                                       | Antimicrobial                     |                        | (Thunberg <i>et al.</i> , 1982)                                                                   |
| <i>Phoradendron liga</i>                             | Ligatoxin-B                                       | Anticancer, Toxin                 |                        | Guzmán-Rodríguez <i>et al.</i> , (2015) <sup>105</sup> ; Li <i>et al.</i> , (2002) <sup>177</sup> |
| <i>Phoradendron tomentosum</i>                       | Phoratoxin                                        | Antimicrobial, Toxin              |                        | (Mellstrand <i>et al.</i> , 1974ab)                                                               |
| <i>Phoradendron tomentosum</i>                       | Phoratoxin C                                      | Toxin                             |                        | Johansson <i>et al.</i> , (2003) <sup>142</sup>                                                   |
| <i>Phoradendron tomentosum</i>                       | Phoratoxin E                                      |                                   |                        |                                                                                                   |
| <i>Phoradendron tomentosum</i>                       | VtB                                               | Antifungal                        |                        | Giudici <i>et al.</i> , (2004) <sup>97</sup>                                                      |
| <i>Phoradendron tomentosum</i>                       | Phoratoxins B                                     | Anticancer                        |                        | Guzmán-Rodríguez <i>et al.</i> , (2015) <sup>105</sup>                                            |
| <i>Phoradendron tomentosum</i>                       | Phoratoxins C                                     |                                   |                        |                                                                                                   |
| <i>Phoradendron tomentosum</i>                       | Phoratoxins E                                     |                                   |                        |                                                                                                   |
| <i>Phoradendron tomentosum</i>                       | Phoratoxins A                                     |                                   |                        |                                                                                                   |
| <i>Phoradendron tomentosum</i>                       | Phoratoxins D                                     | Anticancer, Toxin                 |                        | Johansson <i>et al.</i> , (2003) <sup>142</sup>                                                   |
| <i>Phyllostachys pubescens</i>                       | Pp-AMP2, Pp-AMP1                                  | Antimicrobial, Antifungal         | Antibacterial,         | Fujimura <i>et al.</i> , (2005) <sup>83</sup>                                                     |
| <i>Phytolacca americana</i>                          | Pa-AMP1 (PAFP-S)                                  | Antibacterial, Antifungal         |                        | Liu <i>et al.</i> , (2000) <sup>189</sup> ; Shao <i>et al.</i> , (1999) <sup>318</sup>            |
| <i>Phytolacca dioica</i>                             | Diocin-1                                          | Antimicrobial,                    | Antibacterial,         | Pizzo <i>et al.</i> , (2015) <sup>287</sup>                                                       |
|                                                      | Diocin-2                                          | Immunomodulatory                  |                        |                                                                                                   |
|                                                      | PD-L3-4                                           |                                   |                        |                                                                                                   |
|                                                      | PD-L1-2                                           |                                   |                        |                                                                                                   |
|                                                      | D-S2                                              |                                   |                        |                                                                                                   |
| <i>Picea abies</i>                                   | Putative gamma-thionin                            | Antimicrobial                     |                        | Sharma & Lönneborg, (1996) <sup>319</sup>                                                         |
| <i>Picea sitchensis</i>                              | Piceain 1, Piceain 2                              | Antibacterial, Nematocide         | Antifungal,            | Liu <i>et al.</i> , (2011) <sup>188</sup>                                                         |
| <i>Pinus monticola</i>                               | Thaumatococin-like protein L4,                    | Antimicrobial                     |                        | Liu <i>et al.</i> , (2010) <sup>184</sup>                                                         |

|                                                       |                |                                                                                                                                                                                                                                                                                                                                                                                                                                                          |                                                                        |                                                                                                   |
|-------------------------------------------------------|----------------|----------------------------------------------------------------------------------------------------------------------------------------------------------------------------------------------------------------------------------------------------------------------------------------------------------------------------------------------------------------------------------------------------------------------------------------------------------|------------------------------------------------------------------------|---------------------------------------------------------------------------------------------------|
|                                                       | Thaumatococcus | Thaumatococin A, Thaumatococin B, Thaumatococin C, Thaumatococin D, Thaumatococin E, Thaumatococin F, Thaumatococin G, Thaumatococin H, Thaumatococin I, Thaumatococin J, Thaumatococin K, Thaumatococin L, Thaumatococin M, Thaumatococin N, Thaumatococin O, Thaumatococin P, Thaumatococin Q, Thaumatococin R, Thaumatococin S, Thaumatococin T, Thaumatococin U, Thaumatococin V, Thaumatococin W, Thaumatococin X, Thaumatococin Y, Thaumatococin Z | Antimicrobial, Antifungal, Cytotoxic                                   | (Koval'ova <i>et al.</i> , 2008)                                                                  |
| <i>Pinus sylvestris</i>                               |                | Defensin-2                                                                                                                                                                                                                                                                                                                                                                                                                                               | Antifungal                                                             | (Koval'ova <i>et al.</i> , 2008)                                                                  |
| <i>Pinus sylvestris</i>                               |                | Antimicrobial peptide 4                                                                                                                                                                                                                                                                                                                                                                                                                                  | Antimicrobial                                                          | Asiegbu <i>et al.</i> , (2003) <sup>5</sup>                                                       |
| <i>Pinus sylvestris</i>                               |                | PsDef1                                                                                                                                                                                                                                                                                                                                                                                                                                                   | Antimicrobial, Antifungal                                              | Kovaleva <i>et al.</i> , (2009) <sup>156</sup>                                                    |
| <i>Pinus sylvestris</i>                               |                | p2                                                                                                                                                                                                                                                                                                                                                                                                                                                       | Antifungal, Antibacterial                                              | Kovaleva <i>et al.</i> , (2009) <sup>156</sup>                                                    |
| <i>Pisum sativum</i>                                  |                | Ps-AFP1                                                                                                                                                                                                                                                                                                                                                                                                                                                  | Antifungal                                                             | Mandal <i>et al.</i> , (2013) <sup>196</sup>                                                      |
| <i>Pombalia calceolaria</i>                           |                | Poca B, Poca A                                                                                                                                                                                                                                                                                                                                                                                                                                           | Cytotoxic                                                              | Ciardiello <i>et al.</i> , (2007) <sup>48</sup>                                                   |
| <i>Populus tremula</i>                                |                | Putative Rapid alkalization factor, RALF                                                                                                                                                                                                                                                                                                                                                                                                                 | RALF-Rapid-alkalinization-factor                                       | Pearce <i>et al.</i> , (2001) <sup>277</sup>                                                      |
| <i>Populus trichocarpa</i> , <i>Populus deltoides</i> |                | Rapid alkalization factor 2, RALF2                                                                                                                                                                                                                                                                                                                                                                                                                       | RALF-Rapid-alkalinization-factor                                       | Haruta & Constabel, (2003) <sup>112</sup>                                                         |
| <i>Prosopis cineraria</i>                             |                | Rapid alkalization factor 1, RALF1                                                                                                                                                                                                                                                                                                                                                                                                                       | RALF-Rapid-alkalinization-factor                                       | Haruta & Constabel, (2003) <sup>112</sup>                                                         |
| <i>Prosopis cineraria</i>                             |                | 15 assorted peptides                                                                                                                                                                                                                                                                                                                                                                                                                                     | Antifungal                                                             | Solanki <i>et al.</i> , (2018) <sup>333</sup>                                                     |
| <i>Prunus cerasus</i>                                 |                | na                                                                                                                                                                                                                                                                                                                                                                                                                                                       | Antioxidant, Antihypertensive                                          | García <i>et al.</i> , (2015) <sup>89</sup>                                                       |
| <i>Prunus cerasus</i>                                 |                | na                                                                                                                                                                                                                                                                                                                                                                                                                                                       | ACE-inhibitor                                                          | González-García <i>et al.</i> , (2018) <sup>98</sup>                                              |
| <i>Prunus domestica</i>                               |                | Pathogenesis related protein 5                                                                                                                                                                                                                                                                                                                                                                                                                           | ACE-inhibitor                                                          | El-kereamy <i>et al.</i> , (2011) <sup>69</sup>                                                   |
| <i>Prunus dulcis</i> , <i>Prunus amygdalus</i>        |                | ACE inhibitory peptide                                                                                                                                                                                                                                                                                                                                                                                                                                   | ACE-inhibitor, Antihypertensive                                        | R. L. Liu <i>et al.</i> , (2016) <sup>187</sup>                                                   |
| <i>Psammosilene tunicoides</i>                        |                | Tunicyclin D, Tunicyclin C, Tunicyclin B                                                                                                                                                                                                                                                                                                                                                                                                                 | Antimicrobial, Antifungal                                              | Tian <i>et al.</i> , (2010) <sup>359</sup>                                                        |
| <i>Pseudostellaria heterophylla</i>                   |                | heterophyllin A, heterophyllin B                                                                                                                                                                                                                                                                                                                                                                                                                         | ACE-inhibitor                                                          | Ning-Hua <i>et al.</i> , (1993) <sup>257</sup>                                                    |
| <i>Psidium guajava</i>                                |                | Pg-AMP1, Glycine-rich antimicrobial peptide Pg-AMP                                                                                                                                                                                                                                                                                                                                                                                                       | Antibacterial, Antifungal                                              | Pelegri, Murad, <i>et al.</i> , (2008) <sup>280</sup>                                             |
| <i>Psophocarpus tetragonolobus</i>                    |                | ACE inhibitory peptide                                                                                                                                                                                                                                                                                                                                                                                                                                   | ACE-inhibitor                                                          | Yea <i>et al.</i> , (2014) <sup>425</sup>                                                         |
| <i>Psychotria leptothyrsa</i>                         |                | psyle F                                                                                                                                                                                                                                                                                                                                                                                                                                                  | Cytotoxic                                                              | Gerlach, Burman, <i>et al.</i> , (2010) <sup>92</sup>                                             |
|                                                       |                | psyle D                                                                                                                                                                                                                                                                                                                                                                                                                                                  |                                                                        |                                                                                                   |
|                                                       |                | psyle B                                                                                                                                                                                                                                                                                                                                                                                                                                                  |                                                                        |                                                                                                   |
| <i>Psychotria leptothyrsa</i>                         |                | Psyle C                                                                                                                                                                                                                                                                                                                                                                                                                                                  | Anticancer, Cytotoxic                                                  | Gerlach, Burman, <i>et al.</i> , (2010) <sup>92</sup>                                             |
| <i>Psychotria leptothyrsa</i>                         |                | Antimicrobial Seed Protein/AC34H                                                                                                                                                                                                                                                                                                                                                                                                                         | Antibacterial, Antifungal                                              | Kraszewska <i>et al.</i> , (2016) <sup>160</sup> ; Liu <i>et al.</i> , (2000) <sup>189</sup>      |
| <i>Psychotria leptothyrsa</i>                         |                | Cyclotide psyle F                                                                                                                                                                                                                                                                                                                                                                                                                                        | Cytotoxic                                                              | Gerlach, Burman, <i>et al.</i> , (2010) <sup>92</sup>                                             |
| <i>Psychotria leptothyrsa</i>                         |                | psyle C                                                                                                                                                                                                                                                                                                                                                                                                                                                  | Anticancer, Cytotoxic                                                  | Gerlach, Rathinakumar, <i>et al.</i> , (2010) <sup>93</sup>                                       |
| <i>Psychotria longipes</i>                            |                | Cyclopsychotride-A, CPT                                                                                                                                                                                                                                                                                                                                                                                                                                  | Antibacterial, Antifungal, Hemolytic, Cytotoxic, Neurotensin-inhibitor | Tam <i>et al.</i> , (1999) <sup>347</sup>                                                         |
| <i>Psychotria solitudinum</i>                         |                | Psysol 2                                                                                                                                                                                                                                                                                                                                                                                                                                                 | Enzymatic-degradation, Enzyme-inhibitor                                | Hellinger, Koehbach, Puigpinós, <i>et al.</i> , (2015) <sup>124</sup>                             |
| <i>Pyricularia pubera</i>                             |                | Pp-thionin                                                                                                                                                                                                                                                                                                                                                                                                                                               | Antibacterial, Antifungal                                              | Vernon <i>et al.</i> , (1985) <sup>374</sup> ; Vila-Perelló <i>et al.</i> , (2005) <sup>377</sup> |

|                                                                                                                                           |                                                                                                                                                    |                                                                           |                                                                                                                                                  |
|-------------------------------------------------------------------------------------------------------------------------------------------|----------------------------------------------------------------------------------------------------------------------------------------------------|---------------------------------------------------------------------------|--------------------------------------------------------------------------------------------------------------------------------------------------|
| <i>rachis diogoi</i> , <i>Cicer arietinum</i> ,<br><i>Cajanus cajan</i> , <i>Trigonella<br/>foenum-graecum</i><br><i>Raphanus sativus</i> | Coccinin                                                                                                                                           | Antifungal, Antiproliferative, HIV-1-<br>reverse-transcriptase-inhibition | Ngai & Ng, (2004) <sup>c249</sup>                                                                                                                |
| <i>Raphanus sativus</i>                                                                                                                   | Cysteine-rich antifungal protein 4, Rs-<br>AFP4                                                                                                    | Antifungal                                                                | Terras <i>et al.</i> , (1995) <sup>351</sup>                                                                                                     |
| <i>Raphanus sativus</i>                                                                                                                   | Defensin-like protein 4                                                                                                                            | Antifungal                                                                | Terras <i>et al.</i> , (1995) <sup>351</sup>                                                                                                     |
| <i>Raphanus sativus</i>                                                                                                                   | Defensin-like protein / 2 Rs-AFP2                                                                                                                  | Antibacterial, Antifungal                                                 | Osborn <i>et al.</i> , (1995) <sup>267</sup> ; Terras <i>et al.</i> , (1992) <sup>352</sup> ;<br>(1993) <sup>353</sup>                           |
| <i>Raphanus sativus</i>                                                                                                                   | Rs-AFP1<br>Rs-AFP2                                                                                                                                 | Antifungal                                                                | Terras <i>et al.</i> , (1993) <sup>353</sup>                                                                                                     |
| <i>Raphanus sativus var. niger</i>                                                                                                        | Raphanus Sativus Antifungal Protein 2                                                                                                              | Antifungal                                                                | Terras <i>et al.</i> , (1992) <sup>352</sup>                                                                                                     |
| <i>Raphanus sativus</i> , <i>Brassica<br/>napus</i> , <i>Brassica oleracea var.<br/>gemmifera</i> , <i>Brassica rapa</i>                  | Defensin-like protein 3, Rs-AFP3, Br-<br>AFP2, Bn-AFP1                                                                                             | Antimicrobial, Antifungal                                                 | Terras <i>et al.</i> , (1995) <sup>351</sup>                                                                                                     |
| <i>Raphanus sativus</i> , <i>Sinapis<br/>alba</i> , <i>Brassica juncea</i> ,<br><i>Brassica rapa subsp. pkinensis</i>                     | Defensin-like protein 1 / Rs-AFP1                                                                                                                  | Antibacterial, Antifungal, Hemolytic,<br>Cytotoxic                        | Terras <i>et al.</i> , (1992) <sup>352</sup> ; (1993) <sup>353</sup>                                                                             |
| <i>Rinorea dentata</i>                                                                                                                    | riden A                                                                                                                                            | Uterotonic-activity                                                       | Attah <i>et al.</i> , (2016) <sup>9</sup>                                                                                                        |
| <i>Saccharum officinarum</i>                                                                                                              | Sugarcane defensin 5, Sd5, Sugarcane<br>defensin 3, Sd3, Sugarcane defensin 1,<br>Sd1                                                              | Antibacterial, Antifungal                                                 | De-Paula <i>et al.</i> , (2008) <sup>61</sup>                                                                                                    |
| <i>Saccharum spp.</i>                                                                                                                     | Rapid alkalization factor sac-RALF1                                                                                                                | RALF-Rapid-alkalinization-factor                                          | Mingossi <i>et al.</i> , (2010) <sup>215</sup>                                                                                                   |
| <i>Sambucus nigra</i>                                                                                                                     | Hevein-like peptide SH-HLPf                                                                                                                        | Antimicrobial, Antifungal                                                 | Van Damme <i>et al.</i> , (1999) <sup>368</sup>                                                                                                  |
| <i>Santalum album</i>                                                                                                                     | Cyclosaplin                                                                                                                                        | Anticancer, Hemolytic, Cytotoxic                                          | Mishra <i>et al.</i> , (2014) <sup>216</sup>                                                                                                     |
| <i>Secale cereale</i>                                                                                                                     | Basic endochitinase C                                                                                                                              | Antifungal                                                                | Taira <i>et al.</i> , (2002) <sup>345</sup>                                                                                                      |
| <i>Secale cereale</i> , <i>Triticum<br/>aestivum</i>                                                                                      | ACE inhibitory peptide                                                                                                                             | ACE-inhibitor, Antihypertensive                                           | Hu <i>et al.</i> , (2011) <sup>129</sup>                                                                                                         |
| <i>Sechium edule</i>                                                                                                                      | Trypsin inhibitor 5<br>Trypsin inhibitor 2b<br>Trypsin inhibitor 2a                                                                                | Enzyme-inhibitor                                                          | Laure <i>et al.</i> , (2006) <sup>165</sup>                                                                                                      |
| <i>Sesamum indicum</i>                                                                                                                    | Antimicrobial protein 2 (Si-AMP2)<br>(Fragments)                                                                                                   | Antibacterial                                                             | Maria-Neto <i>et al.</i> , (2011) <sup>199</sup>                                                                                                 |
| <i>Sesamum indicum</i>                                                                                                                    | Angiotensin I-converting enzyme inhibitor<br>6<br>Angiotensin I-converting enzyme inhibitor<br>3, SPP<br>Angiotensin I-converting enzyme inhibitor | Enzyme-inhibitor, Antihypertensive                                        | García <i>et al.</i> , (2013) <sup>90</sup> ; Puchalska <i>et al.</i> , (2015) <sup>298</sup> ;<br>Umekawa <i>et al.</i> , (2010) <sup>366</sup> |

|                                                                                                               |                                                                                                                           |                                                  |  |                                                                                                                                                                                                                                                                                                                                                              |
|---------------------------------------------------------------------------------------------------------------|---------------------------------------------------------------------------------------------------------------------------|--------------------------------------------------|--|--------------------------------------------------------------------------------------------------------------------------------------------------------------------------------------------------------------------------------------------------------------------------------------------------------------------------------------------------------------|
|                                                                                                               | 1, SPP                                                                                                                    |                                                  |  |                                                                                                                                                                                                                                                                                                                                                              |
|                                                                                                               | Angiotensin I-converting enzyme inhibitor                                                                                 |                                                  |  |                                                                                                                                                                                                                                                                                                                                                              |
|                                                                                                               | 7                                                                                                                         |                                                  |  |                                                                                                                                                                                                                                                                                                                                                              |
| <i>Sesamum indicum</i>                                                                                        | SPP, Angiotensin I-converting enzyme inhibitor 5                                                                          | Antihypertensive, Enzyme-inhibitor, Neuropeptide |  | García <i>et al.</i> , (2013) <sup>90</sup> ; Puchalska <i>et al.</i> , (2015) <sup>298</sup> ; Umekawa <i>et al.</i> , (2010) <sup>366</sup>                                                                                                                                                                                                                |
| <i>Sesamum indicum</i> ,<br><i>Amaranthus hypochondriacus</i> ,<br><i>Triticum aestivum</i> , <i>Zea mays</i> | SPP, Angiotensin I-converting enzyme inhibitor 4, ACE inhibitory peptide                                                  | Antihypertensive, Enzyme-inhibitor, Neuropeptide |  | García <i>et al.</i> , (2013) <sup>90</sup> ; Hu <i>et al.</i> , (2011) <sup>129</sup> ; Miyoshi <i>et al.</i> , (1991) <sup>217</sup> ; Nogata <i>et al.</i> , (2009) <sup>259</sup> ; Puchalska <i>et al.</i> , (2013) <sup>297</sup> ; (2015) <sup>298</sup> ; Umekawa <i>et al.</i> , (2010) <sup>366</sup> ; Yano <i>et al.</i> , (1996) <sup>423</sup> |
| <i>Sinapis alba</i>                                                                                           | Cysteine-rich antifungal protein 2B                                                                                       | Antifungal                                       |  | Neumann <i>et al.</i> , (1996) <sup>245</sup>                                                                                                                                                                                                                                                                                                                |
| <i>Sinapis alba</i>                                                                                           | Defensin-like protein 2A/Sa-AFP2                                                                                          | Antibacterial, Antifungal                        |  | Terras <i>et al.</i> , (1993) <sup>353</sup>                                                                                                                                                                                                                                                                                                                 |
| <i>Sinapis alba</i> , <i>Brassica hirta</i>                                                                   | Cysteine-rich antifungal protein 2 (Sa-AFP2)                                                                              | Antifungal                                       |  | Neumann <i>et al.</i> , (1996) <sup>245</sup> ; Terras <i>et al.</i> , (1993) <sup>353</sup>                                                                                                                                                                                                                                                                 |
| <i>Solanum chacoense</i>                                                                                      | Putative Rapid alkalization factor 4, RALF1                                                                               | RALF-Rapid-alkalinization-factor                 |  | Germain <i>et al.</i> , (2005) <sup>94</sup>                                                                                                                                                                                                                                                                                                                 |
|                                                                                                               | Putative Rapid alkalization factor 5, RALF1                                                                               |                                                  |  |                                                                                                                                                                                                                                                                                                                                                              |
| <i>Solanum chacoense</i>                                                                                      | Putative Rapid alkalization factor 1, RALF1                                                                               | RALF-Rapid-alkalinization-factor                 |  | Germain <i>et al.</i> , (2005) <sup>94</sup>                                                                                                                                                                                                                                                                                                                 |
|                                                                                                               | Putative Rapid alkalization factor 3, RALF1                                                                               |                                                  |  |                                                                                                                                                                                                                                                                                                                                                              |
| <i>Solanum commersonii</i>                                                                                    | Osmotin-like protein OSML13                                                                                               | Antimicrobial                                    |  | Zhu <i>et al.</i> , (1995) <sup>440</sup>                                                                                                                                                                                                                                                                                                                    |
| <i>Solanum commersonii</i>                                                                                    | Osmotin-like protein OSML81                                                                                               | Antimicrobial                                    |  | Zhu <i>et al.</i> , (1995) <sup>439</sup> ; Zhu <i>et al.</i> , (1995) <sup>440</sup>                                                                                                                                                                                                                                                                        |
| <i>Solanum lycopersicum</i> ,<br><i>Lycopersicon esculentum</i>                                               | Glycine-rich                                                                                                              | Antimicrobial                                    |  | Showalter <i>et al.</i> , (1991) <sup>323</sup>                                                                                                                                                                                                                                                                                                              |
| <i>Solanum nigrum</i>                                                                                         | Osmotin-like protein                                                                                                      | Antifungal                                       |  | Jami <i>et al.</i> , (2007) <sup>138</sup>                                                                                                                                                                                                                                                                                                                   |
| <i>Sorghum bicolor</i>                                                                                        | SIalpha1, SIalpha2                                                                                                        | Antimicrobial, Antifungal                        |  | Bloch <i>et al.</i> , (1998) <sup>20</sup>                                                                                                                                                                                                                                                                                                                   |
| <i>Sorghum bicolor</i>                                                                                        | Defensin-like protein 1 / SI alpha-1                                                                                      | Antifungal, Enzyme-inhibitor                     |  | Nitti <i>et al.</i> , (1995) <sup>258</sup> ; Osborn <i>et al.</i> , (1995) <sup>267</sup>                                                                                                                                                                                                                                                                   |
| <i>Sorghum bicolor</i>                                                                                        | F2-C, F2-E                                                                                                                | Antioxidant                                      |  | Agrawal <i>et al.</i> , (2017) <sup>2</sup>                                                                                                                                                                                                                                                                                                                  |
| <i>Sorghum vulgare</i> , <i>Sorghum bicolor</i>                                                               | Inhibitor of insect alpha-amylase SIa-2, Inhibitor of insect alpha-amylase SIa-1, Inhibitor of insect alpha-amylase SIa-3 | Enzyme-inhibitor                                 |  | Jr & Richardson, (1991) <sup>143</sup>                                                                                                                                                                                                                                                                                                                       |
| <i>Sorghum vulgare</i> , <i>Sorghum bicolor</i>                                                               | alpha-Amylase inhibitor, SI alpha-2.1                                                                                     | Enzyme-inhibitor                                 |  | Nitti <i>et al.</i> , (1995) <sup>258</sup>                                                                                                                                                                                                                                                                                                                  |
| <i>Sorghum vulgare</i> , <i>Sorghum bicolor</i>                                                               | Putative Rapid alkalization factor, RALF                                                                                  | RALF-Rapid-alkalinization-factor                 |  | Pearce <i>et al.</i> , (2001) <sup>277</sup>                                                                                                                                                                                                                                                                                                                 |
| <i>Spinacia oleracea</i>                                                                                      | So-D6, Defensin D5, Defensin D1,                                                                                          | Antibacterial, Antifungal                        |  | Segura <i>et al.</i> , (1998) <sup>316</sup>                                                                                                                                                                                                                                                                                                                 |

|                                             |                                                                                                                                                  |                                       |                                                                  |
|---------------------------------------------|--------------------------------------------------------------------------------------------------------------------------------------------------|---------------------------------------|------------------------------------------------------------------|
| <i>Spinacia oleracea</i>                    | Defensin D6, Defensin D2, So-D2, Defensin D7, So-D7, So-D5<br>Trypsin inhibitor, SOTI II, Trypsin inhibitor, SOTI III, Trypsin inhibitor, SOTI I | Enzyme-inhibitor                      | Kowalska <i>et al.</i> , (2007) <sup>157</sup>                   |
| <i>Spinacia oleracea</i> cv. <i>Matador</i> | So-D1-7                                                                                                                                          | Antibacterial, Antifungal             | Segura <i>et al.</i> , (1998) <sup>316</sup>                     |
| <i>Steinchisma laxum</i>                    | Panitide L1, Panitide L6, Panitide L4, Panitide L2                                                                                               | Antimicrobial                         | Nguyen <i>et al.</i> , (2013) <sup>250</sup>                     |
| <i>Steinchisma laxum</i>                    | Linear Cyclotide Panitide L3, Linear Cyclotide Panitide L4, Linear Cyclotide Panitide L7, Linear Cyclotide Panitide L8                           | Antibacterial, Anticancer, Antifungal | Nguyen <i>et al.</i> , (2013) <sup>250</sup>                     |
| <i>Steinchisma laxum</i>                    | Linear Cyclotide Panitide L2, Linear Cyclotide Panitide L1                                                                                       | Antibacterial, Antifungal             | Nguyen <i>et al.</i> , (2013) <sup>250</sup>                     |
| <i>Stellaria dichotoma</i>                  | dichotomin A, dichotomin B, dichotomin C, dichotomin D, dichotomin E                                                                             | Cytotoxic, Cyclooxygenase-inhibitor   | Morita <i>et al.</i> , (1996) <sup>227</sup>                     |
| <i>Stellaria dichotoma</i>                  | dichotomin H                                                                                                                                     | Cytotoxic, Cyclooxygenase-inhibitor   | Morita, Takeya, & Itokawa, (1997) <sup>231</sup>                 |
| <i>Stellaria dichotoma</i>                  | dichotomin I                                                                                                                                     | Cytotoxic, Cyclooxygenase-inhibitor   | Morita, Takeya, & Itokawa, (1997) <sup>231</sup>                 |
| <i>Stellaria dichotoma lanceolata</i>       | var. Dichotomin J                                                                                                                                | Neuropeptide                          | Morita <i>et al.</i> , (2005) <sup>224</sup>                     |
| <i>Stellaria media</i>                      | Dichotomin K                                                                                                                                     |                                       |                                                                  |
| <i>Stellaria media</i>                      | Antimicrobial peptide X precursor (Sm-AMP-X), Sm AMP3, Sm AMP-1.1a, Sm-AMP-X1, Sm-AMP-X2                                                         | Antifungal                            | Slavokhotova, Rogozhin, <i>et al.</i> , (2014) <sup>331</sup>    |
| <i>Stellaria media</i>                      | Sm-AMP-D1, Defensin Sm-AMP-D2                                                                                                                    | Antimicrobial, Antifungal             | Slavokhotova <i>et al.</i> , (2011) <sup>330</sup>               |
| <i>Stellaria yunnanensis</i>                | yunnanin A                                                                                                                                       | Antiproliferative                     | Morita, Kayashita, Takeya, <i>et al.</i> , (1997) <sup>229</sup> |
| <i>Stellaria yunnanensis</i>                | pseudostellarin G                                                                                                                                | Tyrosinase-inhibitor                  | Morita, Kayashita, <i>et al.</i> , (1995) <sup>228</sup>         |
| <i>Stellaria yunnanensis</i>                | yunnanin C                                                                                                                                       | Antiproliferative                     | Napolitano <i>et al.</i> , (2003) <sup>243</sup>                 |
| <i>Stellaria yunnanensis</i>                | pseudostellarin D                                                                                                                                | Tyrosinase-inhibitor                  | Morita, Kayashita, <i>et al.</i> , (1995) <sup>228</sup>         |
| <i>Stellaria yunnanensis</i>                | pseudostellarin B                                                                                                                                | Tyrosinase-and-melanin-inhibitor      | Morita <i>et al.</i> , (1994) <sup>226</sup>                     |
| <i>Stellaria yunnanensis</i>                | pseudostellarin E                                                                                                                                | Tyrosinase-inhibitor                  | Morita, Kayashita, <i>et al.</i> , (1995) <sup>228</sup>         |
| <i>Stellaria yunnanensis</i>                | pseudostellarin F                                                                                                                                | Tyrosinase-inhibitor                  | Morita, Kayashita, <i>et al.</i> , (1995) <sup>228</sup>         |
| <i>Stellaria yunnanensis</i>                | pseudostellarin C                                                                                                                                | Tyrosinase-and-melanin-inhibitor      | Morita <i>et al.</i> , (1994) <sup>226</sup>                     |
| <i>Stellaria yunnanensis</i>                | pseudostellarin H                                                                                                                                | Tyrosinase-inhibitor                  | Morita, Kayashita, <i>et al.</i> , (1995) <sup>228</sup>         |
| <i>Taraxacum officinale</i>                 | 2S albumin                                                                                                                                       | Antimicrobial                         | Odintsova <i>et al.</i> , (2010) <sup>264</sup>                  |
| <i>Taraxacum officinale</i>                 | ToAMP4                                                                                                                                           | Antibacterial, Antifungal             | Astafieva <i>et al.</i> , (2013) <sup>6</sup>                    |

|                                                                                                                                                                                                                                                             |                                                                                                                                          |                                                   |                                                                                                                                                                                                                                                                               |
|-------------------------------------------------------------------------------------------------------------------------------------------------------------------------------------------------------------------------------------------------------------|------------------------------------------------------------------------------------------------------------------------------------------|---------------------------------------------------|-------------------------------------------------------------------------------------------------------------------------------------------------------------------------------------------------------------------------------------------------------------------------------|
| <i>Taraxacum officinale</i>                                                                                                                                                                                                                                 | ToAMP3, ToAMP1, Antimicrobial peptide 2, ToAMP2                                                                                          | Antibacterial, Antifungal                         | Astafieva <i>et al.</i> , (2012) <sup>7</sup>                                                                                                                                                                                                                                 |
| <i>Tephrosia villosa</i>                                                                                                                                                                                                                                    | TvD1 defensin                                                                                                                            | Antifungal                                        | Vijayan <i>et al.</i> , (2008) <sup>376</sup>                                                                                                                                                                                                                                 |
| <i>Terminalia chebula</i>                                                                                                                                                                                                                                   | Chebulin                                                                                                                                 | Antihypertensive, ACE-inhibitor                   | Daskaya-Dikmen <i>et al.</i> , (2017) <sup>60</sup>                                                                                                                                                                                                                           |
| <i>Trapa natans</i>                                                                                                                                                                                                                                         | Antifungal peptide 1, Tn-AFP 1                                                                                                           | Antifungal, Antimicrobial                         | Mandal <i>et al.</i> , (2011) <sup>195</sup>                                                                                                                                                                                                                                  |
| <i>Treculia obovoidea</i>                                                                                                                                                                                                                                   | Anti-HIV peptide, Treculavirin                                                                                                           | Antiviral                                         | Bokesch <i>et al.</i> , (2004) <sup>23</sup>                                                                                                                                                                                                                                  |
| <i>Trichosanthes kirilowii</i>                                                                                                                                                                                                                              | Trypsin inhibitor TTI-I<br>Trypsin inhibitor TTI-II                                                                                      | Enzyme-inhibitor                                  | (Qian YW <i>et al.</i> , 1990)                                                                                                                                                                                                                                                |
| <i>Trichosanthes kirilowii</i>                                                                                                                                                                                                                              | Trypsin inhibitor                                                                                                                        | Enzyme-inhibitor                                  | Tan <i>et al.</i> , (1984) <sup>348</sup>                                                                                                                                                                                                                                     |
| <i>Triticum aestivum</i>                                                                                                                                                                                                                                    | Thaumatin-like protein PWIR2                                                                                                             | Antimicrobial                                     | Rebmann <i>et al.</i> , (1991) <sup>301</sup>                                                                                                                                                                                                                                 |
| <i>Triticum aestivum</i> cv. <i>Maniton</i>                                                                                                                                                                                                                 | Purothionin alpha2                                                                                                                       | Toxin, Antifungal                                 | Castagnaro <i>et al.</i> , (1994) <sup>33</sup>                                                                                                                                                                                                                               |
| <i>Triticum aestivum</i> , <i>Aegilops tauschii</i>                                                                                                                                                                                                         | Thionin type V                                                                                                                           | Toxin                                             | Castagnaro <i>et al.</i> , (1992) <sup>32</sup>                                                                                                                                                                                                                               |
| <i>Triticum aestivum</i> , <i>Aegilops tauschii</i> x <i>Triticum turgidum</i> , <i>Secale cereale</i> , <i>Aegilops tauschii</i> , <i>Aegilops tauschii</i> var. <i>meyeri</i> , <i>Aegilops ventricosa</i> , <i>Avena hirtula</i> , <i>Avena strigosa</i> | Puroindoline-A, PINA                                                                                                                     | Antibacterial                                     | Capparelli <i>et al.</i> , (2005) <sup>31</sup>                                                                                                                                                                                                                               |
| <i>Triticum aestivum</i> , <i>Olea europaea</i>                                                                                                                                                                                                             | Angiotensin I-converting enzyme inhibitor 16                                                                                             | Enzyme-inhibitor, Antioxidant                     | Esteve <i>et al.</i> , (2015) <sup>72</sup> ; Matsui <i>et al.</i> , (1999) <sup>203</sup>                                                                                                                                                                                    |
| <i>Triticum aestivum</i> , <i>Secale cereale</i> , <i>Hordeum vulgare</i>                                                                                                                                                                                   | Gliadin                                                                                                                                  | Immunomodulatory                                  | Lammers <i>et al.</i> , (2011) <sup>164</sup>                                                                                                                                                                                                                                 |
| <i>Triticum aestivum</i> , <i>Sesamum indicum</i>                                                                                                                                                                                                           | Angiotensin I-converting enzyme inhibitor 7, SPP- ACE inhibitory peptide                                                                 | Enzyme-inhibitor, Antihypertensive, ACE-inhibitor | García <i>et al.</i> , (2013) <sup>90</sup> ; Lee & Hur, (2017) <sup>b171</sup> ; Matsui <i>et al.</i> , (1999) <sup>203</sup> ; Puchalska <i>et al.</i> , (2015) <sup>298</sup> ; Ueno <i>et al.</i> , (2005) <sup>365</sup> ; Umekawa <i>et al.</i> , (2010) <sup>366</sup> |
| <i>Triticum dicoccum</i>                                                                                                                                                                                                                                    | Four peptides (VLPPQQQY, TVTSLDLPVLRW, VTSLDLPVLRW, FVPY)                                                                                | Antioxidant                                       | Babini <i>et al.</i> , (2017) <sup>13</sup>                                                                                                                                                                                                                                   |
| <i>Triticum durum</i>                                                                                                                                                                                                                                       | Immunoregulator                                                                                                                          | Immunoregulator                                   | Silano <i>et al.</i> , (2007) <sup>324</sup>                                                                                                                                                                                                                                  |
| <i>Triticum kiharae</i>                                                                                                                                                                                                                                     | Chain A, Hevein-Type Antifungal Peptide With A Unique 10-Cysteine Motif                                                                  | Antibacterial, Antifungal                         | Odintsova <i>et al.</i> , (2009) <sup>263</sup>                                                                                                                                                                                                                               |
| <i>Triticum kiharae</i>                                                                                                                                                                                                                                     | Defensin Tk-AMP-D1.1, Defensin Tk-AMP-D3, Defensin Tk-AMP-D4, Defensin Tk-AMP-D5, Defensin Tk-AMP-D6.1, Defensin Tk-AMP-D2, Defensin Tk- | Antimicrobial, Antifungal                         | Odintsova <i>et al.</i> , (2007) <sup>261</sup>                                                                                                                                                                                                                               |

|                                                                                                                              |                                                                                                       |                                                                                 |                                                                                                                                                                    |
|------------------------------------------------------------------------------------------------------------------------------|-------------------------------------------------------------------------------------------------------|---------------------------------------------------------------------------------|--------------------------------------------------------------------------------------------------------------------------------------------------------------------|
| <i>Triticum kiharae</i> , <i>Triticum aestivum</i> , <i>Aegilops tauschii</i>                                                | AMP-D1<br>Antimicrobial peptide 1a, WAMP-1a                                                           | Antibacterial, Antifungal                                                       | Odintsova <i>et al.</i> , (2009) <sup>263</sup>                                                                                                                    |
| <i>Triticum kiharae</i> , <i>Triticum aestivum</i> , <i>Aegilops tauschii</i> , <i>Triticum timopheevii</i>                  | Tk-AMP-X1                                                                                             | Antifungal                                                                      | Utkina <i>et al.</i> , (2013) <sup>367</sup>                                                                                                                       |
| <i>Triticum kiharae</i> , <i>Triticum aestivum</i> , <i>Triticum urartu</i> , <i>Triticum monococcum subsp. aegilopoides</i> | Tk-AMP-X2                                                                                             | Antifungal                                                                      | Utkina <i>et al.</i> , (2013) <sup>367</sup>                                                                                                                       |
| <i>Triticum kiharae</i> , <i>Triticum urartu</i>                                                                             | TK-AMP-D1.1/R46C                                                                                      | Antibacterial                                                                   | Kraszewska <i>et al.</i> , (2016) <sup>160</sup>                                                                                                                   |
| <i>Triticum turgidum</i>                                                                                                     | gamma2-purothionin                                                                                    | Antimicrobial                                                                   | Colilla <i>et al.</i> , (1990) <sup>51</sup>                                                                                                                       |
| <i>Tulipa gesneriana</i>                                                                                                     | Tu-AMP2 alpha chain, Tu-AMP2 beta chain, Tu-AMP1, Tu-AMP2                                             | Antibacterial, Antifungal                                                       | Fujimura <i>et al.</i> , (2004) <sup>82</sup>                                                                                                                      |
| <i>Undaria pinnatifida</i>                                                                                                   | ACE inhibitor from wakame                                                                             | Antihypertensive                                                                | Ketnawa & Rawdkuen, (2013) <sup>147</sup>                                                                                                                          |
| <i>Undaria pinnatifida</i>                                                                                                   | Angiotensin I-converting enzyme inhibitor WH                                                          | Enzyme-inhibitor, Vasorelaxant                                                  | Suetsuna <i>et al.</i> , (2004) <sup>342</sup>                                                                                                                     |
| <i>Vaccaria hispanica</i>                                                                                                    | segetalin J<br>segetalin L<br>segetalin D<br>segetalin A<br>segetalin G<br>segetalin B<br>segetalin K | Estrogen-like-activity                                                          | Condie <i>et al.</i> , (2011) <sup>52</sup>                                                                                                                        |
| <i>Vaccaria hispanica</i>                                                                                                    | segetalin F                                                                                           | Vasorelaxant                                                                    | Morita, Eda, <i>et al.</i> , (2006) <sup>221</sup>                                                                                                                 |
| <i>Vaccaria hispanica</i>                                                                                                    | segetalin C                                                                                           | Cytotoxic                                                                       | Morita, Yun, <i>et al.</i> , (1995) <sup>232</sup>                                                                                                                 |
| <i>Vaccaria hispanica</i>                                                                                                    | segetalin E                                                                                           | Cytotoxic                                                                       | Morita, Yun, <i>et al.</i> , (1995) <sup>232</sup>                                                                                                                 |
| <i>Vaccaria segetalis</i>                                                                                                    | Segetalin G                                                                                           | Hormone                                                                         | Yun <i>et al.</i> , (1997) <sup>433</sup>                                                                                                                          |
| <i>Veronica hederifolia</i>                                                                                                  | Trypsin inhibitor VhTI                                                                                | Enzyme-inhibitor                                                                | Connors <i>et al.</i> , (2007) <sup>53</sup>                                                                                                                       |
| <i>Vicia faba</i>                                                                                                            | Fabatin-2<br>Fabatin-1                                                                                | Antibacterial                                                                   | Kraszewska <i>et al.</i> , (2016) <sup>160</sup> ; Y. Zhang & Lewis, (1997) <sup>437</sup>                                                                         |
| <i>Vigna angularis</i>                                                                                                       | Va defensin 1 VaD1                                                                                    | Antibacterial, Antifungal                                                       | Chen <i>et al.</i> , (2005) <sup>42</sup>                                                                                                                          |
| <i>Vigna radiata var. radiata</i>                                                                                            | Nonspecific lipid-transfer protein 1                                                                  | Antibacterial, Antifungal                                                       | Wang <i>et al.</i> , (2004) <sup>390</sup>                                                                                                                         |
| <i>Vigna radiata</i> , <i>Vigna nakashimae</i>                                                                               | Plant defensin VrD1                                                                                   | Antimicrobial, Antibacterial, Antifungal, Insecticidal, Alpha-amylase-inhibitor | Chen <i>et al.</i> , (2005) <sup>42</sup> ; Chen <i>et al.</i> , (2004) <sup>43</sup> ; Chen <i>et al.</i> , (2002) <sup>44</sup> ; Sanchez, (2013) <sup>313</sup> |

|                                                                      |                                                          |                                                                            |                                                                                                                                                                                |
|----------------------------------------------------------------------|----------------------------------------------------------|----------------------------------------------------------------------------|--------------------------------------------------------------------------------------------------------------------------------------------------------------------------------|
| <i>Vigna unguiculata</i>                                             | Cp-thionin-2, Defensin-like protein 2                    | Antibacterial                                                              | Franco <i>et al.</i> , (2006) <sup>79</sup> ; Kraszewska <i>et al.</i> , (2016) <sup>160</sup>                                                                                 |
| <i>Vigna unguiculata</i>                                             | VuD1                                                     | Antimicrobial, Enzyme-inhibitor                                            | Pelegriani, Lay, <i>et al.</i> , (2008) <sup>279</sup>                                                                                                                         |
| <i>Vigna unguiculata</i>                                             | Thionin, Cp-Thionin                                      | Enzyme-inhibitor                                                           | Melo <i>et al.</i> , (2002) <sup>211</sup>                                                                                                                                     |
| <i>Vigna unguiculata</i>                                             | Coccinin                                                 | Antifungal, Antiproliferative, HIV-1-reverse-transcriptase-inhibition      | Ngai & Ng, (2004) <sup>c249</sup>                                                                                                                                              |
| <i>Vigna unguiculata</i>                                             | pSAS10                                                   | Antifungal, Antimicrobial, Development-regulator                           | Ishibashi <i>et al.</i> , (1990) <sup>135</sup>                                                                                                                                |
| <i>Vigna unguiculata</i> subsp. <i>sesquipedalis</i>                 | Sesquin                                                  | Antibacterial, Antifungal, Antiviral, Anti-HIV, Anticancer                 | Jack & Tzi, (2005) <sup>137</sup>                                                                                                                                              |
| <i>Vincetoxicum mongolicum</i>                                       | Thaumatococin-like protein                               | Antimicrobial                                                              | Wang <i>et al.</i> , (2012) <sup>389</sup>                                                                                                                                     |
| <i>Viola abyssinica</i>                                              | vaby B                                                   | Cytotoxic                                                                  | Yeshak <i>et al.</i> , (2011) <sup>426</sup>                                                                                                                                   |
| <i>Viola abyssinica</i>                                              | Vaby A                                                   | Anticancer, Antimicrobial, Cytotoxic                                       | Pränting <i>et al.</i> , (2010) <sup>296</sup> ; Yeshak <i>et al.</i> , (2011) <sup>426</sup>                                                                                  |
| <i>Viola abyssinica</i>                                              | Vaby D                                                   | Antibacterial, Antifungal, Cytotoxic                                       | Prabhu <i>et al.</i> , (2013) <sup>295</sup> ; Pränting <i>et al.</i> , (2010) <sup>296</sup> ; Yeshak <i>et al.</i> , (2011) <sup>426</sup>                                   |
| <i>Viola arvensis</i> , <i>Viola biflora</i> , <i>Viola tricolor</i> | Vitri peptide A                                          | Anticancer, Antimicrobial, Cytotoxic                                       | Herrmann <i>et al.</i> , (2008) <sup>127</sup> ; Svängård <i>et al.</i> , (2004) <sup>343</sup> ; Tang <i>et al.</i> , (2010) <sup>349</sup>                                   |
| <i>Viola arvensis</i> , <i>Viola tricolor</i>                        | Varv peptide B<br>Varv peptide C<br>Varv peptide G       | Antimicrobial, Enzymatic-degradation                                       | Göransson <i>et al.</i> , (1999) <sup>99</sup> ; Hellinger, Koebach, Soltis, <i>et al.</i> , (2015) <sup>125</sup>                                                             |
| <i>Viola arvensis</i> , <i>Viola tricolor</i>                        | Varv He, Varv peptide H                                  | Anticancer                                                                 | Tang <i>et al.</i> , (2010) <sup>349</sup>                                                                                                                                     |
| <i>Viola arvensis</i> , <i>Viola tricolor</i>                        | Tricyclon-A                                              | Antibacterial, Anticancer, Antifungal, Antiviral, Hemolytic, Antimicrobial | Hellinger, Koebach, Soltis, <i>et al.</i> , (2015) <sup>125</sup> ; Mulvenna, Sando, <i>et al.</i> , (2005) <sup>235</sup> ; Strömstedt <i>et al.</i> , (2017) <sup>a338</sup> |
| <i>Viola arvensis</i> , <i>Viola tricolor</i>                        | Varv peptide D<br>Varv peptide H                         | Anticancer, Antimicrobial, Enzymatic-degradation                           | Göransson <i>et al.</i> , (1999) <sup>99</sup> ; Hellinger, Koebach, Soltis, <i>et al.</i> , (2015) <sup>125</sup> ; Tang <i>et al.</i> , (2010) <sup>349</sup>                |
| <i>Viola biflora</i>                                                 | vibi I<br>vibi K<br>vibi A<br>vibi J<br>vibi F<br>vibi E | Cytotoxic, Antimicrobial                                                   | Herrmann <i>et al.</i> , (2008) <sup>127</sup>                                                                                                                                 |
| <i>Viola biflora</i> , <i>Gloeospermum pauciflorum</i>               | vibi E                                                   | Anticancer, Antimicrobial                                                  | Herrmann <i>et al.</i> , (2008) <sup>127</sup>                                                                                                                                 |
| <i>Viola biflora</i> , <i>Palicourea tetragona</i>                   | vibi B                                                   | Cytotoxic, Antimicrobial                                                   | Herrmann <i>et al.</i> , (2008) <sup>127</sup>                                                                                                                                 |
| <i>Viola biflora</i> , <i>Psychotria leptothyrsa</i>                 | Vibi H                                                   | Anticancer, Antimicrobial                                                  | Herrmann <i>et al.</i> , (2008) <sup>127</sup>                                                                                                                                 |
| <i>Viola hederacea</i>                                               | Leaf cyclotide, Vhl-1                                    | Antibacterial, Antiviral, Antifungal                                       | Chen <i>et al.</i> , (2005) <sup>40</sup>                                                                                                                                      |

|                                                                            |                   |                                                                                                                                            |                                                                                                                                                                                                                                                                                                                                       |
|----------------------------------------------------------------------------|-------------------|--------------------------------------------------------------------------------------------------------------------------------------------|---------------------------------------------------------------------------------------------------------------------------------------------------------------------------------------------------------------------------------------------------------------------------------------------------------------------------------------|
| <i>Viola hederacea</i>                                                     | cycloviolacin H4  | Hemolytic, Antimicrobial                                                                                                                   | Chen <i>et al.</i> , (2006) <sup>41</sup>                                                                                                                                                                                                                                                                                             |
| <i>Viola hederacea</i>                                                     | Vhl-1             | Antiviral, Antimicrobial                                                                                                                   | Chen <i>et al.</i> , (2005) <sup>40</sup>                                                                                                                                                                                                                                                                                             |
| <i>Viola hederacea</i>                                                     | Vhl-2             | Antiviral, Anti-HIV, Anticancer                                                                                                            | Chen <i>et al.</i> , (2005) <sup>40</sup>                                                                                                                                                                                                                                                                                             |
| <i>Viola hederacea</i>                                                     | Cycloviolacin H3  | Antimicrobial, Nematocide, Antiviral                                                                                                       | Chen <i>et al.</i> , (2005) <sup>40</sup> ; Colgrave, Kotze, Ireland, <i>et al.</i> , (2008) <sup>50</sup> ; M. R. Plan <i>et al.</i> , (2010) <sup>290</sup>                                                                                                                                                                         |
| <i>Viola hederacea</i>                                                     | Cycloviolacin H2  | Antimicrobial, Anti-HIV, Antiviral                                                                                                         | Chen <i>et al.</i> , (2005) <sup>40</sup>                                                                                                                                                                                                                                                                                             |
| <i>Viola hederacea</i> , <i>Oldenlandia affinis</i>                        | Kalata B7         | Antibacterial, Anticancer, Antifungal, Nematocide, Molluscicidal, Metal-binding, Membrane-Binding, Antiparasitic, Hemolytic, Antimicrobial | Colgrave, Kotze, Huang, <i>et al.</i> , (2008) <sup>49</sup> ; Jennings <i>et al.</i> , (2001) <sup>140</sup> ; Plan <i>et al.</i> , (2010) <sup>290</sup> ; Plan <i>et al.</i> , (2007) <sup>288</sup> ; (2008) <sup>289</sup> ; Shenkarev <i>et al.</i> , (2008) <sup>322</sup> ; Strömstedt <i>et al.</i> , (2017) <sup>b339</sup> |
| <i>Viola hederacea</i> , <i>Oldenlandia affinis</i>                        | Kalata B6         | Nematocide, Molluscicidal, Membrane-Binding, Antimicrobial, Hemolytic                                                                      | Dutton <i>et al.</i> , (2004) <sup>68</sup> ; Jennings <i>et al.</i> , (2001) <sup>140</sup> ; Plan <i>et al.</i> , (2010) <sup>290</sup> ; Plan <i>et al.</i> , (2007) <sup>288</sup>                                                                                                                                                |
| <i>Viola hederacea</i> , <i>Oldenlandia affinis</i>                        | Kalata-B4         | Antimicrobial, Insecticidal                                                                                                                | Craik <i>et al.</i> , (1999) <sup>56</sup> ; Plan <i>et al.</i> , (2007) <sup>288</sup> ; Trabi & Craik, (2004) <sup>361</sup>                                                                                                                                                                                                        |
| <i>Viola hederacea</i> , <i>Viola tricolor</i>                             | Cycloviolacin-H1  | Antimicrobial                                                                                                                              | Craik <i>et al.</i> , (1999) <sup>56</sup>                                                                                                                                                                                                                                                                                            |
| <i>Viola odorata</i>                                                       | Cycloviolacin-O6  | Antimicrobial                                                                                                                              | Craik <i>et al.</i> , (1999) <sup>56</sup> ; Ireland, Colgrave, & Craik, (2006) <sup>133</sup>                                                                                                                                                                                                                                        |
| <i>Viola odorata</i>                                                       | Cycloviolacin O10 | Antimicrobial, Insecticidal, Enzymatic-digestion                                                                                           | Ireland, Colgrave, & Craik, (2006) <sup>133</sup>                                                                                                                                                                                                                                                                                     |
| <i>Viola odorata</i>                                                       | Cycloviolacin O18 |                                                                                                                                            |                                                                                                                                                                                                                                                                                                                                       |
| <i>Viola odorata</i>                                                       | Cycloviolacin O20 |                                                                                                                                            |                                                                                                                                                                                                                                                                                                                                       |
| <i>Viola odorata</i>                                                       | Cycloviolacin O17 |                                                                                                                                            |                                                                                                                                                                                                                                                                                                                                       |
| <i>Viola odorata</i>                                                       | Cycloviolacin O16 |                                                                                                                                            |                                                                                                                                                                                                                                                                                                                                       |
| <i>Viola odorata</i> , <i>Psychotria leptothyrsa</i>                       | Violacin A        | Antimicrobial, Enzymatic-digestion, Hemolytic                                                                                              | Ireland, Colgrave, Nguyencong, <i>et al.</i> , (2006) <sup>134</sup>                                                                                                                                                                                                                                                                  |
| <i>Viola odorata</i> , <i>Viola adunca</i>                                 | cycloviolacin O8  | Nematocide, Antimicrobial                                                                                                                  | Colgrave, Kotze, Ireland, <i>et al.</i> , (2008) <sup>50</sup> ; Craik <i>et al.</i> , (1999) <sup>56</sup> ; Dutton <i>et al.</i> , (2004) <sup>68</sup> ; Ireland, Colgrave, & Craik, (2006) <sup>133</sup>                                                                                                                         |
| <i>Viola odorata</i> , <i>Viola tricolor</i> , <i>Palicourea tetragona</i> | cycloviolacin O22 | Insecticidal, Enzymatic-digestion, Antibacterial, Antifungal, Antiviral                                                                    | Hellinger, Koehbach, Soltis, <i>et al.</i> , (2015) <sup>125</sup> ; Ireland, Colgrave, & Craik, (2006) <sup>133</sup>                                                                                                                                                                                                                |
| <i>Viola odorata</i> , <i>Viola tricolor</i> , <i>Pombalia calceolaria</i> | Cycloviolacin-O4  | Antimicrobial, Anticancer                                                                                                                  | Craik <i>et al.</i> , (1999) <sup>56</sup> ; Ireland, Colgrave, & Craik, (2006) <sup>133</sup> ; Pinto <i>et al.</i> , (2018) <sup>285</sup>                                                                                                                                                                                          |
| <i>Viola philippica</i>                                                    | Mram 8            | Antimicrobial                                                                                                                              | He <i>et al.</i> , (2011) <sup>121</sup>                                                                                                                                                                                                                                                                                              |
| <i>Viola philippica</i>                                                    | vphi H            | Cytotoxic                                                                                                                                  | He <i>et al.</i> , (2011) <sup>121</sup>                                                                                                                                                                                                                                                                                              |
|                                                                            | vphi C            |                                                                                                                                            |                                                                                                                                                                                                                                                                                                                                       |
|                                                                            | vphi B            |                                                                                                                                            |                                                                                                                                                                                                                                                                                                                                       |

|                                                                                                                                                                                   |                                                                            |                                                             |                                                                                                                                                                                                                                                                     |
|-----------------------------------------------------------------------------------------------------------------------------------------------------------------------------------|----------------------------------------------------------------------------|-------------------------------------------------------------|---------------------------------------------------------------------------------------------------------------------------------------------------------------------------------------------------------------------------------------------------------------------|
| <i>Viola philippica</i>                                                                                                                                                           | Viphi G<br>Viphi D<br>Viphi E                                              | Anticancer, Antimicrobial, Cytotoxic                        | He <i>et al.</i> , (2011) <sup>121</sup>                                                                                                                                                                                                                            |
| <i>Viola philippica</i> , <i>Viola yedoensis</i>                                                                                                                                  | Cycloviolacin Y2                                                           | Antiviral, Insecticidal, Anti-HIV                           | Wang <i>et al.</i> , (2019) <sup>379</sup>                                                                                                                                                                                                                          |
| <i>Viola tricolor</i> , <i>Melicytus ramiflorus</i> , <i>Viola philippica</i>                                                                                                     | Mra30                                                                      | Cytotoxic, Enzymatic-degradation, Antimicrobial, Anticancer | He <i>et al.</i> , (2011) <sup>121</sup> ; Hellinger, Koebach, Soltis, <i>et al.</i> , (2015) <sup>125</sup> ; Trabi <i>et al.</i> , (2009) <sup>362</sup>                                                                                                          |
| <i>Viola tricolor</i> , <i>Viola abyssinica</i>                                                                                                                                   | vaby C<br>vaby E                                                           | Cytotoxic, Antimicrobial                                    | Hellinger, Koebach, Soltis, <i>et al.</i> , (2015) <sup>125</sup> ; Yeshak <i>et al.</i> , (2011) <sup>426</sup>                                                                                                                                                    |
| <i>Viola tricolor</i> , <i>Viola arvensis</i> , <i>Viola baoshanensis</i> , <i>Viola yedoensis</i> , <i>Viola tianshanica</i> , <i>Viola abyssinica</i> , <i>Viola philippica</i> | Varv peptide E (Cycloviolacin-O12)                                         | Antiviral, Anticancer, Nematocide, Anti-HIV                 | Colgrave, Kotze, Ireland, <i>et al.</i> , (2008) <sup>50</sup> ; Göransson <i>et al.</i> , (1999) <sup>99</sup> ; Svängård <i>et al.</i> , (2004) <sup>343</sup> ; Tang <i>et al.</i> , (2010) <sup>349</sup> ; C. K. L. Wang <i>et al.</i> , (2019) <sup>379</sup> |
| <i>Viola tricolor</i> , <i>Viola baoshanensis</i> , <i>Viola philippica</i>                                                                                                       | Viba 11                                                                    | Antimicrobial                                               | Hellinger, Koebach, Soltis, <i>et al.</i> , (2015) <sup>125</sup> ; J. Zhang <i>et al.</i> , (2009) <sup>436</sup>                                                                                                                                                  |
| <i>Viola tricolor</i> , <i>Viola biflora</i>                                                                                                                                      | vibi C                                                                     | Cytotoxic, Antimicrobial                                    | Herrmann <i>et al.</i> , (2008) <sup>127</sup>                                                                                                                                                                                                                      |
| <i>Viola tricolor</i> , <i>Viola biflora</i> , <i>Psychotria leptothyrsa</i>                                                                                                      | Vibi G                                                                     | Anticancer, Antimicrobial                                   | Herrmann <i>et al.</i> , (2008) <sup>127</sup>                                                                                                                                                                                                                      |
| <i>Viola tricolor</i> , <i>Viola ignobilis</i>                                                                                                                                    | Vigno 3<br>Vigno 4<br>Vigno 6<br>Vigno 7<br>Vigno 9<br>Viba 10<br>Vigno 10 | Antimicrobial                                               | Hashempour <i>et al.</i> , (2013) <sup>113</sup> ; Hellinger, Koebach, Soltis, <i>et al.</i> , (2015) <sup>125</sup>                                                                                                                                                |
| <i>Viola tricolor</i> , <i>Viola ignobilis</i>                                                                                                                                    | Vigno 5                                                                    | Anticancer, Antimicrobial, Cytotoxic                        | Esmaceli <i>et al.</i> , (2016) <sup>71</sup> ; Hashempour <i>et al.</i> , (2013) <sup>113</sup> ; Hellinger, Koebach, Soltis, <i>et al.</i> , (2015) <sup>125</sup>                                                                                                |
| <i>Viola yedoensis</i>                                                                                                                                                            | cycloviolacin Y3                                                           | Insecticidal, Anti-HIV, Antiviral                           | Wang <i>et al.</i> , (2019) <sup>379</sup>                                                                                                                                                                                                                          |
| <i>Viola yedoensis</i>                                                                                                                                                            | cycloviolacin Y1<br>Cycloviolacin Y4                                       | Nematocide, Hemolytic, Anti-HIV, Antiviral                  | Colgrave, Kotze, Ireland, <i>et al.</i> , (2008) <sup>50</sup> ; Wang <i>et al.</i> , (2019) <sup>379</sup>                                                                                                                                                         |
| <i>Viscum album</i>                                                                                                                                                               | Viscotoxin A3                                                              | Toxin                                                       | Samuelsson <i>et al.</i> , (1968) <sup>312</sup> ; Samuelsson & Pettersson, (1971) <sup>311</sup> ; SCHRADER & APEL, (1991) <sup>315</sup>                                                                                                                          |
| <i>Viscum album</i>                                                                                                                                                               | Viscotoxin B                                                               | Toxin                                                       | Olson & Samuelsson, (1972) <sup>265</sup>                                                                                                                                                                                                                           |
| <i>Viscum album</i>                                                                                                                                                               | Viscotoxin A2                                                              | Toxin                                                       | Olson & Samuelsson, (1972) <sup>265</sup>                                                                                                                                                                                                                           |
| <i>Viscum album</i>                                                                                                                                                               | Viscotoxins 1-PS, A1, A2, A3, and B                                        | Anticancer                                                  | Guzmán-Rodríguez <i>et al.</i> , (2015) <sup>105</sup> ; Nakamura &                                                                                                                                                                                                 |

---

|                                                                    |                                                                                                                         |                                                             |                                                                                             |
|--------------------------------------------------------------------|-------------------------------------------------------------------------------------------------------------------------|-------------------------------------------------------------|---------------------------------------------------------------------------------------------|
| <i>Viscum coloratum</i>                                            | Viscotoxin B2                                                                                                           | Anticancer, Antimicrobial                                   | Tsuya, (1979) <sup>242</sup>                                                                |
| <i>Vitis cinerea</i> var. <i>helleri</i> x<br><i>Vitis riparia</i> | Thaumatococin-like protein                                                                                              | Antimicrobial                                               | Nakamura & Tsuya, (1979) <sup>242</sup><br>Perazzolli <i>et al.</i> , (2010) <sup>282</sup> |
| <i>Vitis cinerea</i> var. <i>helleri</i> x<br><i>Vitis riparia</i> | Phase change-related protein                                                                                            | Antifungal                                                  | Perazzolli <i>et al.</i> , (2010) <sup>282</sup>                                            |
| <i>Wasabia japonica</i>                                            | WjAMP-1                                                                                                                 | Antimicrobial, Antifungal                                   | Kiba <i>et al.</i> , (2003) <sup>148</sup> ; Prabhu <i>et al.</i> , (2013) <sup>295</sup>   |
| <i>Xanthosoma sagittifolium</i>                                    | Kunitz-type serine protease inhibitor 1                                                                                 | Antibacterial                                               | Lima <i>et al.</i> , (2011) <sup>178</sup>                                                  |
| <i>Zea mays</i>                                                    | thirty-six peptides, including 5 dipeptides,<br>14 tripeptides, 9 tetrapeptides, 5<br>pentapeptides, and 3 hexapeptides | Antihypertensive                                            | Yano <i>et al.</i> , (1996) <sup>423</sup>                                                  |
| <i>Zea mays</i> , <i>Saccharum spp.</i>                            | Putative Rapid alkalization factor,<br>RALF                                                                             | RALF-Rapid-alkalinization-factor                            | Pearce <i>et al.</i> , (2001) <sup>277</sup>                                                |
| <i>Ziziphus jujuba</i>                                             | Snakin-Z                                                                                                                | Antibacterial, Antifungal,<br>Antioxidant, Enzyme-inhibitor | Daneshmand <i>et al.</i> , (2013) <sup>59</sup>                                             |

---

## References for Supplementary Table

- 1 T. L. Aboye, A. A. Strömstedt, S. Gunasekera, J. G. Bruhn, H. El-Seedi, K. J. Rosengren and U. Göransson, A cactus-derived toxin-like cystine knot peptide with selective antimicrobial activity, *ChemBioChem*, 2015, **16**, 1068–1077.
- 2 H. Agrawal, R. Joshi and M. Gupta, Isolation and characterisation of enzymatic hydrolysed peptides with antioxidant activities from green tender sorghum, *LWT - Food Sci. Technol.*, 2017, **84**, 608–616.
- 3 W. F. Altei, D. G. Picchi, B. M. Abissi, G. M. Giesel, O. Flausino, M. Reboud-Ravaux, H. Verli, E. Crusca, E. R. Silveira, E. M. Cilli and V. S. Bolzani, Jatrophidin I, a cyclic peptide from Brazilian *Jatropha curcas* L.: Isolation, characterization, conformational studies and biological activity, *Phytochemistry*, 2014, **107**, 91–96.
- 4 J. L. Anaya-López, J. E. López-Meza, V. M. Baizabal-Aguirre, H. Cano-Camacho and A. Ochoa-Zarzosa, Fungicidal and cytotoxic activity of a *Capsicum chinense* defensin expressed by endothelial cells, *Biotechnol. Lett.*, 2006, **28**, 1101–1108.
- 5 F. O. Asiegbu, W. Choi, G. Li, J. Nahalkova and R. A. Dean, Isolation of a novel antimicrobial peptide gene (Sp-AMP) homologue from *Pinus sylvestris* (Scots pine) following infection with the root rot fungus *Heterobasidion annosum*, *FEMS Microbiol. Lett.*, 2003, **228**, 27–31.
- 6 A. A. Astafieva, E. A. Rogozhin, Y. A. Andreev, T. I. Odintsova, S. A. Kozlov, E. V. Grishin and T. A. Egorov, A novel cysteine-rich antifungal peptide ToAMP4 from *Taraxacum officinale* Wigg. flowers, *Plant Physiol. Biochem.*, 2013, **70**, 93–99.
- 7 A. A. Astafieva, E. A. Rogozhin, T. I. Odintsova, N. V. Khadeeva, E. V. Grishin and T. A. Egorov, Discovery of novel antimicrobial peptides with unusual cysteine motifs in dandelion *Taraxacum officinale* Wigg. flowers, *Peptides*, 2012, **36**, 266–271.
- 8 P. Atiwetin, S. Harada and K. Kamei, Serine proteinase inhibitor from wax gourd (*Benincasa hispida* [Thunb] Cogn.) seeds, *Biosci. Biotechnol. Biochem.*, 2006, **70**, 743–745.
- 9 A. F. Attah, R. Hellinger, M. A. Sonibare, J. O. Moody, S. Arrowsmith, S. Wray and C. W. Gruber, Ethnobotanical survey of *Rinorea dentata* (Violaceae) used in South-Western Nigerian ethnomedicine and detection of cyclotides, *J. Ethnopharmacol.*, 2016, **179**, 83–91.
- 10 C. Auvin-Guette, C. Baraguey, A. Blond, H. S. Xavier, J. L. Pousset and B. Bodo, Pohljanins A, B and C, cyclic peptides from the latex of *Jatropha pohliana* ssp. molissima, *Tetrahedron*, 1999, **55**, 11495–11510.
- 11 C. Auvin, C. Baraguey, A. Blond, F. Lezenven, J. L. Pousset and B. Bodo, Curcacycline B, a cyclic nonapeptide from *Jatropha curcas* enhancing rotamase activity of cyclophilin, *Tetrahedron Lett.*, 1997, **38**, 2845–2848.
- 12 O. Avrutina, H. U. Schmoltd, D. Gabrijelcic-Geiger, L. N. Dung, C. P. Sommerhoff, U. Diederichsen and H. Kolmar, Trypsin inhibition by macrocyclic and open-chain variants of the squash inhibitor MCoTI-II, *Biol. Chem.*, 2005, **386**, 1301–1306.
- 13 E. Babini, D. Tagliazucchi, S. Martini, L. Dei Più and A. Gianotti, LC-ESI-QTOF-MS identification of novel antioxidant peptides obtained by enzymatic and microbial hydrolysis of vegetable proteins, *Food Chem.*, 2017, **228**, 186–196.
- 14 C. Baraguey, A. Blond, I. Correia, J. L. Pousset, B. Bodo and C. Auvin-Guette, Mahafacyclin A, a cyclic heptapeptide from *Jatropha mahafalensis* exhibiting  $\beta$ -bulge conformation, *Tetrahedron Lett.*, 2000, **41**, 325–329.
- 15 S. C. Barbosa, T. M. Nobre, D. Volpati, P. Ciancaglini, E. M. Cilli, E. N. Lorenzón and O. N. Oliveira, The importance of cyclic structure for Labaditin on its antimicrobial activity against *Staphylococcus aureus*, *Colloids Surfaces B Biointerfaces*, 2016, **148**, 453–459.
- 16 G. C. V. Bard, V. V. Nascimento, A. E. A. Oliveira, R. Rodrigues, M. Da Cunha, G. B. Dias, I. M. Vasconcelos, A. O. Carvalho and V. M. Gomes, Vicilin-like peptides from *Capsicum baccatum* L. seeds are  $\alpha$ -amylase inhibitors and exhibit antifungal activity against important yeasts in medical mycology, *Biopolym. - Pept. Sci. Sect.*, 2014, **102**, 335–343.
- 17 D. G. Barry, N. L. Daly, H. R. Bokesch, K. R. Gustafson and D. J. Craik, Solution Structure of the Cyclotide Palicourein: Implications for the Development of a Pharmaceutical Framework, *Structure*, 2004, **12**, 85–94.
- 18 A. J. J. Van Den Berg, S. F. A. J. Horsten, J. J. Kettenes-Van Den Bosch, C. J. Beukelman, B. H. Kroes, B. R. Leeftang and R. P. Labadie, Podacycline A and B, two cyclic peptides in the latex of *Jatropha podagrica*, *Phytochemistry*, 1996, **42**, 129–133.
- 19 M. R. Bleackley, J. A. E. Payne, B. M. E. Hayes, T. Durek, D. J. Craik, T. M. A. Shafee, I. K. H. Poon, M. D. Hulett, N. L. Van Der Weerden and M. A. Anderson,

- Nicotiana glauca* defensin chimeras reveal differences in the mechanism of fungal and tumor cell killing and an enhanced antifungal variant, *Antimicrob. Agents Chemother.*, 2016, **60**, 6302–6312.
- 20 C. Bloch, S. U. Patel, F. Baud, M. J. J. M. Zvelebil, M. D. Carr, P. J. Sadler and J. M. Thornton, 1H NMR structure of an antifungal  $\gamma$ -thionin protein SI $\alpha$ 1: Similarity to scorpion toxins, *Proteins Struct. Funct. Genet.*, 1998, **32**, 334–349.
- 21 A. F. Bobey, M. E. F. Pinto, E. M. Cilli, N. P. Lopes and V. D. S. Bolzani, A Cyclotide Isolated from *Noisettia orchidiflora* (Violaceae), *Planta Med.*, 2018, **84**, 947–952.
- 22 H. Bohlmann, S. Clausen, S. Behnke, H. Giese, C. Hiller, U. Reimann-Philipp, G. Schrader, V. Barkholt and K. Apel, Leaf-specific thionins of barley—a novel class of cell wall proteins toxic to plant-pathogenic fungi and possibly involved in the defence mechanism of plants, *EMBO J.*, 1988, **7**, 1559–1565.
- 23 H. R. Bokesch, R. D. Charan, K. M. Meragelman, J. A. Beutler, R. Gardella, B. R. O’Keefe, T. C. McKee and J. B. McMahon, Isolation and characterization of anti-HIV peptides from *Dorstenia contrajerva* and *Treulia obovoidea*, *FEBS Lett.*, 2004, **567**, 287–290.
- 24 H. R. Bokesch, L. K. Pannell, P. K. Cochran, R. C. Sowder, T. C. McKee and M. R. Boyd, A novel anti-HIV macrocyclic peptide from *Palicourea condensata*, *J. Nat. Prod.*, 2001, **64**, 249–250.
- 25 W. F. Broekaert, W. Mariën, F. R. G. Terras, M. F. C. D. Bolle, J. Vanderleyden, B. P. A. Cammue, P. Proost, J. Van Damme, L. Dillen, M. Claeys and S. B. Rees, Antimicrobial Peptides from *Amaranthus Caudatus* Seeds with Sequence Homology to the Cysteine/Glycine-Rich Domain of Chitin-Binding Proteins, *Biochemistry*, 1992, **31**, 4308–4314.
- 26 W. Broekaert, H. I. Lee, A. Kush, N. H. Chua and N. Raikhel, Wound-induced accumulation of mRNA containing a hevein sequence in laticifers of rubber tree (*Hevea brasiliensis*), *Proc. Natl. Acad. Sci. U. S. A.*, 1990, **87**, 7633–7637.
- 27 A. M. Broussalis, U. Göransson, J. D. Coussio, G. Ferraro, V. Martino and P. Claeson, First cyclotide from *Hybanthus* (Violaceae), *Phytochemistry*, 2001, **58**, 47–51.
- 28 V. Buchanan-Wollaston, Isolation of cDNA clones for genes that are expressed during leaf senescence in *Brassica napus*. Identification of a gene encoding a senescence-specific metallothionein-like protein, *Plant Physiol.*, 1994, **105**, 839–846.
- 29 B. P. A. Cammue, M. F. C. De Bolle, F. R. G. Terras, P. Proost, J. Van Damme, S. B. Rees, J. Vanderleyden and W. F. Broekaert, Isolation and characterization of a novel class of plant antimicrobial peptides from *Mirabilis jalapa* L. seeds, *J. Biol. Chem.*, 1992, **267**, 2228–2233.
- 30 H. Cao, T. Ke, R. Liu, J. Yu, C. Dong, M. Cheng, J. Huang and S. Liu, Identification of a novel proline-rich antimicrobial peptide from *Brassica napus*, *PLoS One*, 2015, **10**, 1–13.
- 31 R. Capparelli, M. G. Amoroso, D. Palumbo, M. Iannaccone, C. Faleri and M. Cresti, Two plant purindolines colocalize in wheat seed and in vitro synergistically fight against pathogens, *Plant Mol. Biol.*, 2005, **58**, 857–867.
- 32 A. Castagnaro, C. Marañá, P. Carbonero and F. García-Olmedo, Extreme divergence of a novel wheat thionin generated by a mutational burst specifically affecting the mature protein domain of the precursor, *J. Mol. Biol.*, 1992, **224**, 1003–1009.
- 33 A. Castagnaro, C. Marañá, P. Carbonero and F. García-Olmedo, cDNA cloning and nucleotide sequences of alpha 1 and alpha 2 thionins from hexaploid wheat endosperm., *Plant Physiol.*, 1994, **106**, 1221–1222.
- 34 A. Cavazos and E. Gonzalez de Mejia, Identification of Bioactive Peptides from Cereal Storage Proteins and Their Potential Role in Prevention of *Chronic Diseases*, *Compr. Rev. Food Sci. Food Saf.*, 2013, **12**, 364–380.
- 35 A. Chagolla-Lopez, A. Blanco-Labra, A. Patthy, R. Sánchez and S. Pongor, A novel  $\alpha$ -amylase inhibitor from amaranth (*Amaranthus hypocondriacus*) seeds, *J. Biol. Chem.*, 1994, **269**, 23675–23680.
- 36 C. Chaichana, A. Khamwut, J. Jaresitthikunchai, N. Phaonakrop, S. Ratanapo, S. Roytrakul and N. P. T-Thienprasert, A Novel Anti-cancer Peptide Extracted from *Gynura pseudochina* Rhizome: Cytotoxicity Dependent on Disulfide Bond Formation, *Int. J. Pept. Res. Ther.*, 2019, **25**, 769–777.
- 37 L. Y. Chan, W. He, N. Tan, G. Zeng, D. J. Craik and N. L. Daly, A new family of cystine knot peptides from the seeds of *Momordica cochinchinensis*, *Peptides*, 2013, **39**, 29–35.
- 38 V. H. S. Chang, D. H. A. Yang, H. H. Lin, G. Pearce, C. A. Ryan and Y. C. Chen, IbACP, a sixteen-amino-acid peptide isolated from *Ipomoea batatas* leaves, induces

- carcinoma cell apoptosis, *Peptides*, 2013, **47**, 148–156.
- 39 L. Chao-Ming, T. Ning-Hua, M. Qing, Z. Hui-Lan, H. Xiao-Jiang, W. Yu and Z. Jun, Cyclopeptide from the seeds of *Annona squamosa*, *Phytochemistry*, 1997, **45**, 521–523.
- 40 B. Chen, M. L. Colgrave, N. L. Daly, K. J. Rosengren, K. R. Gustafson and D. J. Craik, Isolation and characterization of novel cyclotides from *Viola hederaceae*: solution structure and anti-HIV activity of vhl-1, a leaf-specific expressed cyclotide, *J. Biol. Chem.*, 2005, **280**, 22395–22405.
- 41 B. Chen, M. L. Colgrave, C. Wang and D. J. Craik, Cycloviolacin H4, a hydrophobic cyclotide from *Viola hederaceae*, *J. Nat. Prod.*, 2006, **69**, 23–28.
- 42 G. H. Chen, M. P. Hsu, C. H. Tan, H. Y. Sung, C. G. Kuo, M. J. Fan, H. M. Chen, S. Chen and C. S. Chen, Cloning and characterization of a plant defensin VaD1 from azuki bean, *J. Agric. Food Chem.*, 2005, **53**, 982–988.
- 43 J. J. Chen, G. H. Chen, H. C. Hsu, S. S. Li and C. S. Chen, Cloning and Functional Expression of a Mungbean Defensin VrD1 in *Pichia pastoris*, *J. Agric. Food Chem.*, 2004, **52**, 2256–2261.
- 44 K. C. Chen, C. Y. Lin, C. C. Kuan, H. Y. Sung and C. S. Chen, A novel defensin encoded by a mungbean cDNA exhibits insecticidal activity against bruchid, *J. Agric. Food Chem.*, 2002, **50**, 7258–7263.
- 45 M. S. Choi, Y. H. Kim, H. M. Park, B. Y. Seo, J. K. Jung, S. T. Kim, M. C. Kim, D. B. Shin, H. T. Yun, I. S. Choi, C. K. Kim and J. Y. Lee, Expression of BrD1, a plant defensin from *Brassica rapa*, confers resistance against brown planthopper (*Nilaparvata lugens*) in transgenic rices, *Mol. Cells*, 2009, **28**, 131–137.
- 46 K. T. Chu and T. B. Ng, Isolation of a large thaumatin-like antifungal protein from seeds of the Kweilin chestnut *Castanopsis chinensis*, *Biochem. Biophys. Res. Commun.*, 2003, **301**, 364–370.
- 47 P. H. Chuang, P. W. Hsieh, Y. L. Yang, K. F. Hua, F. R. Chang, J. Shiea, S. H. Wu and Y. C. Wu, Cyclopeptides with anti-inflammatory activity from seeds of *Annona montana*, *J. Nat. Prod.*, 2008, **71**, 1365–1370.
- 48 M. Ciardiello, D. Meleleo, G. Saviano, R. Crescenzo and V. Carratore, Kissper, a kiwi fruit peptide with channel-like activity: Structural and functional features, *J. Pept. Sci.*, 2007, 16–26.
- 49 M. L. Colgrave, A. C. Kotze, Y. Huang, J. O. Grady, S. M. Simonsen and D. J. Craik, Cyclotides : Natural , Circular Plant Peptides that Possess Significant Activity against Gastrointestinal Nematode Parasites of Sheep, *Biochemistry*, 2008, **47**, 5581–5589.
- 50 M. L. Colgrave, A. C. Kotze, D. C. Ireland, C. K. Wang and D. J. Craik, The Anthelmintic Activity of the Cyclotides : Natural Variants with Enhanced Activity, *Chembiochem*, 2008, **9**, 1939–1945.
- 51 F. J. Colilla, A. Rocher and E. Mendez,  $\gamma$ -Purothionins: amino acid sequence of two polypeptides of a new family of thionins from wheat endosperm, *FEBS Lett.*, 1990, **270**, 191–194.
- 52 J. A. Condie, G. Nowak, D. W. Reed, J. J. Balsevich, M. J. T. Reaney, P. G. Arnison and P. S. Covello, The biosynthesis of Caryophyllaceae-like cyclic peptides in *Saponaria vaccaria* L. from DNA-encoded precursors, *Plant J.*, 2011, **67**, 682–690.
- 53 R. Connors, A. V. Konarev, J. Forsyth, A. Lovegrove, J. Marsh, T. Joseph-Horne, P. Shewry and R. L. Brady, An unusual helix-turn-helix protease inhibitory motif in a novel trypsin inhibitor from seeds of *Veronica hederifolia* L., *J. Biol. Chem.*, 2007, **282**, 27760–27768.
- 54 B. J. C. Cornelissen, R. A. M. Hooft Van Huijsdijnen and J. F. Bol, A tobacco mosaic virus-induced tobacco protein is homologous to the sweet-tasting protein thaumatin, *Nature*, 1986, **321**, 531–532.
- 55 M. A. Corrons, C. S. Liggieri, S. A. Trejo and M. A. Bruno, ACE-inhibitory peptides from bovine caseins released with peptidases from *Maclura pomifera* latex, *Food Res. Int.*, 2017, **93**, 8–15.
- 56 D. J. Craik, N. L. Daly, T. Bond and C. Waive, Plant cyclotides: A unique family of cyclic and knotted proteins that defines the cyclic cystine knot structural motif, *J. Mol. Biol.*, 1999, **294**, 1327–1336.
- 57 R. Dahiya, Synthetic and pharmacological studies on longicalycinin A., *Pak. J. Pharm. Sci.*, 2007, **20**, 317–323.
- 58 N. L. Daly, A. Koltay, K. R. Gustafson, M. R. Boyd, J. R. Casas-Finet and D. J. Craik, Solution structure by NMR of circulin A: A macrocyclic knotted peptide having anti-HIV activity, *J. Mol. Biol.*, 1999, **285**, 333–345.

- 59 F. Daneshmand, H. Zare-Zardini and L. Ebrahimi, Investigation of the antimicrobial activities of Snakin-Z, a new cationic peptide derived from *Zizyphus jujuba* fruits, *Nat. Prod. Res.*, 2013, **27**, 2292–2296.
- 60 C. Daskaya-Dikmen, A. Yucetepe, F. Karbancioglu-Guler, H. Daskaya and B. Ozcelik, Angiotensin-I-converting enzyme (ACE)-inhibitory peptides from plants, *Nutrients*, 2017, **9**, 1–19.
- 61 V. S. De-Paula, G. Razzera, L. Medeiros, C. A. Miyamoto, M. S. Almeida, E. Kurtenbach, F. C. L. Almeida and A. P. Valente, Evolutionary relationship between defensins in the Poaceae family strengthened by the characterization of new sugarcane defensins, *Plant Mol. Biol.*, 2008, **68**, 321–335.
- 62 A. De Beer and M. A. Vivier, Four plant defensins from an indigenous South African Brassicaceae species display divergent activities against two test pathogens despite high sequence similarity in the encoding genes, *BMC Res. Notes*, 2011, **4**, 459.
- 63 M. F. C. De Bolle, K. M. M. David, S. B. Rees, J. Vanderleyden, B. P. A. Cammue and W. F. Broekaert, Cloning and characterization of a cDNA encoding an antimicrobial chitin-binding protein from amaranth, *Amaranthus caudatus*, *Plant Mol. Biol.*, 1993, **22**, 1187–1190.
- 64 M. F. C. De Bolle, K. Eggermont, R. E. Duncan, R. W. Osborn, F. R. G. Terras and W. F. Broekaert, Cloning and characterization of two cDNA clones encoding seed-specific antimicrobial peptides from *Mirabilis jalapa* L., *Plant Mol. Biol.*, 1995, **28**, 713–721.
- 65 R. Derua, K. R. Gustafson and L. K. Pannell, Analysis of the Disulfide Linkage Pattern in Circulin A and B, HIV-Inhibitory Macrocyclic Peptides A wide taxonomic distribution of terrestrial plants produce linear peptides and low molecular weight proteins which may function as defensive agents agains, *Biochem. Biophys. Res. Commun.*, 1996, **638**, 632–638.
- 66 P. M. Dracatos, N. L. Van Der Weerden, K. T. Carroll, E. D. Johnson, K. M. Plummer and M. A. Anderson, Inhibition of cereal rust fungi by both class I and II defensins derived from the flowers of *Nicotiana glauca*, *Mol. Plant Pathol.*, 2014, **15**, 67–79.
- 67 A. Dunkel, J. Köster and T. Hofmann, Molecular and sensory characterization of  $\gamma$ -glutamyl peptides as key contributors to the kokumi taste of edible beans (*Phaseolus vulgaris* L.), *J. Agric. Food Chem.*, 2007, **55**, 6712–6719.
- 68 J. L. Dutton, R. F. Renda, C. Waive, R. J. Clark, N. L. Daly, C. V. Jennings, M. A. Anderson and D. J. Craik, Conserved Structural and Sequence Elements Implicated in the Processing of Gene-encoded Circular Proteins \*, *J. Biol. Chem.*, 2004, **279**, 46858–46867.
- 69 A. El-kereamy, I. El-sharkawy, R. Ramamoorthy, A. Taheri, D. Errampalli, P. Kumar and S. Jayasankar, Prunus domestica pathogenesis-related protein-5 activates the defense response pathway and enhances the resistance to fungal infection, *PLoS One*, 2011, **6**, 1–11.
- 70 P. Epple, K. Apel and H. Bohlmann, ESTs reveal a multigene family for plant defensins in *Arabidopsis thaliana*, *FEBS Lett.*, 1997, **400**, 168–172.
- 71 M. A. Esmaeili, N. Abagheri-Mahabadi, H. Hashempour, M. Farhadpour, C. W. Gruber and A. Ghassempour, Viola plant cyclotide vigno 5 induces mitochondria-mediated apoptosis via cytochrome C release and caspases activation in cervical cancer cells, *Fitoterapia*, 2016, **109**, 162–168.
- 72 C. Esteve, M. L. Marina and M. C. García, Novel strategy for the revalorization of olive (*Olea europaea*) residues based on the extraction of bioactive peptides, *Food Chem.*, 2015, **167**, 272–280.
- 73 X. Fan, H. Schäfer, J. Reichling and M. Wink, Bactericidal properties of the antimicrobial peptide Ib-AMP4 from *Impatiens balsamina* produced as a recombinant fusion-protein in *Escherichia coli*, *Biotechnol. J.*, 2013, **8**, 1213–1220.
- 74 F. Fant, W. F. Vranken and F. A. M. Borremans, The three-dimensional solution structure of *Aesculus hippocastanum* antimicrobial protein 1 determined by 1H nuclear magnetic resonance, *Proteins Struct. Funct. Genet.*, 1999, **37**, 388–403.
- 75 A. FAVEL, H. MATTRAS, M. A. COLETTI-PREVIERO, R. ZWILLING, E. A. ROBINSON and B. CASTRO, Protease inhibitors from *Ecballium elaterium* seeds, *Int. J. Pept. Protein Res.*, 1989, **33**, 202–208.
- 76 E. I. Finkina, S. V. Balandin, M. V. Serebryakova, N. A. Potapenko, A. A. Tagaev and T. V. Ovchinnikova, Purification and primary structure of novel lipid transfer proteins from germinated lentil (*lens culinaris*) seeds, *Biochem.*, 2007, **72**, 430–438.
- 77 E. I. Finkina, E. I. Shramova, A. A. Tagaev and T. V. Ovchinnikova, A novel defensin from the lentil *Lens culinaris* seeds, *Biochem. Biophys. Res. Commun.*, 2008, **371**, 860–865.
- 78 S. Fischer, M. Grote, B. Fahlbusch, W. D. Müller, D. Kraft and R. Valenta, Characterization of Phl p 4, a major timothy grass (*Phleum pratense*) pollen allergen, *J.*

- Allergy Clin. Immunol.*, 1996, **98**, 189–198.
- 79 O. L. Franco, A. M. Murad, J. R. Leite, P. A. M. Mendes, M. V. Prates and C. Bloch, Identification of a cowpea  $\gamma$ -thionin with bactericidal activity, *FEBS J.*, 2006, **273**, 3489–3497.
- 80 C. D. T. de Freitas, F. C. Sousa Nogueira, I. M. Vasconcelos, J. T. Abreu Oliveira, G. B. Domont and M. V. Ramos, Osmotin purified from the latex of *Calotropis procera*: Biochemical characterization, biological activity and role in plant defense, *Plant Physiol. Biochem.*, 2011, **49**, 738–743.
- 81 K. Fujikawa, Y. Suketa, K. Hayashi and T. Suzuki, Chemical structure of circulin A, *Experientia*, 1965, **1259**, 307–308.
- 82 M. Fujimura, M. Ideguchi, Y. Minami, K. Watanabe and K. Tadera, Purification, characterization, and sequencing of novel antimicrobial peptides, Tu-AMP 1 and Tu-AMP 2, from bulbs of tulip (*Tulipa gesneriana* L.), *Biosci. Biotechnol. Biochem.*, 2004, **68**, 571–577.
- 83 M. Fujimura, M. Ideguchi, Y. Minami, K. Watanabe and K. Tadera, Amino acid sequence and antimicrobial activity of chitin-binding peptides, Pp-AMP 1 and Pp-AMP 2, from Japanese bamboo shoots (*Phyllostachys pubescens*), *Biosci. Biotechnol. Biochem.*, 2005, **69**, 642–645.
- 84 M. Fujimura, Y. Minami, K. Watanabe and K. Tadera, Purification, characterization, and sequencing of a novel type of antimicrobial peptides, fa-amp1 and fa-amp2, from seeds of buckwheat (*fagopyrum esculentum* moench.), *Biosci. Biotechnol. Biochem.*, 2003, **67**, 1636–1642.
- 85 H. T. Funk, S. Berg, K. Krupinska, U. G. Maier and K. Krause, Complete DNA sequences of the plastid genomes of two parasitic flowering plant species, *Cuscuta reflexa* and *Cuscuta gronovii*, *BMC Plant Biol.*, 2007, **7**, 1–12.
- 86 P. D. Games, I. S. dos Santos, É. O. Mello, M. S. S. Diz, A. O. Carvalho, G. A. de Souza-Filho, M. Da Cunha, I. M. Vasconcelos, B. dos S. Ferreira and V. M. Gomes, Isolation, characterization and cloning of a cDNA encoding a new antifungal defensin from *Phaseolus vulgaris* L. seeds, *Peptides*, 2008, **29**, 2090–2100.
- 87 A. G. Gao, S. M. Hakimi, C. A. Mittanck, Y. Wu, B. M. Woerner, D. M. Stark, D. M. Shah, J. Liang and C. M. T. Rommens, Fungal pathogen protection in potato by expression of a plant defensin peptide, *Nat. Biotechnol.*, 2000, **18**, 1307–1310.
- 88 P. García-Mora, M. Martín-Martínez, M. Angeles Bonache, R. González-Múniz, E. Peñas, J. Frias and C. Martínez-Villaluenga, Identification, functional gastrointestinal stability and molecular docking studies of lentil peptides with dual antioxidant and angiotensin I converting enzyme inhibitory activities, *Food Chem.*, 2017, **221**, 464–472.
- 89 M. C. García, J. Endermann, E. González-García and M. L. Marina, HPLC-Q-TOF-MS Identification of Antioxidant and Antihypertensive Peptides Recovered from Cherry (*Prunus cerasus* L.) Subproducts, *J. Agric. Food Chem.*, 2015, **63**, 1514–1520.
- 90 M. C. García, P. Puchalska, C. Esteve and M. L. Marina, Vegetable foods: A cheap source of proteins and peptides with antihypertensive, antioxidant, and other less occurrence bioactivities, *Talanta*, 2013, **106**, 328–349.
- 91 M. Gavrović-Jankulović, T. Ćirković, O. Vučković, M. Atanasković-Marković, A. Petersen, G. Gojgić, L. Burazer and R. M. Jankov, Isolation and biochemical characterization of a thaumatin-like kiwi allergen, *J. Allergy Clin. Immunol.*, 2002, **110**, 805–810.
- 92 S. L. Gerlach, R. Burman, L. Bohlin, D. Mondal and U. Göransson, Isolation, characterization, and bioactivity of cyclotides from the micronesian plant *Psychotria leptothyrsa*, *J. Nat. Prod.*, 2010, **73**, 1207–1213.
- 93 S. L. Gerlach, R. Rathinakumar, G. Chakravarty, U. Göransson, W. C. Wimley, S. P. Darwin and D. Mondal, Anticancer and chemosensitizing abilities of cycloviolacin 02 from *Viola odorata* and psyle cyclotides from *Psychotria leptothyrsa.*, *Biopolymers*, 2010, **94**, 617–625.
- 94 H. Germain, É. Chevalier, S. Caron and D. P. Matton, Characterization of five RALF-like genes from *Solanum chacoense* provides support for a developmental role in plants, *Planta*, 2005, **220**, 447–454.
- 95 A. T. Girgih, R. He and R. E. Aluko, Kinetics and molecular docking studies of the inhibitions of angiotensin converting enzyme and renin activities by hemp seed (*Cannabis sativa* L.) Peptides, *J. Agric. Food Chem.*, 2014, **62**, 4135–4144.
- 96 A. T. Girgih, R. He, S. Malomo, M. Offengenden, J. Wu and R. E. Aluko, Structural and functional characterization of hemp seed (*Cannabis sativa* L.) protein-derived antioxidant and antihypertensive peptides, *J. Funct. Foods*, 2014, **6**, 384–394.
- 97 A. M. Giudici, M. C. Regente, J. Villalaín, K. Pfüller, U. Pfüller and L. De La Canal, Mistletoe viscotoxins induce membrane permeabilization and spore death in phytopathogenic fungi, *Physiol. Plant.*, 2004, **121**, 2–7.

- 98 E. González-García, M. C. García and M. L. Marina, Capillary liquid chromatography-ion trap-mass spectrometry methodology for the simultaneous quantification of four angiotensin-converting enzyme-inhibitory peptides in Prunus seed hydrolysates, *J. Chromatogr. A*, 2018, **1540**, 47–54.
- 99 U. Göransson, T. Luijendijk, S. Johansson, L. Bohlin and P. Claeson, Seven novel macrocyclic polypeptides from *Viola arvensis*, *J. Nat. Prod.*, 1999, **62**, 283–286.
- 100 W. E. Gristwood, Determination of fluparoxan (GR50360) in plasma by gas chromatography, *J. Chromatogr. B Biomed. Sci. Appl.*, 1990, **527**, 436–440.
- 101 Y. Gu and J. Wu, LC-MS/MS coupled with QSAR modeling in characterising of angiotensin I-converting enzyme inhibitory peptides from soybean proteins, *Food Chem.*, 2013, **141**, 2682–2690.
- 102 C. Guang and R. D. Phillips, Purification, activity and sequence of angiotensin converting enzyme inhibitory peptide from alicase hydrolysate of peanut flour, *J. Agric. Food Chem.*, 2009, **57**, 10102–10106.
- 103 K. R. Gustafson, L. K. Walton, R. C. Sowder, D. G. Johnson, L. K. Pannell, J. H. Cardellina and M. R. Boyd, New Circulin Macrocyclic Polypeptides from *Chassalia parvifolia*, *J. Nat. Prod.*, 2000, 176–178.
- 104 J. J. Guzmán-Rodríguez, R. López-Gómez, L. M. Suárez-Rodríguez, R. Salgado-Garciglia, L. C. Rodríguez-Zapata, A. Ochoa-Zarzosa and J. E. López-Meza, Antibacterial activity of defensin PaDef from avocado fruit (*Persea americana* var. *drymifolia*) expressed in endothelial cells against *Escherichia coli* and *Staphylococcus aureus*, *Biomed Res. Int.*, 2013, **2013**,
- 105 J. J. Guzmán-Rodríguez, A. Ochoa-Zarzosa, R. López-Gómez and J. E. López-Meza, Plant antimicrobial peptides as potential anticancer agents, *Biomed Res. Int.*, 2015, **2015**,
- 106 M. Hahn, S. Jungling and W. Knogge, Cultivar-specific elicitation of barley defense reactions by the phytotoxic peptide NIP1 from *Rhynchosporium secalis*, In *Molecular Plant-Microbe Interactions*, 1993, **6**, 745–754.
- 107 U. C. Haldar, S. K. Saha, R. C. Beavis and N. K. Sinha, Trypsin inhibitors from ridged gourd (*Luffa acutangula* Linn.) seeds: purification, properties, and amino acid sequences, *Protein J.*, 1996, **15**, 177–184.
- 108 Y. F. Hallock, R. C. Sowder, L. K. Pannell, C. B. Hughes, D. G. Johnson, R. Gulakowski, J. H. Cardellina and M. R. Boyd, Cycloviolins A-D, anti-HIV macrocyclic peptides from *Leonia cymosa*, *J. Org. Chem.*, 2000, **65**, 124–128.
- 109 N. Hamato, T. Koshihara, T. N. Pham, Y. Tatsumi, D. Nakamura, R. Takano, K. Hayashi, Y. M. Hong and S. Hara, Trypsin and elastase inhibitors from bitter melon (*Momordica charantia* LINN.) seeds: Purification, amino acid sequences, and inhibitory activities of four new inhibitors, *J. Biochem.*, 1995, **117**, 432–437.
- 110 J. N. Hanks, A. K. Snyder, M. A. Graham, R. K. Shah, L. A. Blaylock, M. J. Harrison and D. M. Shah, Defensin gene family in *Medicago truncatula*: Structure, expression and induction by signal molecules, *Plant Mol. Biol.*, 2005, **58**, 385–399.
- 111 S. Hara, J. Makino and T. Ikenaka, Amino acid sequences and disulfide bridges of serine proteinase inhibitors from bitter melon (*Momordica charantia* LINN.) seeds, *J. Biochem.*, 1989, **105**, 88–91.
- 112 M. Haruta and C. P. Constabel, Rapid alkalization factors in poplar cell cultures. Peptide isolation, cDNA cloning, and differential expression in leaves and methyl jasmonate-treated cells, *Plant Physiol.*, 2003, **131**, 814–823.
- 113 H. Hashempour, J. Koehbach, N. L. Daly, A. Ghassempour and C. W. Gruber, Characterizing circular peptides in mixtures: Sequence fragment assembly of cyclotides from a violet plant by MALDI-TOF/TOF mass spectrometry, *Amino Acids*, 2013, **44**, 581–595.
- 114 G. M. Hass and M. A. Hermodson, Amino Acid Sequence of a Carboxypeptidase Inhibitor from Tomato Fruit, *Biochemistry*, 1981, **20**, 2256–2260.
- 115 T. Hatakeyama, M. Hiraoka and G. Funatsu, Amino Acid Sequences of the Two Smallest Trypsin Inhibitors from Sponge Gourd Seeds, *Agric. Biol. Chem.*, 1991, **55**, 2641–2642.
- 116 K. Hayashi, Y. Suketa and T. Suzuki, Chemical structure of circulin B, *Experientia*, 1966, **173**, 1964–1965.
- 117 K. Hayashi, T. Takehisa, N. Hamato, R. Takano, S. Hara, T. Miyata and H. Kato, Inhibition of serine proteases of the blood coagulation system by squash family protease inhibitors, *J. Biochem.*, 1994, **116**, 1013–1018.
- 118 B. M. E. Hayes, M. R. Bleackley, J. L. Wiltshire, M. A. Anderson, A. Traven and N. L. Van Der Weerden, Identification and mechanism of action of the plant defensin nad1 as a new member of the antifungal drug arsenal against *Candida albicans*, *Antimicrob. Agents Chemother.*, 2013, **57**, 3667–3675.

- 119 H. L. He, D. Liu and C. B. Ma, Review on the Angiotensin-I-Converting Enzyme (ACE) Inhibitor Peptides from Marine Proteins, *Appl. Biochem. Biotechnol.*, 2013, **169**, 738–749.
- 120 W. J. He, L. Y. Chan, R. J. Clark, J. Tang, G. Z. Zeng, O. L. Franco, C. Cantacessi, D. J. Craik, N. L. Daly and N. H. Tan, Novel Inhibitor Cystine Knot Peptides from *Momordica charantia*, *PLoS One*, 2013, **8**, 13–16.
- 121 W. He, L. Yue, G. Zeng, N. L. Daly, D. J. Craik and N. Tan, Isolation and characterization of cytotoxic cyclotides from *Viola philippica*, *Peptides*, 2011, **32**, 1719–1723.
- 122 N. Hegedüs and F. Marx, Antifungal proteins: More than antimicrobials?, *Fungal Biol. Rev.*, 2013, **26**, 132–145.
- 123 A. Heitz, J. F. Hernandez, J. Gagnon, Thai Trinh Hong, T. Châu Pham, Tuyet Mai Nguyen, D. Le-Nguyen and L. Chiche, Solution structure of the squash trypsin inhibitor MCoTI-II. A new family for cyclic knottins, *Biochemistry*, 2001, **40**, 7973–7983.
- 124 R. Hellinger, J. Koebach, A. Puigpinós, R. J. Clark, T. Tarragó, E. Giralt and C. W. Gruber, Inhibition of human prolyl oligopeptidase activity by the cyclotide psysol 2 isolated from *Psychotria solitudinum*, *J. Nat. Prod.*, 2015, **78**, 1073–1082.
- 125 R. Hellinger, J. Koebach, D. E. Soltis, E. J. Carpenter, G. K. S. Wong and C. W. Gruber, Peptidomics of circular cysteine-rich plant peptides: Analysis of the diversity of cyclotides from *Viola tricolor* by transcriptome and proteome mining, *J. Proteome Res.*, 2015, **14**, 4851–4862.
- 126 F. Herrera-Chalé, J. C. Ruiz-Ruiz, D. Betancur-Ancona and M. R. Segura-Campos, Potential therapeutic applications of *Mucuna pruriens* peptide fractions purified by high-performance liquid chromatography as angiotensin-converting enzyme inhibitors, antioxidants, antithrombotic and hypocholesterolemic agents, *J. Med. Food*, 2016, **19**, 187–195.
- 127 A. Herrmann, R. Burman, J. S. Mylne, G. Karlsson, J. Gullbo, D. J. Craik, R. J. Clark and U. Göransson, The alpine violet, *Viola biflora*, is a rich source of cyclotides with potent cytotoxicity, *Phytochemistry*, 2008, **69**, 939–952.
- 128 P. W. Hsieh, F. R. Chang, C. C. Wu, K. Y. Wu, C. M. Li, S. L. Chen and Y. C. Wu, New cytotoxic cyclic peptides and dianthramide from *Dianthus superbus*, *J. Nat. Prod.*, 2004, **67**, 1522–1527.
- 129 Y. Hu, A. Stromeck, J. Loponen, D. Lopes-Lutz, A. Schieber and M. G. Gänzle, LC-MS/MS quantification of bioactive angiotensin I-converting enzyme inhibitory peptides in rye malt sourdoughs, *J. Agric. Food Chem.*, 2011, **59**, 11983–11989.
- 130 R. H. Huang, Y. Xiang, X. Z. Liu, Y. Zhang, Z. Hu and D. C. Wang, Two novel antifungal peptides distinct with a five-disulfide motif from the bark of *Eucommia ulmoides* Oliv, *FEBS Lett.*, 2002, **521**, 87–90.
- 131 R. H. Huang, Y. Xiang, G. Z. Tu, Y. Zhang and D. C. Wang, Solution structure of *Eucommia* antifungal peptide: A novel structural model distinct with a five-disulfide motif, *Biochemistry*, 2004, **43**, 6005–6012.
- 132 Q. K. Huynh, J. R. Borgmeyer, C. E. Smith, L. D. Bell and D. M. Shah, Isolation and characterization of a 30 kDa protein with antifungal activity from leaves of *Engelmannia pinnatifida*, *Biochem. J.*, 1996, **316**, 723–727.
- 133 D. C. Ireland, M. L. Colgrave and D. J. Craik, A novel suite of cyclotides from *Viola odorata*: sequence variation and the implications for structure, function and stability, *Biochem J*, 2006, **400**, 1–12.
- 134 D. C. Ireland, M. L. Colgrave, P. Nguyencong, N. L. Daly and D. J. Craik, Discovery and Characterization of a Linear Cyclotide from *Viola odorata*: Implications for the Processing of Circular Proteins, *J. Mol. Biol.*, 2006, **357**, 1522–1535.
- 135 N. Ishibashi, D. Yamauchi and T. Minamikawa, Stored mRNA in cotyledons of *Vigna unguiculata* seeds: nucleotide sequence of cloned cDNA for a stored mRNA and induction of its synthesis by precocious germination, *Plant Mol. Biol.*, 1990, **15**, 59–64.
- 136 T. Iwai, H. Kaku, R. Honkura, S. Nakamura, H. Ochiai, T. Sasaki and Y. Ohashi, Enhanced resistance to seed-transmitted bacterial diseases in transgenic rice plants overproducing an oat cell-wall-bound thionin, *Mol. Plant-Microbe Interact.*, 2002, **15**, 515–521.
- 137 H. W. Jack and B. N. Tzi, Sesquin, a potent defensin-like antimicrobial peptide from ground beans with inhibitory activities toward tumor cells and HIV-1 reverse transcriptase, *Peptides*, 2005, **26**, 1120–1126.
- 138 S. K. Jami, T. Swathi Anuradha, L. Guruprasad and P. B. Kirti, Molecular, biochemical and structural characterization of osmotin-like protein from black nightshade

- (*Solanum nigrum*), *J. Plant Physiol.*, 2007, **164**, 238–252.
- 139 B. J. C. Janssen, H. J. Schirra, F. T. Lay, M. A. Anderson and D. J. Craik, Structure of *Petunia hybrida* defensin 1, a novel plant defensin with five disulfide bonds, *Biochemistry*, 2003, **42**, 8214–8222.
- 140 C. Jennings, J. West, C. Waive, D. Craik and M. Anderson, Biosynthesis and insecticidal properties of plant cyclotides : The cyclic knotted proteins from *Oldenlandia affinis*, *Proc Natl Acad Sci U S A*, 2001, **98**, 10614–10619.
- 141 V. K. Jimsheena and L. R. Gowda, Arachin derived peptides as selective angiotensin I-converting enzyme (ACE) inhibitors: Structure-activity relationship, *Peptides*, 2010, **31**, 1165–1176.
- 142 S. Johansson, J. Gullbo, P. Lindholm, B. Ek, E. Thunberg, G. Samuelsson, R. Larsson, L. Bohlin and P. Claeson, Small, novel proteins from the mistletoe *Phoradendron tomentosum* exhibit highly selective cytotoxicity to human breast cancer cells, *Cell. Mol. Life Sci.*, 2003, **60**, 165–175.
- 143 C. B. Jr and M. Richardson, A new family of small (5 kDa) protein inhibitors of insect alpha-amylases from seeds of sorghum (*Sorghum bicolor* (L) Moench) have sequence homologies with wheat gamma-purothionins, *FEBS Lett.*, 1991, **279**, 1–4.
- 144 K. Kamei, R. Takano, A. Miyasaka, T. Imoto and S. Hara, Amino acid sequence of sweet-taste-suppressing peptide (gurmarin) from the leaves of *Gymnema sylvestre*, *J. Biochem.*, 1992, **111**, 109–112.
- 145 H. Kamimori, K. Hall, D. J. Craik and M. I. Aguilar, Studies on the membrane interactions of the cyclotides kalata B1 and kalata B6 on model membrane systems by surface plasmon resonance, *Anal. Biochem.*, 2005, **337**, 149–153.
- 146 B. Karunanandaa, A. Singh and T. hui Kao, Characterization of a predominantly pistil-expressed gene encoding a  $\gamma$ -thionin-like protein of *Petunia inflata*, *Plant Mol. Biol.*, 1994, **26**, 459–464.
- 147 S. Ketnawa and S. Rawdkuen, Angiotensin Converting Enzyme Inhibitory Peptides From Aquatic and Their Processing By-Products: a Review, *Int. J. Sci. Innov. Discov.*, 2013, **2**, 185–199.
- 148 A. Kiba, H. Saitoh, M. Nishihara, K. Omiya and S. Yamamura, C-terminal domain of a hevein-like protein from *Wasabia japonica* has potent antimicrobial activity, *Plant Cell Physiol.*, 2003, **44**, 296–303.
- 149 Y. S. Kim, J. Y. Park, K. S. Kim, M. K. Ko, S. J. Cheong and B. J. Oh, A thaumatin-like gene in nonclimacteric pepper fruits used as molecular marker in probing disease resistance, ripening, and sugar accumulation, *Plant Mol. Biol.*, 2002, **49**, 125–135.
- 150 S. G. Kini, K. H. Wong, W. L. Tan, T. Xiao and J. P. Tam, Morintides: Cargo-free chitin-binding peptides from *Moringa oleifera*, *BMC Plant Biol.*, 2017, **17**, 1–13.
- 151 J. Koehbach, A. F. Attah, A. Berger, R. Hellinger, T. M. Kutchan, E. J. Carpenter, M. Rolf, M. A. Sonibare, J. O. Moody, G. K. S. Wong, S. Dessein, H. Greger and C. W. Gruber, Cyclotide discovery in Gentianales revisited--identification and characterization of cyclic cystine-knot peptides and their phylogenetic distribution in Rubiaceae plants, *Biopolymers*, 2013, **100**, 438–452.
- 152 J. C. Koo, H. J. Chun, H. C. Park, M. C. Kim, Y. D. Koo, S. C. Koo, H. M. Ok, S. J. Park, S.-H. Lee, D.-J. Yun, C. O. Lim, J. D. Bahk, S. Y. Lee and M. J. Cho, Over-expression of a seed specific hevein-like antimicrobial peptide from *Pharbitis nil* enhances resistance to a fungal pathogen in transgenic tobacco plants., *Plant Mol. Biol.*, 2002, **50**, 441–452. <http://www.ncbi.nlm.nih.gov/pubmed/12369620>
- 153 J. C. Koo, S. Y. Lee, H. J. Chun, Y. H. Cheong, J. S. Choi, S. I. Kawabata, M. Miyagi, S. Tsunasawa, K. S. Ha, D. W. Bae, C. D. Han, B. L. Lee and M. J. Cho, Two hevein homologs isolated from the seed of *Pharbitis nil* L. exhibit potent antifungal activity, *Biochim. Biophys. Acta - Protein Struct. Mol. Enzymol.*, 1998, **1382**, 80–90.
- 154 M. L. J. Korsinczky, H. J. Schirra, K. J. Rosengren, J. West, B. A. Condie, L. Otvos, M. A. Anderson and D. J. Craik, Solution structures by 1H NMR of the novel cyclic trypsin inhibitor SFTI-1 from sunflower seeds and an acyclic permutant, *J. Mol. Biol.*, 2001, **311**, 579–591.
- 155 S. Kosasi, W. G. van der Sluis, R. Boelens, L. A. t. Hart and R. P. Labadie, Labaditin, a novel cyclic decapeptide from the latex of *Jatropha multifida* L. (Euphorbiaceae). Isolation and sequence determination by means of two-dimensional NMR, *FEBS Lett.*, 1989, **256**, 91–96.
- 156 V. Kovaleva, R. Kiyamova, R. Cramer, H. Krynytskyy, I. Gout, V. Filonenko and R. Gout, Purification and molecular cloning of antimicrobial peptides from Scots pine seedlings, *Peptides*, 2009, **30**, 2136–2143.

- 157 J. Kowalska, K. Pszczoła, A. Wilimowska-Pelc, I. Lorenc-Kubis, E. Zuziak, M. Ługowski, A. Łęgowska, A. Kwiatkowska, M. Śleszyńska, A. Lesner, A. Walewska, E. Zabłotna, K. Rolka and T. Wilusz, Trypsin inhibitors from the garden four o'clock (*Mirabilis jalapa*) and spinach (*Spinacia oleracea*) seeds: Isolation, characterization and chemical synthesis, *Phytochemistry*, 2007, **68**, 1487–1496.
- 158 M. Koyama, K. Naramoto, T. Nakajima, T. Aoyama, M. Watanabe and K. Nakamura, Purification and identification of antihypertensive peptides from fermented buckwheat sprouts, *J. Agric. Food Chem.*, 2013, **61**, 3013–3021.
- 159 K. M. Kragh, J. E. Nielsen, K. K. Nielsen, S. Dreboldt and J. D. Mikkelsen, Characterization and localization of new antifungal cysteine-rich proteins from *Beta vulgaris*, *Molecular Plant-Microbe Interactions*, 1995, **8**, 424–434.
- 160 J. Kraszewska, M. C. Beckett, T. C. James and U. Bond, Comparative analysis of the antimicrobial activities of plant defensin-like and ultrashort peptides against food-spoiling bacteria, *Appl. Environ. Microbiol.*, 2016, **82**, 4288–4298.
- 161 M. Krebitz, B. Wagner, F. Ferreira, C. Peterbauer, N. Campillo, M. Witty, D. Kolarich, H. Steinkellner, O. Scheiner and H. Breiteneder, Plant-based heterologous expression of Mal d 2, a thaumatin-like protein and allergen of apple (*Malus domestica*), and its characterization as an antifungal protein, *J. Mol. Biol.*, 2003, **329**, 721–730.
- 162 S. Kumar, N. Singh, M. Sinha, P. Kaur, A. Srinivasan, S. Sharma and T. P. Singh, Isolation, purification, crystallization and preliminary crystallographic studies of amaryllin, a plant pathogenesis-related protein from *Amaryllis belladonna*, *Acta Crystallogr. Sect. F Struct. Biol. Cryst. Commun.*, 2009, **65**, 635–637.
- 163 T. Kuramoto, NII-Electronic Library Service, *Chem. Pharm. Bull.*, 1994, **17**, 1460–1462.
- 164 K. M. Lammers, S. Khandelwal, F. Chaudhry, D. Kryszak, E. L. Puppa, V. Casolaro and A. Fasano, Identification of a novel immunomodulatory gliadin peptide that causes interleukin-8 release in a chemokine receptor CXCR3-dependent manner only in patients with coeliac disease, *Immunology*, 2011, **132**, 432–440.
- 165 H. J. Laure, V. M. Faça, C. Lzumi, J. C. Padovan and L. J. Greene, Low molecular weight squash trypsin inhibitors from *Sechium edule* seeds, *Phytochemistry*, 2006, **67**, 362–370.
- 166 F. T. Lay, F. Brugliera and M. A. Anderson, Isolation and properties of floral defensins from ornamental tobacco and petunia, *Plant Physiol.*, 2003, **131**, 1283–1293.
- 167 C. F. Lee and J. Y. Lin, Amino acid sequences of trypsin inhibitors from the melon *Cucumis melo*, *J. Biochem.*, 1995, **118**, 18–22.
- 168 J. E. Lee, I. Y. Bae, H. G. Lee and C. B. Yang, Tyr-Pro-Lys, an angiotensin I-converting enzyme inhibitory peptide derived from broccoli (*Brassica oleracea Italica*), *Food Chem.*, 2006, **99**, 143–148.
- 169 J. H. Lee, D. H. Lee, H. E. Yu, J. H. Kim and J. S. Lee, Isolation and characterization of a novel glutathione S-transferase-activating peptide from the oriental medicinal plant *Phellodendron amurense*, *Peptides*, 2006, **27**, 2069–2074.
- 170 S. Y. Lee and S. J. Hur, (a), Antihypertensive peptides from animal products, marine organisms, and plants, *Food Chem.*, 2017, **228**, 506–517.
- 171 S. Y. Lee and S. J. Hur, (b), Antihypertensive peptides from animal products, marine organisms, and plants, *Food Chem.*, 2017, **228**, 506–517.
- 172 B. Li, L. Qiao, L. Li, Y. Zhang, K. Li, L. Wang and Y. Qiao, A novel antihypertensive derived from adlay (*Coix lachryma-jobi* L. var. ma-yuen Stapf) glutelin, *Molecules*, 2017, **22**,
- 173 C. H. Li, T. Matsui, K. Matsumoto, R. Yamasaki and T. Kawasaki, Latent production of angiotensin I-converting enzyme inhibitors from buckwheat protein, *J. Pept. Sci.*, 2002, **8**, 267–274.
- 174 C. M. Li, N. H. Tan, Q. Mu, H. L. Zheng, X. J. Hao, H. L. Liang and J. Zhou, Cyclopeptides from the seeds of *Annona glabra*, *Phytochemistry*, 1998, **47**, 1293–1296.
- 175 C. Q. Li, B. G. Li, H. Y. Qi, Q. L. Li, F. P. Wang and G. L. Zhang, Three cyclooctapeptides and one glycoside from *Microtoena prainiana*, *J. Nat. Prod.*, 2004, **67**, 978–982.
- 176 F. Li, X. X. Yang, H. C. Xia, R. Zeng, W. G. Hu, Z. Li and Z. C. Zhang, Purification and characterization of Luffin P1, a ribosome-inactivating peptide from the seeds of *Luffa cylindrica*, *Peptides*, 2003, **24**, 799–805.
- 177 S. S. Li, J. Gullbo, P. Lindholm, R. Larsson, E. Thunberg, G. Samuelsson, L. Bohlin and P. Claeson, Ligatoxin B, a new cytotoxic protein with a novel helix-turn-helix DNA-binding domain from the mistletoe *Phoradendron liga*, *Biochem. J.*, 2002, **366**, 405–413.
- 178 T. B. Lima, O. N. Silva, L. Migliolo, C. R. Souza-Filho, E. G. Gonçalves, I. M. Vasconcelos, J. T. A. Oliveira, A. C. Amaral and O. L. Franco, A Kunitz proteinase

- inhibitor from corms of *Xanthosoma blandum* with bactericidal activity, *J. Nat. Prod.*, 2011, **74**, 969–975.
- 179 K. F. Lin, Y. N. Liu, S. T. D. Hsu, D. Samuel, C. S. Cheng, A. M. J. J. Bonvin and P. C. Lyu, Characterization and structural analyses of nonspecific lipid transfer protein 1 from mung bean, *Biochemistry*, 2005, **44**, 5703–5712.
- 180 X. Lin, S. Kaul, S. Rounsley, T. P. Shea, M. I. Benito, C. D. Town, C. Y. Fujii, T. Mason, C. L. Bowman, M. Barnstead, T. V. Feldblyum, C. R. Buell, K. A. Ketchum, J. Lee, C. M. Ronning, H. L. Koo, K. S. Moffat, L. A. Cronin, M. Shen, ... J. C. Venter, Sequence and analysis of chromosome 2 of the plant *Arabidopsis thaliana*, *Nature*, 1999, **402**, 761–765.
- 181 M. H. Ling, H. Y. Qi and C. W. Chi, Protein, cDNA, and genomic DNA sequences of the towel gourd trypsin inhibitor. A squash family inhibitor, *J. Biol. Chem.*, 1993, **268**, 810–814.
- 182 A. Lipkin, V. Anisimova, A. Nikonorova, A. Babakov, E. Krause, M. Bienert, E. Grishin and T. Egorov, An antimicrobial peptide Ar-AMP from amaranth (*Amaranthus retroflexus* L.) seeds, *Phytochemistry*, 2005, **66**, 2426–2431.
- 183 C. Liu, L. Fang, W. Min, J. Liu and H. Li, Exploration of the molecular interactions between angiotensin-I-converting enzyme (ACE) and the inhibitory peptides derived from hazelnut (*Corylus heterophylla* Fisch.), *Food Chem.*, 2018, **245**, 471–480.
- 184 J. J. Liu, A. Zamani and A. K. M. Ekramoddoullah, Expression profiling of a complex thaumatin-like protein family in western white pine, *Planta*, 2010, **231**, 637–651.
- 185 J. Liu, S. Wang, J. Qi, X. Wang and Y. Song, The immunostimulatory effect of bio-active peptide from pollen on murine and human lymphocytes, *Mech. Ageing Dev.*, 1998, **104**, 125–132.
- 186 L. Liu, L. Liu, B. Lu, M. Chen and Y. Zhang, Evaluation of bamboo shoot peptide preparation with angiotensin converting enzyme inhibitory and antioxidant abilities from byproducts of canned bamboo shoots, *J. Agric. Food Chem.*, 2013, **61**, 5526–5533.
- 187 R. L. Liu, X. L. Ge, X. Y. Gao, H. Y. Zhan, T. Shi, N. Su and Z. Q. Zhang, Two angiotensin-converting enzyme-inhibitory peptides from almond protein and the protective action on vascular endothelial function, *Food Funct.*, 2016, **7**, 3733–3739.
- 188 R. Liu, L. Mu, H. Liu, L. Wei, T. Yan, M. Chen, K. Zhang, J. Li, D. You and R. Lai, Two antimicrobial and nematocidal peptides derived from sequences encoded *Picea sitchensis*, *J. Pept. Sci.*, 2011, **17**, 627–631.
- 189 Y. Liu, J. Luo, C. Xu, F. Ren, C. Peng, G. Wu and J. Zhao, Purification, characterization, and molecular cloning of the gene of a seed-specific antimicrobial protein from pokeweed, *Plant Physiol.*, 2000, **122**, 1015–1024.
- 190 J. G. Luo, X. B. Wang, L. Ma and L. Y. Kong, Gypsophin: A novel  $\alpha$ -glucosidase inhibitory cyclic peptide from the roots of *Gypsophila oldhamiana*, *Bioorganic Med. Chem. Lett.*, 2007, **17**, 4460–4463.
- 191 M. S. Ma, Y. B. In, G. L. Hyeon and C. B. Yang, Purification and identification of angiotensin I-converting enzyme inhibitory peptide from buckwheat (*Fagopyrum esculentum* Moench), *Food Chem.*, 2006, **96**, 36–42.
- 192 S. M. Mandal, A novel hydroxyproline rich glycopeptide from pericarp of *Datura stramonium*: proficiently eradicate the biofilm of antifungals resistant *Candida albicans*., *Biopolymers*, 2012, **98**, 332–337.
- 193 S. M. Mandal, S. Dey, M. Mandal, S. Sarkar, S. Maria-Neto and O. L. Franco, Identification and structural insights of three novel antimicrobial peptides isolated from green coconut water, *Peptides*, 2009, **30**, 633–637.
- 194 S. M. Mandal, L. Migliolo, S. Das, M. Mandal, O. L. Franco and T. K. Hazra, Identification and characterization of a bactericidal and proapoptotic peptide from cycas *revoluta* seeds with DNA binding properties, *J. Cell. Biochem.*, 2012, **113**, 184–193.
- 195 S. M. Mandal, L. Migliolo, O. L. Franco and A. K. Ghosh, Identification of an antifungal peptide from *Trapa natans* fruits with inhibitory effects on *Candida tropicalis* biofilm formation, *Peptides*, 2011, **32**, 1741–1747.
- 196 S. M. Mandal, W. F. Porto, P. Dey, M. K. Maiti, A. K. Ghosh and O. L. Franco, The attack of the phytopathogens and the trumpet solo: Identification of a novel plant antifungal peptide with distinct fold and disulfide bond pattern, *Biochimie*, 2013, **95**, 1939–1948.
- 197 J. P. Marcus, K. C. Goulter, J. L. Green, S. J. Harrison and J. M. Manners, Purification, characterisation and cDNA cloning of an antimicrobial peptide from

- Macadamia integrifolia*, *Eur. J. Biochem.*, 1997, **244**, 743–749.
- 198 J. P. Marcus, J. L. Green, K. C. Goulter and J. M. Manners, A family of antimicrobial peptides is produced by processing of a 7S globulin protein in *Macadamia integrifolia* kernels, *Plant J.*, 1999, **19**, 699–710.
- 199 S. Maria-Neto, R. V. Honorato, F. T. Costa, R. G. Almeida, D. S. Amaro, J. T. A. Oliveira, I. M. Vasconcelos and O. L. Franco, Bactericidal activity identified in 2S albumin from sesame seeds and in silico studies of structure–function relations, *Protein J.*, 2011, **30**, 340–350.
- 200 B. Martineau, K. E. McBride and C. M. Houck, Regulation of metallocarboxypeptidase inhibitor gene expression in tomato, *MGG Mol. Gen. Genet.*, 1991, **228**, 281–286.
- 201 Y. Matsubara, T. Yusa, A. Sawabe, Y. Iizuka, S. ichi Takekuma and Y. Yoshida, Structures of New Cyclic Peptides in Young Unshiu (*Citrus unshiu* MARCOV.), Orange (*Citrus sinensis* OSBECK.) and Amanatsu (*Citrus natsudaikai*) Peelings, *Agric. Biol. Chem.*, 1991, **55**, 2923–2929.
- 202 Y. Matsubayashi and Y. Sakagami, Phytosulfokine, sulfated peptides that induce the proliferation of single mesophyll cells of *Asparagus officinalis* L., *Proc. Natl. Acad. Sci. U. S. A.*, 1996, **93**, 7623–7627.
- 203 T. Matsui, C. H. Li and Y. Osajima, Preparation and characterization of novel bioactive peptides responsible for angiotensin I-converting enzyme inhibition from wheat germ, *J. Pept. Sci.*, 1999, **5**, 289–297.
- 204 T. Matsumoto, K. Nishimura and K. Takeya, New cyclic peptides from *Citrus medica* var. *sarcodactylis* Swingle, *Chem. Pharm. Bull.*, 2002, **50**, 857–860.
- 205 T. Matsumoto, A. Shishido, H. Morita, H. Itokawa and K. Takeya, Cyclolinopeptides F-I, cyclic peptides from linseed, *Phytochemistry*, 2001, **57**, 251–260.
- 206 M. Matsuo, N. Hamato, R. Takano, K. Kamei-Hayashi, Y. Yasuda-Kamatani, K. Nomoto and S. Hara, Trypsin inhibitors from bottle gourd (*Lagenaria leucantha* Rusby var *Depressa* Makino) seeds. Purification and amino acid sequences, *Biochim. Biophys. Acta (BBA)/Protein Struct. Mol.*, 1992, **1120**, 187–192.
- 207 H. H. McAdams, Bacterial stalks are nutrient-scavenging antennas, *Proc. Natl. Acad. Sci. U. S. A.*, 2006, **103**, 11435–11436.
- 208 A. M. McManus, K. J. Nielsen, J. P. Marcus, S. J. Harrison, J. L. Green, J. M. Manners and D. J. Craik, MiAMP1, a novel protein from *Macadamia integrifolia* adopts a Greek key  $\beta$ -barrel fold unique amongst plant antimicrobial proteins, *J. Mol. Biol.*, 1999, **293**, 629–638.
- 209 J. R. McNeal, J. V. Kuehl, J. L. Boore and C. W. De Pamphilis, Complete plastid genome sequences suggest strong selection for retention of photosynthetic genes in the parasitic plant genus *Cuscuta*, *BMC Plant Biol.*, 2007, **7**, 1–22.
- 210 C. Megías, M. Del Mar Yust, J. Pedroche, H. Lquari, J. Girón-Calle, M. Alaiz, F. Millán and J. Vioque, Purification of an ACE Inhibitory Peptide after Hydrolysis of Sunflower (*Helianthus annuus* L.) Protein Isolates, *J. Agric. Food Chem.*, 2004, **52**, 1928–1932.
- 211 F. R. Melo, D. J. Rigden, O. L. Franco, L. V. Mello, M. B. Ary, M. F. Grossi De Sá and C. Bloch, Inhibition of trypsin by cowpea thionin: Characterization, molecular modeling, and docking, *Proteins Struct. Funct. Genet.*, 2002, **48**, 311–319.
- 212 B. Meyer, G. Houlné, J. Pozueta-Romero, M. L. Schantz and R. Schantz, Fruit-specific expression of a defensin-type gene family in bell pepper: Upregulation during ripening and upon wounding, *Plant Physiol.*, 1996, **112**, 615–622.
- 213 A. G. Milbradt, F. Kerek, L. Moroder and C. Renner, Structural characterization of hellethionins from *Helleborus purpurascens*, *Biochemistry*, 2003, **42**, 2404–2411.
- 214 S. B. Milligan and C. S. Gasser, Nature and regulation of pistil-expressed genes in tomato, *Plant Mol. Biol.*, 1995, **28**, 691–711.
- 215 F. B. Mingossi, J. L. Matos, A. P. Rizzato, A. H. Medeiros, M. C. Falco, M. C. Silva-Filho and D. S. Moura, SacRALF1, a peptide signal from the grass sugarcane (*Saccharum* spp.), is potentially involved in the regulation of tissue expansion, *Plant Mol. Biol.*, 2010, **73**, 271–281.
- 216 A. Mishra, S. S. Gauri, S. K. Mukhopadhyay, S. Chatterjee, S. S. Das, S. M. Mandal and S. Dey, Identification and structural characterization of a new pro-apoptotic cyclic octapeptide cyclosaplin from somatic seedlings of *Santalum album* L., *Peptides*, 2014, **54**, 148–158.
- 217 S. Miyoshi, H. Ishikawa, T. Kaneko, F. Fukui, H. Tanaka and S. Maruyama, Structures and Activity of Angiotensin-converting Enzyme Inhibitors in an  $\alpha$ -Zein Hydrolysate, *Agric. Biol. Chem.*, 1991, **55**, 1313–1318.
- 218 L. E. Mole, L. Goodfriend, C. B. Lapkoff, J. M. Kehoe and J. D. Capra, Amino Acid Sequence of Ragweed Pollen Allergen ra5, *Biochemistry*, 1975, **14**, 1216–1220.
- 219 J. S. Moreira, R. G. Almeida, L. S. Tavares, M. O. Santos, L. F. Viccini, I. M. Vasconcelos, J. T. A. Oliveira, N. R. B. Raposo, S. C. Dias and O. L. Franco, Identification of botryticidal proteins with similarity to NBS-LRR proteins in rosemary pepper (*Lippia sidoides* Cham.) flowers, *Protein J.*, 2011, **30**, 32–38.

- 220 T. Mori, B. R. O'Keefe, R. C. Sowder, S. Bringans, R. Gardella, S. Berg, P. Cochran, J. A. Turpin, R. W. Buckheit, J. B. McMahon and M. R. Boyd, Isolation and characterization of Griffithsin, a novel HIV-inactivating protein, from the red alga *Griffithsia* sp., *J. Biol. Chem.*, 2005, **280**, 9345–9353.
- 221 H. Morita, M. Eda, T. Iizuka, Y. Hirasawa, M. Sekiguchi, Y. S. Yun, H. Itokawa and K. Takeya, Structure of a new cyclic nonapeptide, segetalin F, and vasorelaxant activity of segetalins from *Vaccaria segetalis*, *Bioorganic Med. Chem. Lett.*, 2006, **16**, 4458–4461.
- 222 H. Morita, A. Gonda, K. Takeya, H. Itokawa, T. Hirano, K. Oka and O. Shiota, Solution state conformation of an immunosuppressive cyclic dodecapeptide, cycloleonorinin, *Tetrahedron*, 1997, **53**, 7469–7478.
- 223 H. Morita, A. Gonda, K. Takeya, H. Itokawa and Y. Iitaka, Cycloleonoripeptide D, *Tetrahedron*, 1997, **53**, 1617–1626.
- 224 H. Morita, T. Iizuka, C. Y. Choo, K. L. Chan, H. Itokawa and K. Takeya, Dichotomins J and K, vasodilator cyclic peptides from *Stellaria dichotoma*, *J. Nat. Prod.*, 2005, **68**, 1686–1688.
- 225 H. Morita, T. Iizuka, A. Gonda, H. Itokawa and K. Takeya, Cycloleonoripeptides E and F, cyclic nonapeptides from *Leonurus heterophyllus*, *J. Nat. Prod.*, 2006, **69**, 839–841.
- 226 H. Morita, T. Kayashita, H. Kobata, K. Takeya and H. Itokawa, Pseudostellarins A - C, new tyrosinase inhibitory cyclic peptides from *Pseudostellaria heterophylla*, *Tetrahedron*, 1994, **50**, 6797–6804.
- 227 H. Morita, T. Kayashita, A. Shishido, K. Takeya, H. Itokawa and M. Shiro, Dichotomins A - E, new cyclic peptides from *Stellaria dichotoma* L. var. lanceolata Bge, *Tetrahedron*, 1996, **52**, 1165–1176.
- 228 H. Morita, T. Kayashita, K. Takeya, H. Itokawa and M. Shiro, Crystal and solution forms of a cyclic heptapeptide, pseudostellarin D1, *Tetrahedron*, 1995, **51**, 12539–12548.
- 229 H. Morita, T. Kayashita, K. Takeya, H. Itokawa and M. Shiro, Conformation of cyclic heptapeptides: Solid and solution state conformation of yunnanin A, *Tetrahedron*, 1997, **53**, 1607–1616.
- 230 H. Morita, Y. Sato and J. N. I. Kobayashi, Cyclosquamosins A - G, cyclic peptides from the seeds of *Annona squamosa*, *Tetrahedron*, 1999, **55**, 7509–7518.
- 231 H. Morita, K. Takeya and H. Itokawa, Cyclic octapeptides from *Stellaria dichotoma* var. lanceolata, *Phytochemistry*, 1997, **45**, 841–845.
- 232 H. Morita, Y. S. Yun, K. Takeya, H. Itokawa and K. Yamada, Segetalins B, C and D, three new cyclic peptides from *Vaccaria segetalis*, *Tetrahedron*, 1995, **51**, 6003–6014.
- 233 Q. Mu, W. D. Tang, R. Y. Liu, C. M. Li, L. G. Lou, H. D. Sun and C. Q. Hu, Constituents from the Stems of *Goniothalamus griffithii*, *Planta Med.*, 2003, **69**, 826–830.
- 234 J. P. Mulvenna, F. M. Foley and D. J. Craik, Discovery, structural determination, and putative processing of the precursor protein that produces the cyclic trypsin inhibitor sunflower trypsin inhibitor 1, *J. Biol. Chem.*, 2005, **280**, 32245–32253.
- 235 J. P. Mulvenna, L. Sando and D. J. Craik, Processing of a 22 kDa precursor protein to produce the circular protein tricyclon A, *Structure*, 2005, **13**, 691–701.
- 236 B. Murray and R. FitzGerald, Angiotensin Converting Enzyme Inhibitory Peptides Derived from Food Proteins: Biochemistry, Bioactivity and Production, *Curr. Pharm. Des.*, 2007, **13**, 773–791.
- 237 J. S. Mylne, L. Y. Chan, A. H. Chanson, N. L. Daly, H. Schaefer, T. L. Bailey, P. Nguyencong, L. Cascales and D. J. Craik, Cyclic peptides arising by evolutionary parallelism via asparaginyl-endopeptidase-mediated biosynthesis, *Plant Cell*, 2012, **24**, 2765–2778.
- 238 J. S. Mylne, M. L. Colgrave, N. L. Daly, A. H. Chanson, A. G. Elliott, E. J. McCallum, A. Jones and D. J. Craik, Albumins and their processing machinery are hijacked for cyclic peptides in sunflower, *Nat. Chem. Biol.*, 2011, **7**, 257–259.
- 239 J. S. Mylne, C. K. Wang, N. L. van der Weerden and D. J. Craik, Cyclotides are a component of the innate defense of *Oldenlandia affinis*, *Biopolymers*, 2010, **94**, 635–646.
- 240 G. H. Naisbitt, M.-R. Lu, W. R. Gray and L. P. Vernon, Properties of a Small Basic Peptide from Pumpkin Seeds, *Plant Physiol.*, 1988, **88**, 770–773.
- 241 T. Nakahara, A. Sano, H. Yamaguchi, K. Sugimoto, H. Chikata, E. Kinoshita and R. Uchida, Antihypertensive effect of peptide-enriched soy sauce-like seasoning and identification of its angiotensin I-converting enzyme inhibitory substances, *J. Agric. Food Chem.*, 2010, **58**, 821–827.
- 242 M. Nakamura and K. Tsuya, Effect of phase distribution on mechanical properties of Fe–Ni heterogeneous alloys, *Powder Metall.*, 1979, **22**, 179–186.

- 243 A. Napolitano, M. Rodriguez, I. Bruno, S. Marzocco, G. Autore, R. Riccio and L. Gomez-Paloma, Synthesis, structural aspects and cytotoxicity of the natural cyclopeptides yunnanins A, C and phakellistatins 1, 10, *Tetrahedron*, 2003, **59**, 10203–10211.
- 244 R. Nawrot, J. Baryliski, G. Nowicki, J. Broniarczyk, W. Buchwald and A. Goździcka-Józefiak, Plant antimicrobial peptides, *Folia Microbiol. (Praha)*, 2014, **59**, 181–196.
- 245 G. M. Neumann, R. Condrón and G. M. Polya, Purification and mass spectrometry-based sequencing of yellow mustard (*Smopsis alba* L.) 6 kDa proteins Identification as antifungal proteins, *Int. J. Pept. Protein Res.*, 1996, **47**, 437–446.
- 246 T. B. Ng, A. Parkash and W. W. Tso, Purification and characterization of  $\alpha$ - and  $\beta$ -benincasins, arginine/glutamate-rich peptides with translation-inhibiting activity from wax gourd seeds, *Peptides*, 2003, **24**, 11–16.
- 247 P. H. K. Ngai and T. B. Ng, (a), A napin-like polypeptide from dwarf Chinese white cabbage seeds with translation-inhibitory, trypsin-inhibitory, and antibacterial activities, *Peptides*, 2004, **25**, 171–176.
- 248 P. H. K. Ngai and T. B. Ng, (b), A napin-like polypeptide with translation-inhibitory, trypsin-inhibitory, antiproliferative and antibacterial activities from kale seeds, *J. Pept. Res.*, 2004, **64**, 202–208.
- 249 P. H. K. Ngai and T. B. Ng, (c), Coccinin, an antifungal peptide with antiproliferative and HIV-1 reverse transcriptase inhibitory activities from large scarlet runner beans, *Peptides*, 2004, **25**, 2063–2068.
- 250 G. K. T. Nguyen, Y. Lian, E. W. H. Pang, P. Q. T. Nguyen, T. D. Tran and J. P. Tam, Discovery of linear cyclotides in monocot plant *Panicum laxum* of Poaceae family provides new insights into evolution and distribution of cyclotides in plants, *J. Biol. Chem.*, 2013, **288**, 3370–3380.
- 251 G. K. T. Nguyen, W. H. Lim, P. Q. T. Nguyen and J. P. Tam, Novel cyclotides and uncyclotides with highly shortened precursors from *Chassalia chartacea* and effects of methionine oxidation on bioactivities, *J. Biol. Chem.*, 2012, **287**, 17598–17607.
- 252 G. K. T. Nguyen, S. Zhang, N. T. K. Nguyen, P. Q. T. Nguyen, M. S. Chiu, A. Hardjojo and J. P. Tam, Discovery and characterization of novel cyclotides originated from chimeric precursors consisting of albumin-1 chain a and cyclotide domains in the fabaceae family, *J. Biol. Chem.*, 2011, **286**, 24275–24287.
- 253 G. K. T. Nguyen, S. Zhang, W. Wang, C. T. T. Wong, N. T. K. Nguyen and J. P. Tam, Discovery of a linear cyclotide from the bracelet subfamily and its disulfide mapping by top-down mass spectrometry, *J. Biol. Chem.*, 2011, **286**, 44833–44844.
- 254 K. N. T. Nguyen, G. K. T. Nguyen, P. Q. T. Nguyen, K. H. Ang, P. C. Dedon and J. P. Tam, Immunostimulating and Gram-negative-specific antibacterial cyclotides from the butterfly pea (*Clitoria ternatea*), *FEBS J.*, 2016, **283**, 2067–2090.
- 255 K. K. Nielsen, J. E. Nielsen, S. M. Madrid and J. D. Mikkelsen, New antifungal proteins from sugar beet (*Beta vulgaris* L.) showing homology to non-specific lipid transfer proteins, *Plant Mol. Biol.*, 1996, **31**, 539–552.
- 256 K. K. Nielsen, J. E. Nielsen, S. M. Madrid and J. D. Mikkelsen, Characterization of a new antifungal chitin-binding peptide from sugar beet leaves, *Plant Physiol.*, 1997, **113**, 83–91.
- 257 T. Ning-Hua, Z. Jun, C. Chang-Xiang and Z. Shou-Xun, Cyclopeptides from the roots of *Pseudostellaria heterophylla*, *Phytochemistry*, 1993, **32**, 1327–1330.
- 258 G. Nitti, S. Orrù, C. B. Jr, L. Morhy, G. Marino and P. Pucci, Amino acid sequence and disulphide-bridge pattern of three gamma-thionins from *Sorghum bicolor*, *Eur. J. Biochem.*, 1995, **228**, 250–256.
- 259 Y. Nogata, T. Nagamine, M. Yanaka and H. Ohta, Angiotensin I converting enzyme inhibitory peptides produced by autolysis reactions from wheat bran, *J. Agric. Food Chem.*, 2009, **57**, 6618–6622.
- 260 S. B. Nolde, A. A. Vassilevski, E. A. Rogozhin, N. A. Barinov, T. A. Balashova, O. V. Samsonova, Y. V. Baranov, A. V. Feofanov, T. A. Egorov, A. S. Arseniev and E. V. Grishin, Disulfide-stabilized helical hairpin structure and activity of a novel antifungal peptide EcAMP1 from seeds of barnyard grass (*Echinochloa crus-galli*), *J. Biol. Chem.*, 2011, **286**, 25145–25153.
- 261 T. I. Odintsova, T. A. Egorov, A. K. Musolyamov, M. S. Odintsova, V. A. Pukhalsky and E. V. Grishin, Seed defensins from *T. kiharae* and related species: Genome localization of defensin-encoding genes, *Biochimie*, 2007, **89**, 605–612.
- 262 T. I. Odintsova, E. A. Rogozhin, Y. Baranov, A. K. Musolyamov, N. Yalpani, T. A. Egorov and E. V. Grishin, Seed defensins of barnyard grass *Echinochloa crusgalli*

- (L.) Beauv., *Biochimie*, 2008, **90**, 1667–1673.
- 263 T. I. Odintsova, A. A. Vassilevski, A. A. Slavokhotova, A. K. Musolyamov, E. I. Finkina, N. V. Khadeeva, E. A. Rogozhin, T. V. Korostyleva, V. A. Pukhalsky, E. V. Grishin and T. A. Egorov, A novel antifungal hevein-type peptide from *Triticum kiharae* seeds with a unique 10-cysteine motif, *FEBS J.*, 2009, **276**, 4266–4275.
- 264 T. Odintsova, E. Rogozhin, I. Sklyar, A. Musolyamov, A. Kudryavtsev, V. Pukhalsky, A. Smirnov, E. Grishin and T. Egorov, Antifungal Activity of Storage 2S Albumins from Seeds of the Invasive Weed Dandelion *Taraxacum officinale* Wigg., *Protein Pept. Lett.*, 2010, **17**, 522–529.
- 265 T. Olson and G. Samuelsson, (a), The amino acid sequence of viscotoxin A2 from the European mistletoe (*Viscum album* L., Loranthaceae), *Acta Chem. Scand.*, 1972, **26**, 585–595.
- 266 T. Olson and G. Samuelsson, (b), The amino acid sequence of viscotoxin A2 from the European mistletoe (*Viscum album* L., Loranthaceae), *Acta Chem. Scand.*, 1972, **26**, 585–595.
- 267 R. W. Osborn, G. W. De Samblanx, K. Thevissen, I. Goderis, S. Torrekens, F. Van Leuven, S. Attenborough, S. B. Rees and W. F. Broekaert, Isolation and characterisation of plant defensins from seeds of Asteraceae, Fabaceae, Hippocastanaceae and Saxifragaceae, *FEBS Lett.*, 1995, **368**, 257–262.
- 268 Y. I. Oshchepkova, O. N. Veshkurova, E. A. Rogozhin, A. K. Musolyamov, A. N. Smirnov, T. I. Odintsova, T. A. Egorov, E. V. Grishin and S. I. Salikhov, Isolation of the lipid-transporting protein Ns-LTP1 from seeds of the garden fennel flower (*Nigella sativa*), *Russ. J. Bioorganic Chem.*, 2009, **35**, 315–319.
- 269 S. N. Osipov, P. Tsouker, L. Hennig and K. Burger, 3-Trifluoromethyl- and 3-difluoromethyl-thalidomides, *Tetrahedron*, 2004, **60**, 271–274.
- 270 M. Ota and Y. Ariyoshi, Location of the disulfide bonds of the sweetness-suppressing polypeptide gurmamin, *Biosci Biotechnol Biochem*, 1995, **59**, 1956–1957.
- 271 J. Otlewska, H. Whatleyb, A. Polanowska and T. Wilusza, Amino-Acid Sequences of Trypsin Inhibitors From Watermelon (*Citrullus vulgaris*) and Red Bryonia (*Bryonia dioica*) Seeds, *Biol. Chem. Hoppe. Seyler.*, 1987, **368**, 1505–1508.
- 272 C. J. Park, C. B. Park, S. S. Hong, H. S. Lee, S. Y. Lee and S. C. Kim, Characterization and cDNA cloning of two glycine- and histidine-rich antimicrobial peptides from the roots of shepherd's purse, *Capsella bursa-pastoris*, *Plant Mol. Biol.*, 2000, **44**, 187–197.
- 273 S. C. Park, J. Y. Kim, J. K. Lee, I. Hwang, H. Cheong, J. W. Nah, K. S. Hahm and Y. Park, Antifungal mechanism of a novel antifungal protein from pumpkin rinds against various fungal pathogens, *J. Agric. Food Chem.*, 2009, **57**, 9299–9304.
- 274 A. Parkash, T. B. Ng and W. W. Tso, Isolation and characterization of luffacylin, a ribosome inactivating peptide with anti-fungal activity from sponge gourd (*Luffa cylindrica*) seeds, *Peptides*, 2002, **23**, 1019–1024.
- 275 S. U. Patel, R. Osborn, S. Rees and J. M. Thornton, Structural studies of Impatiens balsamina antimicrobial protein (Ib-AMP1), *Biochemistry*, 1998, **37**, 983–990.
- 276 B. B. Patnaik, D. H. Kim, S. H. Oh, Y. S. Song, N. D. M. Chanh, J. S. Kim, W. jin Jung, A. K. Saha, B. B. Bindroo and Y. S. Han, Molecular Cloning and Characterization of Novel Morus alba Germin-Like Protein Gene Which Encodes for a Silkworm Gut Digestion-Resistant Antimicrobial Protein, *PLoS One*, 2012, **7**,
- 277 G. Pearce, D. S. Moura, J. Stratmann and C. A. Ryan, RALF, a 5-kDa ubiquitous polypeptide in plants, arrests root growth and development, *Proc. Natl. Acad. Sci. U. S. A.*, 2001, **98**, 12843–12847.
- 278 G. Pearce, W. F. Siems, R. Bhattacharya, Y. C. Chen and C. A. Ryan, Three hydroxyproline-rich glycopeptides derived from a single petunia polyprotein precursor activate defensin I, a pathogen defense response gene, *J. Biol. Chem.*, 2007, **282**, 17777–17784.
- 279 P. B. Pelegri, F. T. Lay, A. M. Murad, M. A. Anderson and O. L. Franco, Novel insights on the mechanism of action of  $\alpha$ -amylase inhibitors from the plant defensin family, *Proteins Struct. Funct. Genet.*, 2008, **73**, 719–729.
- 280 P. B. Pelegri, A. M. Murad, L. P. Silva, R. C. P. dos Santos, F. T. Costa, P. D. Tagliari, C. Bloch, E. F. Noronha, R. N. G. Miller and O. L. Franco, Identification of a novel storage glycine-rich peptide from guava (*Psidium guajava*) seeds with activity against Gram-negative bacteria, *Peptides*, 2008, **29**, 1271–1279.
- 281 P. B. Pelegri, E. F. Noronha, M. A. R. Muniz, I. M. Vasconcelos, M. D. Chiarello, J. T. A. Oliveira and O. L. Franco, An antifungal peptide from passion fruit (*Passiflora edulis*) seeds with similarities to 2S albumin proteins, *Biochim. Biophys. Acta - Proteins Proteomics*, 2006, **1764**, 1141–1146.
- 282 M. Perazzolli, F. Bampi, S. Faccin, M. Moser, F. De Luca, A. M. Ciccotti, R. Velasco, C. Gessler, I. Pertot and C. Moser, *Armillaria mellea* induces a set of defense genes in grapevine roots and one of them codifies a protein with antifungal activity, *Mol. Plant-Microbe Interact.*, 2010, **23**, 485–496.
- 283 B. Phillippe, B. P. A. Cammue, K. Thevissen, M. Hendriks, K. Eggermont, I. J. Goderis, P. Proost, J. Vandamme, R. W. Osborn, F. Guerbet, J. C. Kader and W. F.

- Broekaert, A Potent Antimicrobial Protein From Onion Seeds Showing Sequence Homology To Plant Lipid Transfer Proteins, *Plant Physiol.*, 1995, **109**, 445–455.
- 284 M. E. F. Pinto, J. M. Batista, J. Koehbach, P. Gaur, A. Sharma, M. Nakabashi, E. M. Cilli, G. M. Giesel, H. Verli, C. W. Gruber, E. W. Blanch, J. F. Tavares, M. S. D. Silva, C. R. S. Garcia and V. S. Bolzani, Ribifolin, an orbitide from *Jatropha ribifolia*, and its potential antimalarial activity, *J. Nat. Prod.*, 2015, **78**, 374–380.
- 285 M. E. F. Pinto, J. Z. G. Najas, L. G. Magalhães, A. F. Bobey, J. N. Mendonça, N. P. Lopes, F. M. Leme, S. P. Teixeira, M. Trovó, A. D. Andricopulo, J. Koehbach, C. W. Gruber, E. M. Cilli and V. S. Bolzani, Inhibition of Breast Cancer Cell Migration by Cyclotides Isolated from *Pombalia calceolaria*, *J. Nat. Prod.*, 2018, **81**, 1203–1208.
- 286 M. F. S. Pinto, I. C. M. Fensterseifer, L. Migliolo, D. A. Sousa, G. De Capdville, J. W. Arboleda-Valencia, M. L. Colgrave, D. J. Craik, B. S. Magalhães, S. C. Dias and O. L. Franco, Identification and structural characterization of novel cyclotide with activity against an insect pest of sugar cane, *J. Biol. Chem.*, 2012, **287**, 134–147.
- 287 E. Pizzo, A. Zanfardino, A. M. A. Di Giuseppe, A. Bosso, N. Landi, S. Ragucci, M. Varcamonti, E. Notomista and A. Di Maro, A new active antimicrobial peptide from PD-L4, a type 1 ribosome inactivating protein of *Phytolacca dioica* L.: A new function of RIPs for plant defence?, *FEBS Lett.*, 2015, **589**, 2812–2818.
- 288 M. R. R. Plan, U. Göransson, R. J. Clark, N. L. Daly, M. L. Colgrave and D. J. Craik, The cyclotide fingerprint in *Oldenlandia affinis*: Elucidation of chemically modified, linear and novel macrocyclic peptides, *ChemBioChem*, 2007, **8**, 1001–1011.
- 289 M. R. R. Plan, I. Saska, A. G. Cagauan and D. J. Craik, Backbone Cyclised Peptides from Plants Show Molluscicidal Activity against the Rice Pest *Pomacea canaliculata* (Golden Apple Snail), *J. Agric. Food Chem.*, 2008, **56**, 5237–5241.
- 290 M. R. Plan, K. J. Rosengren, L. Sando, N. L. Daly and D. J. Craik, Structural and biochemical characteristics of the cyclotide kalata B5 from *Oldenlandia affinis*, *Biopolymers*, 2010, **94**, 647–658.
- 291 R. Portieles, C. Ayra, E. Gonzalez, A. Gallo, R. Rodriguez, O. Chacón, Y. López, M. Rodriguez, J. Castillo, M. Pujol, G. Enriquez, C. Borroto, L. Trujillo, B. P. H. J. Thomma and O. Borrás-Hidalgo, NmDef02, a novel antimicrobial gene isolated from *Nicotiana megalosiphon* confers high-level pathogen resistance under greenhouse and field conditions, *Plant Biotechnol. J.*, 2010, **8**, 678–690.
- 292 M. Postal, A. H. S. Martinelli, A. B. Becker-Ritt, R. Ligabue-Braun, D. R. Demartini, S. F. F. Ribeiro, G. Pasquali, V. M. Gomes and C. R. Carlini, Antifungal properties of *Canavalia ensiformis* urease and derived peptides, *Peptides*, 2012, **38**, 22–32.
- 293 A. G. Poth, M. L. Colgrave, R. Philip, B. Kerenga, N. L. Daly, M. A. Anderson and D. J. Craik, Discovery of cyclotides in the Fabaceae plant family provides new insights into the cyclization, evolution, and distribution of circular proteins, *ACS Chem. Biol.*, 2011, **6**, 345–355.
- 294 A. G. Poth, J. S. Mylne, J. Grassl, R. E. Lyons, A. H. Millar, M. L. Colgrave and D. J. Craik, Cyclotides associate with leaf vasculature and are the products of a novel precursor in *Petunia* (*Solanaceae*), *J. Biol. Chem.*, 2012, **287**, 27033–27046.
- 295 S. Prabhu, S. R. Dennison, B. Lea, T. J. Snape, I. D. Nicholl, I. Radecka and F. Harris, Anionic Antimicrobial and Anticancer Peptides from Plants, *CRC. Crit. Rev. Plant Sci.*, 2013, **32**, 303–320.
- 296 M. Pránting, C. Lööv, R. Burman, U. Göransson and D. I. Andersson, The cyclotide cycloviolacin O2 from *Viola odorata* has potent bactericidal activity against Gram-negative bacteria, *J. Antimicrob. Chemother.*, 2010, **65**, 1964–1971.
- 297 P. Puchalska, M. Luisa Marina and M. Concepción García, Development of a high-performance liquid chromatography-electrospray ionization-quadrupole-time-of-flight-mass spectrometry methodology for the determination of three highly antihypertensive peptides in maize crops, *J. Chromatogr. A*, 2013, **1285**, 69–77.
- 298 P. Puchalska, M. L. Marina Alegre and M. C. García López, Isolation and Characterization of Peptides with Antihypertensive Activity in Foodstuffs, *Crit. Rev. Food Sci. Nutr.*, 2015, **55**, 521–551.
- 299 L. Qiao, B. Li, Y. Chen, L. Li, X. Chen, L. Wang, F. Lu, G. Luo, G. Li and Y. Zhang, Discovery of anti-hypertensive oligopeptides from adlay based on in silico proteolysis and virtual screening, *Int. J. Mol. Sci.*, 2016, **17**,
- 300 A. S. Ravipati, S. T. Henriques, A. G. Poth, Q. Kaas, C. K. Wang, M. L. Colgrave and D. J. Craik, Lysine-rich Cyclotides: A New Subclass of Circular Knotted Proteins from *Violaceae*, *ACS Chem. Biol.*, 2015, **10**, 2491–2500.
- 301 G. Rebmann, F. Mauch and R. Dudler, Sequence of a wheat cDNA encoding a pathogen-induced thaumatin-like protein, *Plant Mol. Biol.*, 1991, **17**, 283–285.
- 302 C. Remuzgo, T. S. Oewel, S. Daffre, T. R. S. Lopes, F. H. Dyszy, S. Schreier, G. M. Machado-Santelli and M. Teresa Machini, Chemical synthesis, structure-activity

- relationship, and properties of shepherin I: A fungicidal peptide enriched in glycine-glycine-histidine motifs, *Amino Acids*, 2014, **46**, 2573–2586.
- 303 S. M. Ribeiro, R. G. Almeida, C. A. A. Pereira, J. S. Moreira, M. F. S. Pinto, A. C. Oliveira, I. M. Vasconcelos, J. T. A. Oliveira, M. O. Santos, S. C. Dias and O. L. Franco, Identification of a *Passiflora alata* Curtis dimeric peptide showing identity with 2S albumins, *Peptides*, 2011, **32**, 868–874.
- 304 A. Rodríguez-Romero, K. G. Ravichandran and M. Soriano-García, Crystal structure of hevein at 2.8 Å resolution, *FEBS Lett.*, 1991, **291**, 307–309.
- 305 E. A. Rogozhin, Y. I. Oshchepkova, T. I. Odintsova, N. V. Khadeeva, O. N. Veshkurova, T. A. Egorov, E. V. Grishin and S. I. Salikhov, Novel antifungal defensins from *Nigella sativa* L. seeds, *Plant Physiol. Biochem.*, 2011, **49**, 131–137.
- 306 E. A. Rogozhin, D. Y. Ryazantsev, E. V. Grishin, T. A. Egorov and S. K. Zavriev, Defense peptides from barnyard grass (*Echinochloa crusgalli* L.) seeds, *Peptides*, 2012, **38**, 33–40.
- 307 J.-J. Ruan, M.-L. Zhou, H. Chen and J.-R. Shao, Identification and Characterization of a Trypsin Inhibitor from *Fagopyrum tataricum* Seeds, *Appl. Biochem. Biotechnol.*, 2011, 1–17.
- 308 D. Y. Ryazantsev, E. A. Rogozhin, T. V. Dimitrieva, P. E. Drobyazina, N. V. Khadeeva, T. A. Egorov, E. V. Grishin and S. K. Zavriev, A novel hairpin-like antimicrobial peptide from barnyard grass (*Echinochloa crusgalli* L.) seeds: Structure-functional and molecular-genetics characterization, *Biochimie*, 2014, **99**, 63–70.
- 309 U. S. Sagaram, R. Pandurangi, J. Kaur, T. J. Smith and D. M. Shah, Structure-activity determinants in antifungal plant defensins msdef1 and mtdef4 with different modes of action against fusarium graminearum, *PLoS One*, 2011, **6**,
- 310 N. Samson, M. G. Bausher, S. Lee and R. K. Jansen, The complete nucleotide sequence of the coffee (*Coffea arabica* L.) chloroplast genome: organization and implications for biotechnology and phylogenetic relationships amongst angiosperms, *Plant Biotechnol. J.*, 2012, **5**, 339–353.
- 311 G. Samuelsson and B. Pettersson, The disulfide bonds of viscotoxin A3 from the European mistletoe (*Viscum album* L., Loranthaceae), *Acta Chem. Scand.*, 1971, **25**, 2048–2054.
- 312 G. Samuelsson, L. Seger and T. Olson, The amino acid sequence of oxidized viscotoxin A3 from the European mistletoe (*Viscum album* L., Loranthaceae), *Acta Chem. Scand.*, 1968, **22**, 2624–2642.
- 313 G. Sanchez, Las instituciones de ciencia y tecnología en los procesos de aprendizaje de la producción agroalimentaria en Argentina, *El Sist. Argentino Innovación Inst. Empres. y Redes. El Desafío La Creación y Apropiación Conoc.*, 2013, **786**, 777–786.
- 314 Y. Sawano, T. Miyakawa, H. Yamazaki, M. Tanokura and K. I. Hatano, Purification, characterization, and molecular gene cloning of an antifungal protein from Ginkgo biloba seeds, *Biol. Chem.*, 2007, **388**, 273–280.
- 315 G. SCHRADER and K. APEL, Isolation and characterization of cDNAs encoding viscotoxins of mistletoe (*Viscum album*), *Eur. J. Biochem.*, 1991, **198**, 549–553.
- 316 A. Segura, M. Moreno, A. Molina and F. García-Olmedo, Novel defensin subfamily from spinach (*Spinacia oleracea*), *FEBS Lett.*, 1998, **435**, 159–162.
- 317 A. Serra, X. Hemu, G. K. T. Nguyen, N. T. K. Nguyen, S. K. Sze and J. P. Tam, A high-throughput peptidomic strategy to decipher the molecular diversity of cyclic cysteine-rich peptides, *Sci. Rep.*, 2016, **6**,
- 318 F. Shao, Z. Hu, Y. M. Xiong, Q. Z. Huang, Chun-Guang Wang, R. H. Zhu and D. C. Wang, A new antifungal peptide from the seeds of *Phytolacca americana*: Characterization, amino acid sequence and cDNA cloning, *Biochim. Biophys. Acta - Protein Struct. Mol. Enzymol.*, 1999, **1430**, 262–268.
- 319 P. Sharma and A. Lönnborg, Isolation and characterization of a cDNA encoding a plant defensin-like protein from roots of Norway spruce, *Plant Mol. Biol.*, 1996, **31**, 707–712.
- 320 S. Sharma, H. N. Verma and N. K. Sharma, Cationic bioactive peptide from the seeds of benincasa hispida, *Int. J. Pept.*, 2014, **2014**,
- 321 Z. O. Shenkarev, A. K. Gizatullina, E. I. Finkina, E. A. Alekseeva, S. V. Balandin, K. S. Mineev, A. S. Arseniev and T. V. Ovchinnikova, Heterologous expression and solution structure of defensin from lentil *Lens culinaris*, *Biochem. Biophys. Res. Commun.*, 2014, **451**, 252–257.
- 322 Z. O. Shenkarev, K. D. Nadezhdin, E. N. Lyukmanova, V. A. Sobol, L. Skjeldal and A. S. Arseniev, Divalent cation coordination and mode of membrane interaction in cyclotides: NMR spatial structure of ternary complex Kalata B7 / Mn<sup>2+</sup> / DPC micelle, *J Inorg Biochem*, 2008, **102**, 1246–1256.
- 323 A. M. Showalter, J. Zhou, D. Rumeau, S. G. Worst and J. E. Varner, Tomato extensin and extensin-like cDNAs: structure and expression in response to wounding, *Plant Mol. Biol.*, 1991, **16**, 547–565.

- 324 M. Silano, R. Di Benedetto, A. Trecca, G. Arrabito, F. Leonardi and M. De Vincenzi, A decapeptide from durum wheat prevents celiac peripheral blood lymphocytes from activation by gliadin peptides, *Pediatr. Res.*, 2007, **61**, 67–71.
- 325 C. Silva-Sánchez, A. P. Barba De La Rosa, M. F. León-Galván, B. O. De Lumen, A. De León-Rodríguez and E. González De Mejía, Bioactive peptides in amaranth (*Amaranthus hypochondriacus*) seed, *J. Agric. Food Chem.*, 2008, **56**, 1233–1240.
- 326 S. M. Simonsen, L. Sando, D. C. Ireland, M. L. Colgrave, R. Bharathi, U. Göransson and D. J. Craik, A continent of plant defense peptide diversity: Cyclotides in Australian hybanthus (*Violaceae*), *Plant Cell*, 2005, **17**, 3176–3189.
- 327 N. K. Singh, K. R. R. Kumar, D. Kumar, P. Shukla and P. B. Kirti, Characterization of a pathogen induced thaumatin-like protein gene AdTLP from *Arachis diogeni*, a wild peanut, *PLoS One*, 2013, **8**, 1–18.
- 328 H. Siow and C. Gan, Extraction, identification, and structure – activity relationship of antioxidative and  $\alpha$ -amylase inhibitory peptides from cumin seeds (*Cuminum cyminum*), *J. Funct. Foods*, 2016, **22**, 1–12.
- 329 A. A. Slavokhotova, T. A. Naumann, N. P. J. Price, E. A. Rogozhin, Y. A. Andreev, A. A. Vassilevski and T. I. Odintsova, Novel mode of action of plant defense peptides - hevein-like antimicrobial peptides from wheat inhibit fungal metalloproteases, *FEBS J.*, 2014, **281**, 4754–4764.
- 330 A. A. Slavokhotova, T. I. Odintsova, E. A. Rogozhin, A. K. Musolyamov, Y. A. Andreev, E. V. Grishin and T. A. Egorov, Isolation, molecular cloning and antimicrobial activity of novel defensins from common chickweed (*Stellaria media* L.) seeds, *Biochimie*, 2011, **93**, 450–456.
- 331 A. A. Slavokhotova, E. A. Rogozhin, A. K. Musolyamov, Y. A. Andreev, P. B. Oparin, A. A. Berkut, A. A. Vassilevski, T. A. Egorov, E. V. Grishin and T. I. Odintsova, Novel antifungal  $\alpha$ -hairpinin peptide from *Stellaria media* seeds: Structure, biosynthesis, gene structure and evolution, *Plant Mol. Biol.*, 2014, **84**, 189–202.
- 332 U. M. S. Soedjanaatmadja, J. Hofsteenge, C. M. Jeronimus-Stratingh, A. P. Bruins and J. J. Beintema, Demonstration by mass spectrometry that pseudo-hevein and hevein have ragged C-terminal sequences, *Biochim. Biophys. Acta (BBA)/Protein Struct. Mol.*, 1994, **1209**, 144–148.
- 333 D. S. Solanki, S. Kumar, K. Parihar, A. Tak, P. Gehlot, R. Pathak and S. K. Singh, Characterization of a novel seed protein of *Prosopis cineraria* showing antifungal activity, *Int. J. Biol. Macromol.*, 2018, **116**, 16–22.
- 334 X. Song, J. Wang, F. Wu, X. Li, M. Teng and W. Gong, cDNA cloning, functional expression and antifungal activities of a dimeric plant defensin SPE10 from *Pachyrrhizus erosus* seeds, *Plant Mol. Biol.*, 2005, **57**, 13–20.
- 335 H. P. Sørensen, L. S. Madsen, J. Petersen, J. T. Andersen, A. M. Hansen and H. C. Beck, Oat (*Avena sativa*) seed extract as an antifungal food preservative through the catalytic activity of a highly abundant class I chitinase, *Appl. Biochem. Biotechnol.*, 2010, **160**, 1573–1584.
- 336 R. G. Spelbrink, N. Dilmac, A. Allen, T. J. Smith, D. M. Shah and G. H. Hockerman, Differential antifungal and calcium channel-blocking activity among structurally related plant defensins, *Plant Physiol.*, 2004, **135**, 2055–2067.
- 337 D. Stachowiak, A. Polanowski, G. Bieniarz and T. Wilusz, Isolation and amino-acid sequence of two inhibitors of serine proteinases, members of the squash inhibitor family, from *Echinocystis lobata* seeds, In *Acta Biochimica Polonica*, 1996, **43**, 507–514.
- 338 A. A. Strömstedt, S. Park, R. Burman and U. Göransson, (a), Bactericidal activity of cyclotides where phosphatidylethanolamine-lipid selectivity determines antimicrobial spectra, *Biochim. Biophys. Acta - Biomembr.*, 2017, **1859**, 1986–2000.
- 339 A. A. Strömstedt, S. Park, R. Burman and U. Göransson, (b), Bactericidal activity of cyclotides where phosphatidylethanolamine-lipid selectivity determines antimicrobial spectra, *BBA - Biomembr.*, 2017, **1859**, 1986–2000.
- 340 R. Sudmoon, N. Sattayasai, W. Bunyatratchata, A. Chaveerach and S. Nuchadomrong, Thermostable mannose-binding lectin from *Dendrobium jindleyanum* with activities dependent on sulfhydryl content, *Acta Biochim. Biophys. Sin. (Shanghai)*, 2008, **40**, 811–818.
- 341 K. Suetsuna, Isolation and characterization of angiotensin I-converting enzyme inhibitor dipeptides derived from *Allium sativum* L (garlic), *J. Nutr. Biochem.*, 1998, **9**, 415–419.
- 342 K. Suetsuna, K. Maekawa and J. R. Chen, Antihypertensive effects of *Undaria pinnatifida* (wakame) peptide on blood pressure in spontaneously hypertensive rats, *J. Nutr. Biochem.*, 2004, **15**, 267–272.
- 343 E. Svängård, U. Göransson, Z. Hocaoglu, J. Gullbo, R. Larsson, P. Claesson and L. Bohlin, Cytotoxic cyclotides from *Viola tricolor*, *J. Nat. Prod.*, 2004, **67**, 144–147.

- 344 R. H. Taylor, D. P. Acland, S. Attenborough, B. P. A. Cammue, I. J. Evans, R. W. Osborn, J. A. Ray, S. B. Rees and W. F. Broekaert, A novel family of small cysteine-rich antimicrobial peptides from seed of *Impatiens balsamina* is derived from a single precursor protein, *J. Biol. Chem.*, 1997, **272**, 24480–24487.
- 345 T. Taira, T. Ohnuma, T. Yamagami, Y. Aso, M. Ishiguro and M. Ishihara, Antifungal activity of rye (*secale cereale*) seed chitinases: The different binding manner of class i and class ii chitinases to the fungal cell walls, *Biosci. Biotechnol. Biochem.*, 2002, **66**, 970–977.
- 346 N. Takeshi, NII-Electronic Library Service, *Chem. Pharm. Bull.*, 1977, **57**, 364–370. <http://www.mendeley.com/research/geology-volcanic-history-eruptive-style-yakedake-volcano-group-central-japan/>
- 347 J. P. Tam, Y. A. Lu, J. L. Yang and K. W. Chiu, An unusual structural motif of antimicrobial peptides containing end-to-end macrocycle and cystine-knot disulfides, *Proc. Natl. Acad. Sci. U. S. A.*, 1999, **96**, 8913–8918.
- 348 F. Tan, G. Zhang, J. Mu, N. Lin, C. Chi and Z. A. D. W. Von Tricho-, Purification, characterization and sequence determination of a double-headed trypsin inhibitor peptide from *Trichosanthes kirilowii* (a Chinese medical herb), *Hoppe Seylers Z Physiol Chem*, 1984, **365**, 1211–1218.
- 349 J. Tang, C. K. Wang, X. Pan, H. Yan, G. Zeng, W. Xu, W. He, N. L. Daly, D. J. Craik and N. Tan, Isolation and characterization of cytotoxic cyclotides from *Viola tricolor*, *Peptides*, 2010, **31**, 1434–1440.
- 350 S. Tassin, W. F. Broekaert, D. Marion, D. P. Acland, M. Ptak, F. Vovelle and P. Sodano, Solution structure of Ace-AMP1, a potent antimicrobial protein extracted from onion seeds. Structural analogies with plant nonspecific lipid transfer proteins, *Biochemistry*, 1998, **37**, 3623–3637.
- 351 F. R. Terras, K. Eggermont, V. Kovaleva, N. V. Raikhel, R. W. Osborn, A. Kester, S. B. Rees, S. Torrekens, F. Van Leuven, J. Vanderleyden, B. P. Cammue and W. F. Broekaert, Small cysteine-rich antifungal proteins from radish: Their role in host defense, *Plant Cell*, 1995, **7**, 573–588.
- 352 F. R. G. Terras, H. M. E. Schoofs, M. F. C. De Bolle, F. Van Leuven, S. B. Rees, J. Vanderleyden, B. P. A. Cammue and W. F. Broekaert, Analysis of two novel classes of plant antifungal proteins from radish (*Raphanus sativus* L.) seeds, *J. Biol. Chem.*, 1992, **267**, 15301–15309.
- 353 F. R. G. Terras, S. Torrekens, F. Van Leuven, R. W. Osborn, J. Vanderleyden, B. P. A. Cammue and W. F. Broekaert, A new family of basic cysteine-rich plant antifungal proteins from Brassicaceae species, *FEBS Lett.*, 1993, **316**, 233–240.
- 354 K. Thevissen, B. P. A. Cammue, K. Lemaire, J. Winderickx, R. C. Dickson, R. L. Lester, K. K. A. Ferket, F. Van Even, A. H. A. Parret and W. F. Broekaert, A gene encoding a sphingolipid biosynthesis enzyme determines the sensitivity of *Saccharomyces cerevisiae* to an antifungal plant defensin from dahlia (*Dahlia merckii*), *Proc. Natl. Acad. Sci. U. S. A.*, 2000, **97**, 9531–9536.
- 355 K. Thevissen, I. E. J. A. François, L. Sijtsma, A. Van Amerongen, W. M. M. Schaaper, R. Meloen, T. Posthuma-Trumpie, W. F. Broekaert and B. P. A. Cammue, Antifungal activity of synthetic peptides derived from *Impatiens balsamina* antimicrobial peptides Ib-AMP1 and Ib-AMP4, *Peptides*, 2005, **26**, 1113–1119.
- 356 K. Thevissen, I. E. J. A. François, J. Y. Takemoto, K. K. A. Ferket, E. M. K. Meert and B. P. A. Cammue, DmAMP1, an antifungal plant defensin from dahlia (*Dahlia merckii*), interacts with sphingolipids from *Saccharomyces cerevisiae*, *FEMS Microbiol. Lett.*, 2003, **226**, 169–173.
- 357 K. Thevissen, R. W. Osborn, D. P. Acland and W. F. Broekaert, Specific binding sites for an antifungal plant defensin from dahlia (*Dahlia merckii*) on fungal cells are required for antifungal activity, *Mol. Plant-Microbe Interact.*, 2000, **13**, 54–61.
- 358 K. Thevissen, D. C. Warnecke, I. E. J. A. François, M. Leipelt, E. Heinz, C. Ott, U. Zähringer, B. P. H. J. Thomma, K. K. A. Ferket and B. P. A. Cammue, Defensins from Insects and Plants Interact with Fungal Glucosylceramides, *J. Biol. Chem.*, 2004, **279**, 3900–3905.
- 359 J. Tian, Y. Shen, X. Yang, S. Liang, L. Shan, H. Li, R. Liu and W. Zhang, Antifungal cyclic peptides from *Psammosilene tunicoides*, *J. Nat. Prod.*, 2010, **73**, 1987–1992.
- 360 J. A. Torres-Castillo, C. M. Jacobo and A. Blanco-Labra, Characterization of a highly stable trypsin-like proteinase inhibitor from the seeds of *Opuntia streptacantha* (*O. streptacantha* Lemaire), *Phytochemistry*, 2009, **70**, 1374–1381.
- 361 M. Trabi and D. J. Craik, Tissue-specific expression of head-to-tail cyclized miniproteins in violaceae and structure determination of the root cyclotide *Viola hederacea* root cyclotide1, *Plant Cell*, 2004, **16**, 2204–2216.
- 362 M. Trabi, J. S. Mylne, L. Sando and D. J. Craik, Circular proteins from *Meliclytus* (Violaceae) refine the conserved protein and gene architecture of cyclotides, *Org. Biomol. Chem.*, 2009, **7**, 2378–2388.

- 363 J. W. Tregearm, F. Morcillo, F. Richaud, A. Berger, R. Singh, S. C. Cheah, C. Hartmann, A. Rival and Y. Duval, Characterization of a defensin gene expressed in oil palm inflorescences: Induction during tissue culture and possible association with epigenetic somaclonal variation events, *J. Exp. Bot.*, 2002, **53**, 1387–1396.
- 364 F. S. Turner, Assessment of insert sizes and adapter content in fastq data from NexteraXT libraries, *Front. Microbiol.*, 2014, **5**, 1–12.
- 365 T. Ueno, M. Tanaka, T. Matsui and K. Matsumoto, Determination of antihypertensive small peptides, Val-Tyr and Ile-Val-Tyr, by fluorometric high-performance liquid chromatography combined with a double heart-cut column-switching technique, *Anal. Sci.*, 2005, **21**, 997–1000.
- 366 H. Umekawa, T. Fujiwara, S. Yoshida, K. Okimura, Y. Uchiyama, M. Nishio, H. Katsuzaki, K. Imai and M. Matsunaga, Antihypertensive effect of angiotensin I-converting enzyme inhibitory peptides from tamari cake in spontaneously hypertensive rats, *Nippon Shokuhin Kagaku Kogaku Kaishi*, 2010, **57**, 361–365.
- 367 L. L. Utkina, Y. A. Andreev, E. A. Rogozhin, T. V. Korostyleva, A. A. Slavokhotova, P. B. Oparin, A. A. Vassilevski, E. V. Grishin, T. A. Egorov and T. I. Odintsova, Genes encoding 4-Cys antimicrobial peptides in wheat *Triticum kiharae* Dorof. et Migush.: Multimodular structural organization, intraspecific variability, distribution and role in defence, *FEBS J.*, 2013, **280**, 3594–3608.
- 368 E. J. M. Van Damme, D. Charels, S. Roy, K. Tierens, A. Barre, J. C. Martins, P. Rougé, F. Van Leuven, M. Does and W. J. Peumans, A gene encoding a hevein-like protein from elderberry fruits is homologous to PR-4 and class V chitinase genes, *Plant Physiol.*, 1999, **119**, 1547–1556.
- 369 A. J. J. van den Berg, S. F. A. J. Horsten, J. J. Kettenes-van den Bosch, B. H. Kroes, C. J. Beukelman, B. R. Leeftang and R. P. Labadie, Curcacycline A - a novel cyclic octapeptide isolated from the latex of *Jatropha curcas* L., *FEBS Lett.*, 1995, **358**, 215–218.
- 370 K. P. B. Van Den Bergh, P. Rougé, P. Proost, J. Coosemans, T. Krouglova, Y. Engelborghs, W. J. Peumans and E. J. M. Van Damme, Synergistic antifungal activity of two chitin-binding proteins from spindle tree (*Euonymus europaeus* L.), *Planta*, 2004, **219**, 221–232.
- 371 K. P. Van den Bergh, E. J. Van Damme, W. J. Peumans and J. Coosemans, Ee-CBP, a hevein-type antimicrobial peptide from bark of the spindle tree (*Euonymus europaeus* L.), *Meded. Rijksuniv. Gent. Fak. Landbouwk. Toegep. Biol. Wet.*, 2002, **67**, 327–331.
- 372 V. Vanoosthuysse, C. Miege, C. Dumas and J. M. Cock, Two large *Arabidopsis thaliana* gene families are homologous to the Brassica gene superfamily that encodes pollen coat proteins and the male component of the self-incompatibility response, *Plant Mol. Biol.*, 2001, **46**, 17–34.
- 373 B. Vecchi and M. C. Añón, ACE inhibitory tetrapeptides from *Amaranthus hypochondriacus* 11S globulin, *Phytochemistry*, 2009, **70**, 864–870.
- 374 L. P. Vernon, G. E. Evett, R. D. Zeikus and W. R. Gray, A toxic thionin from *Pyrularia pubera*: Purification, properties, and amino acid sequence, *Arch. Biochem. Biophys.*, 1985, **238**, 18–29.
- 375 G. C. Vieira Bard, V. V. Nascimento, S. F. F. Ribeiro, R. Rodrigues, J. Perales, A. Teixeira-Ferreira, A. O. Carvalho, K. V. S. Fernandes and V. M. Gomes, Characterization of Peptides from *Capsicum annum* Hybrid Seeds with Inhibitory Activity Against  $\alpha$ -Amylase, Serine Proteinases and Fungi, *Protein J.*, 2015, **34**, 122–129.
- 376 S. Vijayan, L. Guruprasad and P. B. Kirti, Prokaryotic expression of a constitutively expressed *Tephrosia villosa* defensin and its potent antifungal activity, *Appl. Microbiol. Biotechnol.*, 2008, **80**, 1023–1032.
- 377 M. Vila-Perelló, A. Sánchez-Vallet, F. García-Olmedo, A. Molina and D. Andreu, Structural dissection of a highly knotted peptide reveals minimal motif with antimicrobial activity, *J. Biol. Chem.*, 2005, **280**, 1661–1668.
- 378 K. Vriens, S. Peigneur, B. De Coninck, J. Tytgat, B. P. A. Cammue and K. Thevissen, The antifungal plant defensin AtPDF2.3 from *Arabidopsis thaliana* blocks potassium channels, *Sci. Rep.*, 2016, **6**, 1–13.
- 379 C. K. L. Wang, M. L. Colgrave, K. R. Gustafson, D. C. Ireland, U. Goransson and D. J. Craik, Anti-HIV cyclotides from the Chinese medicinal herb *Viola yedoensis*, *J. Nat. Prod.*, 2019, **71**, 47–52.
- 380 C. Wang, M. Tu, D. Wu, H. Chen, C. Chen, Z. Wang and L. Jiang, Identification of an ACE-inhibitory peptide from walnut protein and its evaluation of the inhibitory mechanism, *Int. J. Mol. Sci.*, 2018, **19**,
- 381 H. H. Wang and T. B. Ng, Ginkbilobin, a novel antifungal protein from *Ginkgo biloba* seeds with sequence similarity to embryo-abundant protein, *Biochem. Biophys. Res. Commun.*, 2000, **279**, 407–411.
- 382 H. Wang and T. B. Ng, Novel antifungal peptides from *Ceylon spinach* seeds, *Biochem. Biophys. Res. Commun.*, 2001, **288**, 765–770.

- 383 H. Wang and T. B. Ng, Isolation of an antifungal thaumatin-like protein from kiwi fruits, *Phytochemistry*, 2002, **61**, 1–6.
- 384 H. X. Wang and T. B. Ng, Ascalin, a new anti-fungal peptide with human immunodeficiency virus type 1 reverse transcriptase-inhibiting activity from shallot bulbs, *Peptides*, 2002, **23**, 1025–1029.
- 385 H. X. Wang and T. B. Ng, (a), Dendrocin, a distinctive antifungal protein from bamboo shoots, *Biochem. Biophys. Res. Commun.*, 2003, **307**, 750–755.
- 386 H. X. Wang and T. B. Ng, (b), Isolation of cucurmoschin, a novel antifungal peptide abundant in arginine, glutamate and glycine residues from black pumpkin seeds, *Peptides*, 2003, **24**, 969–972.
- 387 H. X. Wang and T. B. Ng, An antifungal peptide from the coconut, *Peptides*, 2005, **26**, 2392–2396.
- 388 Q. Wang, Y. Huang, C. Qin, M. Liang, X. Mao, S. Li, Y. Zou, W. Jia, H. Li, C. W. Ma and Z. Huang, Bioactive Peptides from *Angelica sinensis* Protein Hydrolyzate Delay Senescence in *Caenorhabditis elegans* through Antioxidant Activities, *Oxid. Med. Cell. Longev.*, 2016, **2016**,
- 389 Q. Wang, Y. Zhang, Y. Hou, P. Wang, S. Zhou, X. Ma and N. Zhang, Purification, characterization of a CkChn134 protein from *Cynanchum komarovii* seeds and synergistic effect with CkTLP against *Verticillium dahliae*, *Protein Sci.*, 2012, **21**, 865–875.
- 390 S. Y. Wang, J. H. Wu, T. B. Ng, X. Y. Ye and P. F. Rao, A non-specific lipid transfer protein with antifungal and antibacterial activities from the mung bean, *Peptides*, 2004, **25**, 1235–1242.
- 391 W. Wang and E. G. De Mejia, in Soy Bioactive Peptides that May Prevent, *Compr. Rev. Food Sci. Food Saf.*, 2005, **4**, 63–78.
- 392 X. Wang and G. J. Bunkers, Potent heterologous antifungal proteins from cheeseweed (*Malva parviflora*), *Biochem. Biophys. Res. Commun.*, 2000, **279**, 669–673.
- 393 X. Wang, G. J. Bunkers, M. R. Walters and R. S. Thoma, Purification and characterization of three antifungal proteins from cheeseweed (*Malva parviflora*), *Biochem. Biophys. Res. Commun.*, 2001, **282**, 1224–1228.
- 394 Y. C. Wang, N. H. Tan, J. Zhou and H. M. Wu, Cyclopeptides from *Dianthus superbus*, *Phytochemistry*, 1998, **49**, 1453–1456.
- 395 N. Wasano, K. Konno, M. Nakamura, C. Hirayama, M. Hattori and K. Tateishi, A unique latex protein, MLX56, defends mulberry trees from insects, *Phytochemistry*, 2009, **70**, 880–888.
- 396 A. Weinhold, N. Wielsch, A. Svatoš and I. T. Baldwin, Label-free nanoUPLC-MS based quantification of antimicrobial peptides from the leaf apoplast of *Nicotiana attenuata*, *BMC Plant Biol.*, 2015, **15**, 1–14.
- 397 A. Wélé, C. Landon, H. Labbé, F. Vovelle, Y. Zhang and B. Bodo, Sequence and solution structure of cherimolacyclopeptides a and B, novel cyclooctapeptides from the seeds of *Annona cherimola*, *Tetrahedron*, 2004, **60**, 405–414.
- 398 A. Wélé, I. Ndoye, Y. Zhang, J. P. Brouard and B. Bodo, Cherimolacyclopeptide D, a novel cycloheptapeptide from the seeds of *Annona cherimola*, *Phytochemistry*, 2005, **66**, 693–696.
- 399 A. Wélé, Y. Zhang, J. P. Brouard, J. L. Pousset and B. Bodo, Two cyclopeptides from the seeds of *Annona cherimola*, *Phytochemistry*, 2005, **66**, 2376–2380.
- 400 A. Wele, Y. Zhang, L. Dubost, J. L. Pousset and B. Bodo, Cyclic peptides from the seeds of *Annona glauca* and *A. cherimola*, *Chem. Pharm. Bull.*, 2006, **54**, 690–692.
- 401 A. Wélé, Y. Zhang, I. Ndoye, J. P. Brouard, J. L. Pousset and B. Bodo, A cytotoxic cyclic heptapeptide from the seeds of *Annona cherimola*, *J. Nat. Prod.*, 2004, **67**, 1577–1579.
- 402 J. B. Whittall, A. Medina-Marino, E. A. Zimmer and S. A. Hodges, Generating single-copy nuclear gene data for a recent adaptive radiation, *Mol. Phylogenet. Evol.*, 2006, **39**, 124–134.
- 403 M. Wiczorek, J. Otlewski, J. Cook, K. Parks, J. Leluk, A. Wilimowska-Pelc, A. Polanowski, T. Wilusz and M. L. Jr, The squash family of serine proteinase inhibitors. Amino acid sequences and association equilibrium constants of inhibitors from squash, summer squash, zucchini, and cucumber seeds, *Biochem. Biophys. Res. Commun.*, 1985, **126**, 646–652.
- 404 T. Wilusz, M. Wiczorek, A. Polanowski, A. Denton, J. Cook and M. Laskowski, Amino-acid Sequence of Two Trypsin Isoinhibitors, ITD I and ITD III from Squash Seeds (*Cucurbita maxima*), *Hoppe. Seylers. Z. Physiol. Chem.*, 1983, **364**, 93–100.
- 405 C. P. Woloshuk, J. S. Meulenhoff, M. Sela-Buurlage, P. J. M. Van Den Elzen and B. J. C. Cornelissen, Pathogen-induced proteins with inhibitory activity toward *Phytophthora infestans*, *Plant Cell*, 1991, **3**, 619–628.

- 406 C. T. T. Wong, M. Taichi, H. Nishio, Y. Nishiuchi and J. P. Tam, Optimal oxidative folding of the novel antimicrobial cyclotide from hedyotis biflora requires high alcohol concentrations, *Biochemistry*, 2011, **50**, 7275–7283.
- 407 J. H. Wong and T. B. Ng, Gymnin, a potent defensin-like antifungal peptide from the Yunnan bean (*Gymnocladus chinensis* Baill), *Peptides*, 2003, **24**, 963–968.
- 408 J. H. Wong and T. B. Ng, Limenin, a defensin-like peptide with multiple exploitable activities from shelf beans, *J. Pept. Sci.*, 2006, **12**, 341–346.
- 409 J. H. Wong, X. Q. Zhang, H. X. Wang and T. B. Ng, A mitogenic defensin from white cloud beans (*Phaseolus vulgaris*), *Peptides*, 2006, **27**, 2075–2081.
- 410 C. S. Wu, Y. N. Wang, S. M. Liu and S. M. Chaw, Chloroplast genome (cpDNA) of *Cycas taitungensis* and 56 cp protein-coding genes of *Gnetum parvifolium*: Insights into cpDNA evolution and phylogeny of extant seed plants, *Mol. Biol. Evol.*, 2007, **24**, 1366–1379.
- 411 J. Wu, A. A. Khan, C. Y. T. Shih and D. S. Shih, Cloning and sequence determination of a gene encoding an osmotin-like protein from strawberry (*Fragaria X ananassa* Duch.), *Mitochondrial DNA*, 2001, **12**, 447–453.
- 412 L. Xia and T. B. Ng, (a), An antifungal protein from flageolet beans, *Peptides*, 2005, **26**, 2397–2403.
- 413 L. Xia and T. B. Ng, (b), Isolation of alliumin, a novel protein with antimicrobial and antiproliferative activities from multiple-cloved garlic bulbs, *Peptides*, 2005, **26**, 177–183.
- 414 Y. Xiang, R.-H. Huang, X.-Z. Liu, Y. Zhang and D.-C. Wang, Crystal structure of a novel antifungal protein distinct with five disulfide bridges from *Eucommia ulmoides* Oliver at an atomic resolution, *J. Struct. Biol.*, 2009, **148**, 86–97.
- 415 J. Xiao, H. Zhang, L. Niu and X. Wang, Efficient screening of a novel antimicrobial peptide from jatropha curcas by cell membrane affinity chromatography, *J. Agric. Food Chem.*, 2011, **59**, 1145–1151.
- 416 K. Yamada, J. Lim, J. H. Dale, H. Chen, P. Shinn, C. J. Palm, A. M. Southwick, H. C. Wu, C. Kim, M. Nguyen, P. Pham, R. Cheuk, G. Karlin-Newmann, S. X. Liu, B. Lam, H. Sakano, T. Wu, G. Yu, M. Miranda, ... J. R. Ecker, Empirical Analysis of Transcriptional Activity in the Arabidopsis Genome, *Science (80- )*, 2003, **302**, 842–846.
- 417 Q. Yan, Z. Jiang, S. Yang, W. Deng and L. Han, A novel homodimeric lectin from *Astragalus mongholicus* with antifungal activity, *Arch. Biochem. Biophys.*, 2005, **442**, 72–81.
- 418 J. Yang, L. Hu, T. Cai, Q. Chen, Q. Ma, J. Yang, C. Meng and J. Hong, Purification and identification of two novel antioxidant peptides from perilla (*Perilla frutescens* L. Britton) seed protein hydrolysates, *PLoS One*, 2018, **13**, 1–15.
- 419 Q. Yang and Z. Z. Gong, Purification and characterization of an ethylene-induced antifungal protein from leaves of guelder rose (*Hydrangea macrophylla*), *Protein Expr. Purif.*, 2002, **24**, 76–82.
- 420 X. Yang, J. Li, X. Wang, W. Fang and M. J. Bidochka, Psc-AFP , an antifungal protein with trypsin inhibitor activity from *Psoralea corylifolia* seeds, *Peptides*, 2006, **27**, 1726–1731.
- 421 Y. Yang, T. A. O. Guanjun, L. I. U. Ping and J. I. A. Liu, Peptide with angiotensin I-converting enzyme inhibitory activity from hydrolyzed corn gluten meal, *J. Agric. Food Chem.*, 2007, **55**, 7891–7895.
- 422 Y. L. Yang, K. F. Hua, P. H. Chuang, S. H. Wu, K. Y. Wu, F. R. Chang and Y. C. Wu, New cyclic peptides from the seeds of *Annona squamosa* L. and their anti-inflammatory activities, *J. Agric. Food Chem.*, 2008, **56**, 386–392.
- 423 S. Yano, K. Suzuki and G. Funatsu, Isolation from alpha-zein of thermolysin peptides with angiotensin I-converting enzyme inhibitory activity, *Biosci Biotechnol Biochem*, 1996, **60**, 661–663.
- 424 X. Y. Ye and T. B. Ng, Peptides from pinto bean and red bean with sequence homology to cowpea 10-kDa protein precursor exhibit antifungal, mitogenic, and HIV-1 reverse transcriptase-inhibitory activities, *Biochem. Biophys. Res. Commun.*, 2001, **285**, 424–429.
- 425 C. S. Yea, A. Ebrahimpour, A. A. Hamid, J. Bakar, K. Muhammad and N. Saari, Winged bean [*Psophorcarpus tetragonolobus* (L.) DC] seeds as an underutilised plant source of bifunctional proteolysate and biopeptides, *Food Funct.*, 2014, **5**, 1007–1016.
- 426 M. Y. Yeshak, R. Burman, K. Asres and U. Göransson, Cyclotides from an extreme habitat: Characterization of cyclic peptides from *viola abyssinica* of the ethiopian highlands, *J. Nat. Prod.*, 2011, **74**, 727–731.

- 427 D. P. Yevtushenko, R. Romero, B. S. Forward, R. E. Hancock, W. W. Kay and S. Misra, Pathogen-induced expression of a cecropin A-melittin antimicrobial peptide gene confers antifungal resistance in transgenic tobacco, *J. Exp. Bot.*, 2005, **56**, 1685–1695.
- 428 A. Yokomizo, Y. Takenaka and T. Takenaka, Antioxidative Activity of Peptides Prepared from Okara Protein, *Food Sci. Technol. Res.*, 2002, **8**, 357–359.
- 429 S. Yokoyama, Y. Iida, Y. Kawasaki, Y. Minami, K. Watanabe and F. Yagi, The chitin-binding capability of Cy-AMP1 from cycad is essential to antifungal activity, *J. Pept. Sci.*, 2009, **15**, 492–497.
- 430 S. Yokoyama, K. Kato, A. Koba, Y. Minami, K. Watanabe and F. Yagi, Purification, characterization, and sequencing of antimicrobial peptides, Cy-AMP1, Cy-AMP2, and Cy-AMP3, from the Cycad (*Cycas revoluta*) seeds, *Peptides*, 2008, **29**, 2110–2117.
- 431 R. A. Yonder Haar, R. D. Allen, E. A. Cohen, C. L. Nessler and T. L. Thomas, Organization of the sunflower 11S storage protein gene family, *Gene*, 1988, **74**, 433–443.
- 432 N. Y. Yount and M. R. Yeaman, Multidimensional signatures in antimicrobial peptides, *Proc. Natl. Acad. Sci. U. S. A.*, 2004, **101**, 7363–7368.
- 433 Y. S. Yun, H. Morita, K. Takeya and H. Itokawa, Cyclic peptides from higher plants. 34. Segetalins G and H, structures and estrogen-like activity of cyclic pentapeptides from *Vaccaria segetalis*, *J. Nat. Prod.*, 1997, **60**, 216–218.
- 434 B. Zeitler, A. Bernhard, H. Meyer, M. Sattler, H. U. Koop and C. Lindermayr, Production of a de-novo designed antimicrobial peptide in *Nicotiana benthamiana*, *Plant Mol. Biol.*, 2013, **81**, 259–272.
- 435 A. De Zélicourt, P. Letousey, S. Thoiron, C. Champion, P. Simoneau, K. Elmorjani, D. Marion, P. Simier and P. Delavault, Ha-DEF1, a sunflower defensin, induces cell death in Oribanche parasitic plants, *Planta*, 2007, **226**, 591–600.
- 436 J. Zhang, B. Liao, D. J. Craik, J. T. Li, M. Hu and W. S. Shu, Identification of two suites of cyclotide precursor genes from metallophyte *Viola baoshanensis*: cDNA sequence variation, alternative RNA splicing and potential cyclotide diversity, *Gene*, 2009, **431**, 23–32.
- 437 Y. Zhang and K. Lewis, Fabatins: New antimicrobial plant peptides, *FEMS Microbiol. Lett.*, 1997, **149**, 59–64.
- 438 M. Zhao, Y. Ma, Y. H. Pan, C. H. Zhang and W. X. Yuan, A hevein-like protein and a class I chitinase with antifungal activity from leaves of the paper mulberry, *Biomed. Chromatogr.*, 2011, **25**, 908–912.
- 439 B. Zhu, T. H. H. Chen and P. H. Li, Expression of three osmotin-like protein genes in response to osmotic stress and fungal infection in potato, *Plant Mol. Biol.*, 1995, **28**, 17–26.
- 440 Zhu Baolong, T. H. Chen and P. H. Li, Activation of two osmotin-like protein genes by abiotic stimuli and fungal pathogen in transgenic potato plants, *Plant Physiol.*, 1995, **108**, 929–937.
- 441 F. Zhu, Y. K. Zhou, Z. L. Ji and X. R. Chen, The plant ribosome-inactivating proteins play important roles in defense against pathogens and insect pest attacks, *Front. Plant Sci.*, 2018, **9**, 1–14.
- 442 Y. J. Zhu, R. Agbayani and P. H. Moore, Ectopic expression of *Dahlia merckii* defensin DmAMP1 improves papaya resistance to *Phytophthora palmivora* by reducing pathogen vigor, *Planta*, 2007, **226**, 87–97.
- 443 U. Zottich, M. Da Cunha, A. O. Carvalho, G. B. Dias, N. Casarin, I. M. Vasconcelos and V. M. Gomes, An antifungal peptide from *Coffea canephora* seeds with sequence homology to glycine-rich proteins exerts membrane permeabilization and nuclear localization in fungi, *Biochim. Biophys. Acta - Gen. Subj.*, 2013, **1830**, 3509–3516.
- 444 U. Zottich, M. Da Cunha, A. O. Carvalho, G. B. Dias, N. C. M. Silva, I. S. Santos, V. V. Do Nascimento, E. C. Miguel, O. L. T. MacHado and V. M. Gomes, Purification, biochemical characterization and antifungal activity of a new lipid transfer protein (LTP) from *Coffea canephora* seeds with  $\alpha$ -amylase inhibitor properties, *Biochim. Biophys. Acta - Gen. Subj.*, 2011, **1810**, 375–383.
- Samuelsson G, Petterson B. Toxic proteins from the mistletoe *Dendrophthora clavata*. II. The amino acid sequence of denclatoxin B. *Acta Pharm Suec.* 1977;14(3):245-54. PMID: 906843.
- Vu L, Huynh QK. Isolation and characterization of a 27-kDa antifungal protein from the fruits of *Diospyros texana*. *Biochem Biophys Res Commun.* 1994 Jul 29;202(2):666-72. doi: 10.1006/bbrc.1994.1982. PMID: 8048935.

- Gilevich MIu, Bodulin AV. Zavisimost' sposoba ékhinokokkékptomii ot stadii razvitiia parazita [Relation of the method of echinococcectomy to the developmental stage of the parasite]. *Khirurgiia (Mosk)*. 1986 Apr;(4):94-7. Russian. PMID: 3713064.
- Thunberg E, Samuelsson G. Isolation and properties of ligatoxin A, a toxic protein from the mistletoe *Phoradendron liga*. *Acta Pharm Suec*. 1982;19(4):285-92. PMID: 7136736.
- Mellstrand ST, Samuelsson G. Phoratoxin, a toxic protein from the mistletoe *Phoradendron tomentosum* subsp. *macrophyllum* (Loranthaceae). The amino acid sequence. *Acta Pharm Suec*. 1974 Sep;11(4):347-60. PMID: 4415051.
- Mellstrand ST, Samuelsson G. Phoratoxin, a toxic protein from the mistletoe *Pharoadendron tomentosum* subsp. *macrophyllum* (Loranthaceae). The disulphide bonds. *Acta Pharm Suec*. 1974 Sep;11(4):367-74. PMID: 4606908.
- Koval'ova VA, Hut RT. [Molecular cloning and characterization of Scotch pine defensin 2]. *Tsitol Genet*. 2008 Nov-Dec;42(6):55-60. Ukrainian. PMID: 19253756.
- Qian YW, Tan FL, Qi ZW, Chi CW. Studies on natural and modified peptide *Trichosanthes* trypsin inhibitors. *Sci China B*. 1990 May;33(5):599-605. PMID: 2390165.
- Olson T, Samuelsson G. The disulphide bonds of viscotoxin A2 from the European mistletoe (*Viscum album* L. *Loranthaceae*). *Acta Pharm Suec*. 1974 Sep;11(4):381-6. PMID: 4607177.
